# Supplementary material for: Water-energy-carbon coupling relationships and barrier analysis: an empirical study based on China
Source: Frontiers journal article supplement (doi:10.3389/feart.2025.1570713), 2025-06-18
Supplement: Table_1.xlsx [file Table_1.xlsx]

## Sheet: 标准化矩阵
地区	year	Z1	Z2	Z3	Z4	Z5	Z6	Z7	Z8	Z9
Beijing	2008	0.886856	0.880375	0.941099	0.174555	0.145422	0.92044	0.101621	0.813253	0.472803
Beijing	2009	0.887245	0.874642	0.948029	0.171859	0.35787	0.931436	0.141303	0.841365	0.912134
Beijing	2010	0.881846	0.862568	0.951732	0.16945	0.308199	0.942216	0.157446	0.831325	0.866109
Beijing	2011	0.880836	0.857544	0.957945	0.172352	0.311191	0.952781	0.144432	0.849398	0.824268
Beijing	2012	0.879127	0.852286	0.961171	0.171316	0.343507	0.956016	0.236524	0.855422	0.849372
Beijing	2013	0.883399	0.85268	0.965591	0.174563	0.394375	0.965071	0.301166	0.859438	0.887029
Beijing	2014	0.884021	0.85014	0.968937	0.172821	0.587074	0.971324	0.436922	0.871486	0.899582
Beijing	2015	0.883438	0.848348	0.971804	0.173084	0.590664	0.976714	0.286232	0.901606	0.941423
Beijing	2016	0.895052	0.860272	0.978973	0.179898	0.591263	0.980379	0.472337	0.917671	0.941423
Beijing	2017	0.891245	0.856289	0.981004	0.171777	0.602633	0.983829	0.466079	0.923695	0.941423
Beijing	2018	0.888526	0.8535	0.982915	0.172401	0.608618	0.984692	0.381027	0.927711	0.945607
Beijing	2019	0.887788	0.852855	0.987097	0.174111	0.614602	0.994825	0.392618	0.961847	0.945607
Beijing	2020	0.888488	0.853641	0.987814	0.176437	0.625972	0.997844	0.216257	0.965863	0.966527
Beijing	2021	0.884099	0.848952	0.989725	0.172056	0.627768	1	0.149054	0.911647	0.966527
Beijing	2022	0.888992	0.854538	0.991398	0.183399	0.628366	0.999569	0.14237	0.955823	1
Tianjin	2008	0.73526	0.770609	0.847909	0.173421	0.150209	0.884433	0.041317	0.453815	0.280335
Tianjin	2009	0.687796	0.721215	0.843608	0.164732	0.147217	0.900604	0.0666335	0.540161	0.1841
Tianjin	2010	0.671289	0.690586	0.859737	0.170346	0.145422	0.91505	0.0709003	0.584337	0.259414
Tianjin	2011	0.671366	0.677308	0.882676	0.172763	0.249551	0.927339	0.117266	0.628514	0.359833
Tianjin	2012	0.680183	0.671808	0.896894	0.17333	0.263914	0.937689	0.104893	0.646586	0.376569
Tianjin	2013	0.670007	0.66286	0.905974	0.172368	0.289647	0.949763	0.128929	0.670683	0.376569
Tianjin	2014	0.66286	0.651439	0.911947	0.171382	0.21544	0.957094	0.191225	0.694779	0.376569
Tianjin	2015	0.679407	0.665006	0.920669	0.180514	0.239378	0.961621	0.0827763	0.738956	0.439331
Tianjin	2016	0.690399	0.67477	0.930108	0.177259	0.266906	0.968521	0.0309344	0.779116	0.472803
Tianjin	2017	0.679445	0.671808	0.932378	0.172311	0.479952	0.972402	0.0435215	0.7751	0.456067
Tianjin	2018	0.643362	0.644546	0.926882	0.125828	0.194494	0.967227	0.026312	0.746988	0.485356
Tianjin	2019	0.627865	0.629591	0.89319	0.175706	0.184321	0.931652	0.0453705	0.580321	0.485356
Tianjin	2020	0.634351	0.635094	0.894743	0.0907133	0.25015	0.932083	0.0459394	0.590361	0.48954
Tianjin	2021	0.616484	0.622285	0.903226	0.171809	0.216038	0.931005	0.0218319	0.556225	0.48954
Tianjin	2022	0.618659	0.627036	0.908722	0.176955	0.230401	0.926261	0.0235386	0.546185	0.523013
Hebei	2008	0.714286	0.908409	0.599283	0.172911	0.201077	0.786977	0.141018	0.421687	0.535565
Hebei	2009	0.677736	0.896911	0.576105	0.158518	0.302813	0.772747	0.169677	0.463855	0.589958
Hebei	2010	0.663598	0.890231	0.620072	0.17144	0.48474	0.781371	0.256649	0.463855	0.702929
Hebei	2011	0.638934	0.881932	0.661649	0.171275	0.486535	0.803364	0.436567	0.453815	0.677824
Hebei	2012	0.629884	0.878362	0.679211	0.17139	0.470975	0.8163	0.338572	0.471888	0.631799
Hebei	2013	0.609376	0.87202	0.683274	0.167774	0.473968	0.818241	0.341345	0.504016	0.640167
Hebei	2014	0.600482	0.868641	0.687575	0.168875	0.497905	0.8232	0.316811	0.516064	0.669456
Hebei	2015	0.622194	0.87501	0.707288	0.204582	0.481747	0.836136	0.275565	0.528112	0.640167
Hebei	2016	0.631865	0.877517	0.734528	0.176478	0.489527	0.846486	0.277059	0.53012	0.623431
Hebei	2017	0.6307	0.876585	0.748507	0.173305	0.502095	0.847779	0.423695	0.552209	0.665272
Hebei	2018	0.609765	0.869703	0.749343	0.166557	0.48474	0.846486	0.167615	0.592369	0.686192
Hebei	2019	0.594267	0.864432	0.731661	0.18746	0.48833	0.829237	0.211848	0.556225	0.686192
Hebei	2020	0.596015	0.864671	0.740741	0.174785	0.548773	0.831608	0.299175	0.556225	0.711297
Hebei	2021	0.598268	0.865681	0.770729	0.174851	0.539198	0.836783	0.252951	0.5	0.711297
Hebei	2022	0.614426	0.871271	0.791637	0.181262	0.551765	0.83398	0.302162	0.546185	0.748954
Shanxi	2008	0.591859	0.924972	0.35675	0.1731	0.0903651	0.657827	0.0930878	0.0180723	0.389121
Shanxi	2009	0.551736	0.917569	0.333811	0.161066	0.124476	0.69448	0.105106	0.182731	0.443515
Shanxi	2010	0.538647	0.911593	0.430944	0.171974	0.193297	0.723803	0.140023	0.128514	0.506276
Shanxi	2011	0.490406	0.902242	0.486499	0.170437	0.241771	0.749461	0.169606	0.0863454	0.518828
Shanxi	2012	0.4685	0.897695	0.502031	0.169459	0.28067	0.751617	0.226284	0.15261	0.531381
Shanxi	2013	0.437505	0.894253	0.505496	0.167535	0.302214	0.75248	0.232684	0.228916	0.589958
Shanxi	2014	0.447642	0.896298	0.521505	0.186802	0.309396	0.758085	0.201394	0.295181	0.594142
Shanxi	2015	0.469005	0.900414	0.541099	1	0.327947	0.772531	0.176077	0.47992	0.594142
Shanxi	2016	0.472268	0.901147	0.555078	0.177021	0.342908	0.769297	0.366733	0.52008	0.610879
Shanxi	2017	0.465703	0.900075	0.623775	0.173856	0.35009	0.789564	0.190727	0.441767	0.615063
Shanxi	2018	0.446632	0.896883	0.642294	0.171193	0.368043	0.788918	0.105177	0.455823	0.686192
Shanxi	2019	0.438204	0.895524	0.642055	0.165661	0.388989	0.779646	0.1386	0.425703	0.686192
Shanxi	2020	0.436107	0.895358	0.6546	0.173971	0.441652	0.779862	0.114991	0.433735	0.753138
Shanxi	2021	0.379981	0.885652	0.707288	0.17162	0.450628	0.817163	0.0801451	0.26506	0.753138
Shanxi	2022	0.368368	0.883548	0.738829	0.173215	0.454219	0.827512	0.129142	0.202811	0.757322
Inner Mongolia	2008	0.461392	0.990834	0.466428	0.173758	0.297427	0.726822	0.088892	0.662651	0.196653
Inner Mongolia	2009	0.446438	0.990508	0.563441	0.173281	0.330341	0.78094	0.103257	0.718876	0.271967
Inner Mongolia	2010	0.380875	0.98927	0.59307	0.169376	0.372831	0.782018	0.162779	0.73494	0.313808
Inner Mongolia	2011	0.322108	0.988161	0.639188	0.170914	0.499102	0.790643	0.274428	0.759036	0.343096
Inner Mongolia	2012	0.309097	0.987884	0.667622	0.17264	0.561939	0.792152	0.309415	0.751004	0.430962
Inner Mongolia	2013	0.258331	0.987159	0.668937	0.166672	0.644524	0.786546	0.353293	0.746988	0.430962
Inner Mongolia	2014	0.267731	0.987361	0.691995	0.176495	0.758229	0.772747	0.392761	0.748996	0.58159
Inner Mongolia	2015	0.27445	0.987529	0.697133	0.204056	0.786954	0.758517	0.374342	0.738956	0.556485
Inner Mongolia	2016	0.2614	0.98732	0.697372	0.166565	0.816278	0.756145	0.317167	0.720884	0.585774
Inner Mongolia	2017	0.213548	0.986489	0.635603	0.178813	0.809695	0.678525	0.291281	0.620482	0.598326
Inner Mongolia	2018	0.177814	0.985924	0.647909	0.169968	0.741472	0.647693	0.09323	0.610442	0.610879
Inner Mongolia	2019	0.148334	0.985449	0.634648	0.233137	0.752843	0.608452	0.0704736	0.566265	0.610879
Inner Mongolia	2020	0.129185	0.985191	0.631541	0.158247	0.782166	0.581501	0.0797895	0.556225	0.610879
Inner Mongolia	2021	0.0312282	0.983498	0.655436	0.16945	0.827648	0.650065	0.0727493	0.375502	0.610879
Inner Mongolia	2022	0	0.982946	0.68626	0.172294	0.798324	0.666451	0.0685535	0.35743	0.669456
Liaoning	2008	0.757088	0.937053	0.748148	0.172747	0.193896	0.839802	0.109302	0.351406	0.51046
Liaoning	2009	0.738872	0.932323	0.76129	0.169639	0.217235	0.85511	0.1386	0.425703	0.518828
Liaoning	2010	0.702478	0.923031	0.777419	0.169105	0.244165	0.865675	0.139738	0.51004	0.560669
Liaoning	2011	0.682203	0.918004	0.804779	0.171727	0.265111	0.885295	0.260631	0.526104	0.58159
Liaoning	2012	0.665657	0.913899	0.817563	0.170872	0.284859	0.901035	0.478879	0.570281	0.598326
Liaoning	2013	0.653228	0.911397	0.828554	0.171694	0.295033	0.905994	0.24008	0.606426	0.598326
Liaoning	2014	0.645887	0.909775	0.835364	0.171719	0.327947	0.912462	0.185962	0.654618	0.594142
Liaoning	2015	0.652723	0.911828	0.839665	0.299257	0.322561	0.916774	0.1999	0.704819	0.60251
Liaoning	2016	0.668453	0.915791	0.799403	0.172689	0.311191	0.868478	0.118191	0.606426	0.439331
Liaoning	2017	0.656141	0.913169	0.803823	0.169475	0.355476	0.86934	0.14877	0.598394	0.619247
Liaoning	2018	0.632836	0.908103	0.808363	0.168497	0.35368	0.869987	0.0580998	0.590361	0.623431
Liaoning	2019	0.621456	0.905731	0.799761	0.187427	0.349491	0.858129	0.0322856	0.554217	0.623431
Liaoning	2020	0.622	0.906347	0.794146	0.180777	0.435069	0.849288	0.0641445	0.544177	0.661088
Liaoning	2021	0.59718	0.901154	0.811231	0.16973	0.437463	0.864597	0.067558	0.52008	0.661088
Liaoning	2022	0.601453	0.902892	0.824253	0.177169	0.43447	0.868047	0.0499929	0.514056	0.627615
Jilin	2008	0.889264	0.984881	0.83417	0.175689	0.183722	0.89931	0.0352724	0.740964	0.23431
Jilin	2009	0.863357	0.981812	0.824851	0.16248	0.220826	0.913325	0.0398948	0.732932	0.288703
Jilin	2010	0.842966	0.979371	0.834886	0.168809	0.247756	0.92238	0.0812118	0.732932	0.343096
Jilin	2011	0.822108	0.976904	0.850179	0.170026	0.263315	0.937257	0.0648556	0.751004	0.34728
Jilin	2012	0.818457	0.976469	0.866308	0.173174	0.289048	0.92389	0.0664201	0.757028	0.334728
Jilin	2013	0.807854	0.975985	0.875388	0.172459	0.338121	0.957309	0.0678424	0.761044	0.230126
Jilin	2014	0.804863	0.97589	0.883154	0.173832	0.354279	0.961621	0.0626511	0.757028	0.414226
Jilin	2015	0.811854	0.976948	0.898327	0.192811	0.381807	0.971971	0.0716825	0.787149	0.426778
Jilin	2016	0.812165	0.977402	0.899164	0.177399	0.433273	0.968521	0.0526952	0.7751	0.380753
Jilin	2017	0.807116	0.977231	0.899522	0.169039	0.313585	0.96464	0.0580287	0.769076	0.414226
Jilin	2018	0.790492	0.97586	0.894026	0.119573	0.438061	0.958603	0.0363391	0.76506	0.556485
Jilin	2019	0.786802	0.975837	0.859737	0.174358	0.383603	0.922596	0.0290144	0.630522	0.556485
Jilin	2020	0.784005	0.976052	0.868339	0.175739	0.40754	0.924968	0.0347035	0.63253	0.606695
Jilin	2021	0.77414	0.975299	0.874313	0.171004	0.444045	0.928633	0.0379747	0.620482	0.606695
Jilin	2022	0.775305	0.975708	0.87491	0.163803	0.497905	0.919577	0.0391836	0.660643	0.702929
Heilongjiang	2008	0.866076	0.99008	0.786738	0.173478	0.199282	0.88508	0.0631489	0.293173	0.230126
Heilongjiang	2009	0.86293	0.989864	0.789725	0.169409	0.259725	0.893057	0.0695491	0.391566	0.322176
Heilongjiang	2010	0.852598	0.989145	0.816129	0.171744	0.3076	0.910522	0.0862608	0.447791	0.376569
Heilongjiang	2011	0.845529	0.988664	0.844086	0.172747	0.319569	0.926046	0.101479	0.463855	0.435146
Heilongjiang	2012	0.843704	0.988541	0.856272	0.173388	0.336326	0.935533	0.147987	0.502008	0.422594
Heilongjiang	2013	0.830343	0.988216	0.859976	0.170042	0.35787	0.939198	0.205163	0.524096	0.422594
Heilongjiang	2014	0.832168	0.988533	0.870251	0.178829	0.357271	0.942863	0.122387	0.598394	0.422594
Heilongjiang	2015	0.830032	0.988671	0.872282	0.205437	0.35009	0.941785	0.104466	0.7249	0.414226
Heilongjiang	2016	0.827041	0.988718	0.875627	0.175895	0.345901	0.940276	0.116342	0.763052	0.39749
Heilongjiang	2017	0.814573	0.988193	0.874313	0.163762	0.338121	0.94006	0.086332	0.795181	0.401674
Heilongjiang	2018	0.804863	0.987893	0.87503	0.167593	0.372232	0.937689	0.0424548	0.801205	0.439331
Heilongjiang	2019	0.799658	0.987875	0.846834	0.174391	0.37702	0.908366	0.041317	0.710843	0.288703
Heilongjiang	2020	0.790026	0.987672	0.845281	0.153997	0.397367	0.906425	0.0603044	0.74498	0.460251
Heilongjiang	2021	0.774412	0.987002	0.850777	0.169492	0.447038	0.90815	0.0707581	0.696787	0.460251
Heilongjiang	2022	0.77445	0.987121	0.862605	0.175352	0.473369	0.905994	0.058171	0.672691	0.506276
Shanghai	2008	0.784433	0.342827	0.897252	0.17116	0.101137	0.886805	0.102048	0.34739	0.497908
Shanghai	2009	0.763264	0.262129	0.894743	0.164083	0.113106	0.900604	0.106742	0.435743	0.506276
Shanghai	2010	0.743688	0.173764	0.896894	0.167346	0.0502693	0.903191	0.0881809	0.389558	0.514644
Shanghai	2011	0.737551	0.139591	0.904898	0.171456	0.0526631	0.915481	0.0958612	0.399598	0.514644
Shanghai	2012	0.733745	0.115961	0.907407	0.169935	0.0568522	0.921302	0.088252	0.439759	0.518828
Shanghai	2013	0.737551	0.102524	0.912903	0.172549	0.0580491	0.925183	0.126298	0.481928	0.523013
Shanghai	2014	0.732968	0.08123	0.919116	0.172179	0.0718133	0.940707	0.170673	0.512048	0.523013
Shanghai	2015	0.719801	0.0433869	0.921266	0.169204	0.0891682	0.945235	0.149552	0.572289	0.527197
Shanghai	2016	0.740736	0.105545	0.936559	0.178714	0.101735	0.95235	0.138885	0.628514	0.531381
Shanghai	2017	0.73658	0.0929534	0.941816	0.173001	0.123279	0.958603	0.106955	0.614458	0.552301
Shanghai	2018	0.729744	0.0680761	0.944444	0.170955	0.141233	0.962699	0.125729	0.60241	0.456067
Shanghai	2019	0.718325	0.0297965	0.951971	0.172311	0.155595	0.977361	0.0999147	0.698795	0.456067
Shanghai	2020	0.724734	0.047381	0.953883	0.184739	0.174746	0.978223	0.0622955	0.702811	0.476987
Shanghai	2021	0.709897	0	0.957467	0.170823	0.17295	0.978655	0.0824207	0.706827	0.476987
Shanghai	2022	0.718481	0.0326294	0.961051	0.18238	0.18851	0.981673	0.0843408	0.720884	0.51046
Jiangsu	2008	0.710868	0.809811	0.765114	0.17347	0.417714	0.844114	0.274428	0.186747	0.698745
Jiangsu	2009	0.693117	0.797816	0.781243	0.170552	0.423698	0.85856	0.255938	0.236948	0.67364
Jiangsu	2010	0.665307	0.779209	0.802628	0.170601	0.428486	0.864812	0.324563	0.263052	0.677824
Jiangsu	2011	0.634584	0.759404	0.819713	0.170363	0.431478	0.877965	0.402361	0.291165	0.677824
Jiangsu	2012	0.62433	0.752437	0.832378	0.171974	0.448833	0.883355	0.460176	0.313253	0.682008
Jiangsu	2013	0.617611	0.739599	0.839427	0.169829	0.471574	0.885295	0.6194	0.335341	0.690377
Jiangsu	2014	0.617921	0.736966	0.853763	0.173495	0.495512	0.899957	0.619115	0.365462	0.698745
Jiangsu	2015	0.637031	0.74829	0.871565	0.178887	0.50389	0.908581	0.670246	0.37751	0.707113
Jiangsu	2016	0.641226	0.749034	0.885305	0.174555	0.518253	0.913972	0.537335	0.417671	0.711297
Jiangsu	2017	0.634934	0.743631	0.89546	0.172714	0.527828	0.920224	0.501636	0.413655	0.715481
Jiangsu	2018	0.619591	0.732806	0.899403	0.169911	0.510473	0.923243	0.308704	0.419679	0.732218
Jiangsu	2019	0.611668	0.726848	0.905137	0.171916	0.529623	0.930358	0.280117	0.451807	0.732218
Jiangsu	2020	0.616135	0.729548	0.909438	0.176939	0.551167	0.932083	0.359693	0.455823	0.736402
Jiangsu	2021	0.598578	0.716995	0.917324	0.171464	0.566727	0.934455	0.293699	0.413655	0.736402
Jiangsu	2022	0.606968	0.722215	0.924134	0.177029	0.591861	0.936179	0.312473	0.423695	0.761506
Zhejiang	2008	0.806883	0.909154	0.849821	0.169927	0.20766	0.832902	0.362466	0.238956	0.493724
Zhejiang	2009	0.794415	0.902747	0.849821	0.166121	0.27708	0.834196	0.133694	0.287149	0.514644
Zhejiang	2010	0.784976	0.895432	0.867742	0.171349	0.294434	0.846486	0.230195	0.303213	0.518828
Zhejiang	2011	0.765672	0.886672	0.878017	0.170207	0.337522	0.858129	0.162637	0.315261	0.523013
Zhejiang	2012	0.766294	0.886648	0.887216	0.1743	0.379414	0.866322	0.259849	0.343373	0.585774
Zhejiang	2013	0.773207	0.883444	0.893668	0.171571	0.377618	0.867831	0.270516	0.355422	0.60251
Zhejiang	2014	0.769906	0.87973	0.897849	0.170577	0.405147	0.877749	0.33011	0.355422	0.623431
Zhejiang	2015	0.771537	0.878564	0.904182	0.173149	0.422501	0.887236	0.305575	0.369478	0.615063
Zhejiang	2016	0.777597	0.87974	0.915173	0.175106	0.421305	0.889176	0.455554	0.409639	0.631799
Zhejiang	2017	0.779072	0.878516	0.922939	0.173453	0.430281	0.891332	0.314962	0.425703	0.606695
Zhejiang	2018	0.776121	0.87499	0.927599	0.171555	0.454817	0.891979	0.211848	0.429719	0.65272
Zhejiang	2019	0.780044	0.874938	0.936081	0.174292	0.472771	0.903191	0.189518	0.477912	0.65272
Zhejiang	2020	0.781791	0.874021	0.938232	0.172673	0.446439	0.9047	0.264187	0.5	0.682008
Zhejiang	2021	0.773324	0.868153	0.944325	0.171563	0.403351	0.904269	0.262409	0.465863	0.682008
Zhejiang	2022	0.78117	0.871543	0.949701	0.177999	0.458408	0.905132	0.200612	0.461847	0.677824
Anhui	2008	0.822147	0.928389	0.57957	0.169146	0.189108	0.857266	0.0917366	0.46988	0.422594
Anhui	2009	0.814068	0.925565	0.61589	0.171933	0.245362	0.862009	0.0918788	0.455823	0.472803
Anhui	2010	0.792473	0.92025	0.666906	0.171785	0.28845	0.877965	0.120822	0.399598	0.485356
Anhui	2011	0.772936	0.913354	0.709677	0.171374	0.344105	0.89392	0.183118	0.359438	0.569038
Anhui	2012	0.764896	0.910271	0.733811	0.172007	0.346499	0.895429	0.227706	0.353414	0.539749
Anhui	2013	0.745902	0.903689	0.742294	0.168702	0.379414	0.892842	0.352724	0.353414	0.585774
Anhui	2014	0.741397	0.901977	0.761529	0.172804	0.4231	0.902113	0.297753	0.375502	0.640167
Anhui	2015	0.739183	0.900972	0.772282	0.172821	0.433273	0.905347	0.305575	0.439759	0.640167
Anhui	2016	0.738056	0.900219	0.794385	0.173758	0.472172	0.907503	0.347177	0.46988	0.661088
Anhui	2017	0.735221	0.898813	0.812784	0.173248	0.490126	0.912678	0.352013	0.47992	0.682008
Anhui	2018	0.711567	0.89018	0.817563	0.168037	0.511071	0.912462	0.235386	0.48996	0.702929
Anhui	2019	0.711839	0.889973	0.854719	0.174259	0.518851	0.932298	0.232328	0.598394	0.702929
Anhui	2020	0.713237	0.890241	0.861529	0.174793	0.523639	0.930574	0.22223	0.620482	0.67364
Anhui	2021	0.697118	0.884386	0.869415	0.170396	0.500299	0.929711	0.210354	0.604418	0.67364
Anhui	2022	0.695992	0.883721	0.875388	0.173355	0.649312	0.922812	0.230337	0.606426	0.811715
Fujian	2008	0.842383	0.946211	0.823417	0.171612	0.256732	0.836999	0.0519841	0.335341	0.543933
Fujian	2009	0.832401	0.942823	0.834886	0.17042	0.262118	0.851876	0.0548997	0.34739	0.577406
Fujian	2010	0.813796	0.936772	0.849701	0.170133	0.290844	0.873652	0.085123	0.313253	0.631799
Fujian	2011	0.792783	0.929921	0.86141	0.169738	0.33453	0.879258	0.133978	0.307229	0.648536
Fujian	2012	0.789055	0.928244	0.874671	0.17273	0.357271	0.893057	0.151116	0.315261	0.67364
Fujian	2013	0.794182	0.927213	0.886022	0.173207	0.385398	0.89737	0.194069	0.313253	0.707113
Fujian	2014	0.794648	0.926227	0.896655	0.173281	0.396768	0.899741	0.130422	0.311245	0.707113
Fujian	2015	0.800668	0.927456	0.907168	0.176018	0.409934	0.912247	0.156237	0.351406	0.715481
Fujian	2016	0.80529	0.928379	0.918757	0.17527	0.415919	0.918715	0.12772	0.385542	0.728033
Fujian	2017	0.800435	0.925886	0.925806	0.171908	0.478755	0.924536	0.152468	0.399598	0.74477
Fujian	2018	0.79154	0.922182	0.930705	0.170716	0.508079	0.926693	0.15325	0.373494	0.778243
Fujian	2019	0.789909	0.920997	0.942533	0.173651	0.532615	0.943726	0.128431	0.461847	0.778243
Fujian	2020	0.791346	0.921025	0.945042	0.174407	0.527229	0.943941	0.178211	0.487952	0.782427
Fujian	2021	0.776354	0.915395	0.947551	0.169138	0.531418	0.940707	0.135614	0.449799	0.782427
Fujian	2022	0.778568	0.916126	0.953405	0.175122	0.547576	0.947607	0.10283	0.522088	0.761506
Jiangxi	2008	0.886351	0.971351	0.721386	0.173338	0.267504	0.884002	0.0207652	0.293173	0.665272
Jiangxi	2009	0.871514	0.967983	0.737993	0.169155	0.320168	0.894351	0.0429526	0.355422	0.774059
Jiangxi	2010	0.865494	0.966469	0.780048	0.172714	0.413525	0.90621	0.104181	0.283133	0.866109
Jiangxi	2011	0.850501	0.963043	0.806213	0.170889	0.440455	0.912031	0.164415	0.26506	0.874477
Jiangxi	2012	0.845568	0.96184	0.820191	0.171867	0.47696	0.921518	0.217679	0.289157	0.841004
Jiangxi	2013	0.840752	0.961054	0.835484	0.172779	0.478157	0.923458	0.163277	0.289157	0.803347
Jiangxi	2014	0.842539	0.961396	0.852449	0.175056	0.478755	0.926261	0.157303	0.317269	0.782427
Jiangxi	2015	0.8425	0.961346	0.862007	0.17416	0.468582	0.92583	0.160361	0.359438	0.761506
Jiangxi	2016	0.840558	0.960826	0.874671	0.173305	0.480551	0.928202	0.215688	0.405622	0.740586
Jiangxi	2017	0.840519	0.960691	0.884707	0.17398	0.500898	0.926477	0.217252	0.403614	0.807531
Jiangxi	2018	0.832129	0.958856	0.89092	0.170527	0.511071	0.92583	0.209856	0.447791	0.820084
Jiangxi	2019	0.831314	0.958651	0.904182	0.174004	0.502693	0.932298	0.239084	0.491968	0.820084
Jiangxi	2020	0.826381	0.957547	0.905376	0.168628	0.518851	0.929495	0.201821	0.5	0.857741
Jiangxi	2021	0.809174	0.953838	0.911708	0.169722	0.60383	0.930358	0.229199	0.465863	0.857741
Jiangxi	2022	0.801212	0.952	0.915771	0.170445	0.651107	0.93273	0.16157	0.516064	0.866109
Shandong	2008	0.698283	0.84008	0.707766	0.173585	0.482944	0.876671	0.300242	0.343373	0.58159
Shandong	2009	0.68162	0.830959	0.717324	0.169196	0.536206	0.878827	0.319656	0.373494	0.640167
Shandong	2010	0.666395	0.821237	0.742533	0.1713	0.581089	0.884433	0.337008	0.411647	0.65272
Shandong	2011	0.643673	0.808915	0.76356	0.170757	0.590664	0.893273	0.429597	0.437751	0.65272
Shandong	2012	0.634895	0.803533	0.780406	0.172081	0.612807	0.902329	0.51849	0.463855	0.677824
Shandong	2013	0.616601	0.793004	0.788889	0.169631	0.639138	0.904916	0.595932	0.487952	0.698745
Shandong	2014	0.615863	0.79131	0.805137	0.173552	0.656493	0.912678	0.578723	0.52008	0.707113
Shandong	2015	0.615863	0.79007	0.81589	0.173519	0.672053	0.890901	0.485848	0.528112	0.686192
Shandong	2016	0.612522	0.786054	0.827001	0.17236	0.704967	0.895213	0.548144	0.562249	0.686192
Shandong	2017	0.610075	0.783473	0.836679	0.17287	0.700778	0.9047	0.667615	0.580321	0.677824
Shandong	2018	0.598268	0.776336	0.840024	0.169212	0.688809	0.899094	0.368298	0.608434	0.665272
Shandong	2019	0.588868	0.77073	0.822222	0.177226	0.68462	0.877318	0.304651	0.560241	0.665272
Shandong	2020	0.587276	0.768552	0.825806	0.171645	0.691203	0.861363	0.372707	0.572289	0.656904
Shandong	2021	0.576284	0.762613	0.844086	0.172779	0.706762	0.874515	0.351372	0.552209	0.656904
Shandong	2022	0.587975	0.768971	0.85687	0.178525	0.721125	0.880552	0.348884	0.552209	0.748954
Henan	2008	0.822691	0.908862	0.692832	0.173075	0.123878	0.820828	0.0710425	0.25502	0.39749
Henan	2009	0.814379	0.904509	0.696177	0.16765	0.154997	0.814144	0.0791495	0.269076	0.435146
Henan	2010	0.796473	0.897266	0.725687	0.170996	0.150808	0.84627	0.0869009	0.283133	0.447699
Henan	2011	0.776082	0.888271	0.745281	0.170034	0.165769	0.840017	0.109017	0.297189	0.447699
Henan	2012	0.769323	0.885009	0.762366	0.171925	0.185518	0.852738	0.141872	0.329317	0.460251
Henan	2013	0.766294	0.881552	0.775508	0.171489	0.206463	0.871496	0.197767	0.363454	0.48954
Henan	2014	0.771965	0.883291	0.797611	0.175706	0.227409	0.885727	0.202745	0.385542	0.518828
Henan	2015	0.774722	0.883875	0.810633	0.175015	0.241173	0.898232	0.203243	0.399598	0.493724
Henan	2016	0.781481	0.886132	0.831661	0.176018	0.257331	0.906641	0.248756	0.431727	0.560669
Henan	2017	0.781403	0.885493	0.847431	0.173873	0.351287	0.912678	0.44894	0.447791	0.564854
Henan	2018	0.773285	0.881233	0.853763	0.170461	0.392579	0.912678	0.293628	0.47992	0.631799
Henan	2019	0.768003	0.878281	0.868578	0.172755	0.446439	0.932298	0.336723	0.538153	0.631799
Henan	2020	0.766721	0.877168	0.869176	0.168842	0.496709	0.932945	0.373204	0.576305	0.669456
Henan	2021	0.752855	0.87133	0.872401	0.168842	0.535607	0.932514	0.395961	0.584337	0.669456
Henan	2022	0.758759	0.87427	0.881123	0.178796	0.566727	0.928202	0.290144	0.64257	0.60251
Hubei	2008	0.814845	0.947326	0.685783	0.173273	0.195691	0.861147	0.056962	0.421687	0.48954
Hubei	2009	0.794531	0.942088	0.699044	0.168735	0.206463	0.869125	0.0999858	0.395582	0.497908
Hubei	2010	0.776625	0.937452	0.738112	0.17153	0.208857	0.886373	0.0972835	0.353414	0.493724
Hubei	2011	0.76206	0.933399	0.775149	0.17204	0.238181	0.893273	0.177642	0.327309	0.523013
Hubei	2012	0.748777	0.929749	0.791876	0.170988	0.26152	0.906856	0.195918	0.321285	0.543933
Hubei	2013	0.740659	0.927424	0.807049	0.171851	0.281269	0.923458	0.172593	0.369478	0.51046
Hubei	2014	0.732191	0.925007	0.821386	0.171867	0.297427	0.935533	0.217963	0.383534	0.502092
Hubei	2015	0.734833	0.925256	0.836081	0.174662	0.292041	0.944588	0.168397	0.409639	0.485356
Hubei	2016	0.740348	0.926243	0.855078	0.175344	0.290844	0.949547	0.323354	0.435743	0.48954
Hubei	2017	0.738561	0.925532	0.866308	0.173412	0.291442	0.95235	0.301877	0.441767	0.523013
Hubei	2018	0.728152	0.922628	0.875747	0.171431	0.319569	0.952566	0.173233	0.445783	0.543933
Hubei	2019	0.715451	0.919156	0.889845	0.172105	0.348893	0.961837	0.208932	0.514056	0.543933
Hubei	2020	0.70275	0.918432	0.881959	0.175722	0.460802	0.959465	0.141943	0.594378	0.635983
Hubei	2021	0.693583	0.914843	0.894265	0.171957	0.508677	0.959465	0.206656	0.558233	0.635983
Hubei	2022	0.706712	0.918043	0.906571	0.178435	0.553561	0.959681	0.178637	0.596386	0.711297
Hunan	2008	0.901927	0.967497	0.794863	0.174662	0.109515	0.847779	0.0578865	0.463855	0.414226
Hunan	2009	0.89443	0.965332	0.814576	0.171201	0.140036	0.862441	0.096999	0.5	0.447699
Hunan	2010	0.892294	0.963835	0.844683	0.172804	0.165171	0.908366	0.0686958	0.461847	0.447699
Hunan	2011	0.88138	0.960662	0.864158	0.171218	0.160383	0.896723	0.0834163	0.433735	0.456067
Hunan	2012	0.878389	0.959562	0.8773	0.172549	0.16158	0.912031	0.128218	0.439759	0.464435
Hunan	2013	0.874	0.958586	0.887336	0.172492	0.171155	0.940707	0.159223	0.449799	0.48954
Hunan	2014	0.87668	0.959254	0.901075	0.175582	0.222621	0.951919	0.144858	0.46988	0.531381
Hunan	2015	0.878816	0.959833	0.909797	0.175985	0.230999	0.957956	0.375196	0.475904	0.577406
Hunan	2016	0.878	0.95954	0.917802	0.173684	0.265709	0.963777	0.1354	0.532129	0.615063
Hunan	2017	0.878467	0.959622	0.924612	0.174547	0.230999	0.965502	0.148841	0.568273	0.640167
Hunan	2018	0.875631	0.958809	0.929152	0.172147	0.290844	0.962699	0.0706158	0.608434	0.640167
Hunan	2019	0.875437	0.958733	0.936081	0.17416	0.339916	0.964856	0.0681269	0.596386	0.640167
Hunan	2020	0.877534	0.959287	0.940741	0.176437	0.360862	0.966365	0.125942	0.606426	0.65272
Hunan	2021	0.865571	0.956089	0.942413	0.16816	0.387792	0.965071	0.16349	0.594378	0.65272
Hunan	2022	0.865804	0.956281	0.946595	0.174949	0.414722	0.967012	0.09259	0.63253	0.686192
Guangdong	2008	0.870349	0.932194	0.880645	0.173749	0.318971	0.854248	0.109942	0.226908	0.60251
Guangdong	2009	0.865066	0.928175	0.88638	0.169787	0.367445	0.868909	0.163632	0.281124	0.623431
Guangdong	2010	0.854269	0.920921	0.893548	0.169368	0.428486	0.875809	1	0.269076	0.644351
Guangdong	2011	0.834304	0.911081	0.896894	0.167856	0.491921	0.887667	0.229413	0.279116	0.635983
Guangdong	2012	0.832595	0.90952	0.902987	0.172352	0.579892	0.891548	0.177926	0.305221	0.640167
Guangdong	2013	0.836091	0.905433	0.907407	0.170207	0.587074	0.898448	0.243138	0.325301	0.65272
Guangdong	2014	0.839315	0.905236	0.916129	0.174136	0.607421	0.899526	0.208434	0.329317	0.648536
Guangdong	2015	0.844558	0.906397	0.923895	0.175673	0.674446	0.908797	0.200967	0.339357	0.648536
Guangdong	2016	0.8472	0.90593	0.932378	0.173955	0.702573	0.916343	0.254231	0.391566	0.690377
Guangdong	2017	0.850151	0.905665	0.940143	0.174111	0.724716	0.922812	0.253307	0.411647	0.736402
Guangdong	2018	0.846423	0.901993	0.94325	0.170568	0.7307	0.92583	0.136183	0.425703	0.728033
Guangdong	2019	0.846229	0.900762	0.949343	0.173363	0.718133	0.931867	0.217466	0.471888	0.728033
Guangdong	2020	0.84149	0.897002	0.948746	0.163573	0.718731	0.93122	0.333879	0.48996	0.736402
Guangdong	2021	0.830032	0.890042	0.951971	0.169845	0.694794	0.929495	0.305718	0.467871	0.736402
Guangdong	2022	0.831585	0.891165	0.954839	0.176503	0.707361	0.934455	0.18262	0.465863	0.782427
Guangxi	2008	0.852443	0.971742	0.65448	0.173815	0.148414	0.837214	0.0590243	0.618474	0.284519
Guangxi	2009	0.840752	0.969522	0.656392	0.16668	0.20766	0.827943	0.086972	0.62249	0.32636
Guangxi	2010	0.819118	0.967638	0.706571	0.172204	0.221424	0.842173	0.109586	0.600402	0.380753
Guangxi	2011	0.800163	0.964323	0.737993	0.170683	0.292639	0.861363	0.107737	0.60241	0.481172
Guangxi	2012	0.787268	0.961931	0.749462	0.169533	0.316577	0.875162	0.12836	0.640562	0.485356
Guangxi	2013	0.782995	0.960816	0.767384	0.17204	0.320168	0.880336	0.147774	0.686747	0.493724
Guangxi	2014	0.78218	0.960351	0.785066	0.173264	0.302813	0.885942	0.1354	0.686747	0.560669
Guangxi	2015	0.78921	0.961179	0.804779	0.176651	0.327349	0.894782	0.178637	0.704819	0.48954
Guangxi	2016	0.778762	0.959033	0.811708	0.169401	0.337522	0.905994	0.138103	0.730924	0.48954
Guangxi	2017	0.778723	0.9586	0.811828	0.166738	0.376421	0.897801	0.123809	0.694779	0.552301
Guangxi	2018	0.773013	0.957269	0.824134	0.171703	0.414123	0.885511	0.0745271	0.698795	0.623431
Guangxi	2019	0.77515	0.957328	0.832378	0.17458	0.44225	0.872359	0.0761627	0.706827	0.623431
Guangxi	2020	0.384603	0.955778	0.833692	0.167568	0.402154	0.868478	0.234462	0.73494	0.644351
Guangxi	2021	0.756156	0.953518	0.844325	0.17079	0.459007	0.87085	0.101052	0.680723	0.644351
Guangxi	2022	0.755535	0.953318	0.853763	0.173774	0.331538	0.884217	0.0597355	0.688755	0.682008
Hainan	2008	1	0.995594	0.966308	0.17398	0.171753	0.884217	0.00192007	0.785141	0.677824
Hainan	2009	0.999068	0.995339	0.969892	0.171357	0.229204	0.891548	0.00689802	0.849398	0.669456
Hainan	2010	0.996932	0.994873	0.975627	0.171538	0.304608	0.899957	0.00967145	0.865462	0.698745
Hainan	2011	0.996504	0.994725	0.98172	0.173412	0.381807	0.907934	0.0128005	0.853414	0.665272
Hainan	2012	0.995766	0.994499	0.984349	0.17204	0.351885	0.907072	0.0246764	0.865462	0.640167
Hainan	2013	0.996621	0.994455	0.986858	0.173758	0.379414	0.907072	0.0118049	0.921687	0.677824
Hainan	2014	0.998563	0.99477	0.9908	0.177909	0.41173	0.910737	0.00789361	0.923695	0.644351
Hainan	2015	0.997941	0.994572	0.991278	0.169689	0.408737	0.907503	0.00867586	0.935743	0.493724
Hainan	2016	0.997436	0.994381	0.992593	0.171711	0.352484	0.913109	0.0144361	0.963855	0.60251
Hainan	2017	0.997825	0.994369	0.994504	0.174169	0.360862	0.918715	0.0313611	0.965863	0.594142
Hainan	2018	0.997436	0.99421	0.99546	0.1719	0.245362	0.920224	0.0147916	0.961847	0.661088
Hainan	2019	0.99833	0.994331	0.997372	0.175845	0.265709	0.921949	0.0116626	0.975904	0.661088
Hainan	2020	0.999107	0.994405	0.998208	0.176519	0.328546	0.924536	0.00540464	1	0.615063
Hainan	2021	0.998291	0.994157	1	0.172475	0.408737	0.93122	0.0113071	0.987952	0.615063
Hainan	2022	0.994368	0.993157	0.998686	0.151252	0.365051	0.935533	0.0123027	0.97992	0.690377
Chongqing	2008	0.877379	0.95982	0.758542	0.173018	0.208857	0.8605	0.0407481	0.341365	0.41841
Chongqing	2009	0.873145	0.958352	0.807407	0.173281	0.306403	0.890254	0.0709003	0.443775	0.527197
Chongqing	2010	0.86697	0.956231	0.835245	0.17241	0.425494	0.895645	0.118262	0.455823	0.615063
Chongqing	2011	0.858774	0.953377	0.863321	0.172327	0.702573	0.9116	0.177215	0.459839	0.598326
Chongqing	2012	0.857492	0.952594	0.87957	0.173355	0.718133	0.92928	0.1258	0.447791	0.711297
Chongqing	2013	0.846928	0.948415	0.882318	0.167815	0.712747	0.927339	0.116129	0.445783	0.661088
Chongqing	2014	0.836751	0.944851	0.889128	0.169927	0.648713	0.934886	0.112644	0.445783	0.615063
Chongqing	2015	0.836246	0.944205	0.899403	0.173396	0.64991	0.945882	0.0917366	0.483936	0.60251
Chongqing	2016	0.831275	0.941959	0.908363	0.171793	0.64213	0.953644	0.0954345	0.536145	0.623431
Chongqing	2017	0.829799	0.940867	0.915771	0.172722	0.653501	0.955369	0.150832	0.562249	0.60251
Chongqing	2018	0.825254	0.939105	0.917443	0.169327	0.658887	0.947607	0.10603	0.584337	0.665272
Chongqing	2019	0.825099	0.938568	0.929988	0.173873	0.627169	0.959897	0.109799	0.644578	0.665272
Chongqing	2020	0.825992	0.938436	0.934409	0.174029	0.620586	0.963777	0.141303	0.640562	0.719665
Chongqing	2021	0.82036	0.936622	0.940621	0.172262	0.63076	0.962268	0.139596	0.630522	0.719665
Chongqing	2022	0.821875	0.937067	0.944205	0.175607	0.688211	0.962053	0.136112	0.654618	0.782427
Sichuan	2008	0.932766	0.98841	0.826404	0.174201	0.156194	0.856835	0.0645001	0.413655	0.393305
Sichuan	2009	0.930824	0.988079	0.843847	0.172664	0.201077	0.85856	0.0664913	0.405622	0.439331
Sichuan	2010	0.924804	0.987504	0.867503	0.172599	0.242968	0.871712	0.0561798	0.381526	0.502092
Sichuan	2011	0.914511	0.986137	0.881959	0.170568	0.275284	0.864597	0.0925188	0.395582	0.514644
Sichuan	2012	0.913152	0.985908	0.895818	0.173379	0.278875	0.884433	0.119684	0.411647	0.535565
Sichuan	2013	0.910938	0.985551	0.903943	0.172368	0.30401	0.905994	0.159295	0.413655	0.523013
Sichuan	2014	0.912142	0.985658	0.913381	0.174991	0.307002	0.913756	0.197838	0.449799	0.485356
Sichuan	2015	0.91622	0.986099	0.921266	0.178805	0.348893	0.923027	0.146494	0.485944	0.535565
Sichuan	2016	0.918861	0.986355	0.930705	0.175804	0.379414	0.928417	0.199403	0.544177	0.585774
Sichuan	2017	0.919677	0.986401	0.940024	0.174538	0.380012	0.937473	0.212061	0.582329	0.589958
Sichuan	2018	0.918317	0.986159	0.945639	0.172952	0.409336	0.935533	0.218817	0.592369	0.665272
Sichuan	2019	0.92057	0.986412	0.955317	0.175295	0.472771	0.944157	0.228204	0.636546	0.665272
Sichuan	2020	0.922202	0.986606	0.958423	0.176922	0.494913	0.938767	0.265396	0.648594	0.694561
Sichuan	2021	0.913656	0.985428	0.959618	0.168053	0.454817	0.934886	0.328545	0.62249	0.694561
Sichuan	2022	0.915987	0.985744	0.963441	0.177448	0.470377	0.935101	0.367658	0.630522	0.736402
Guizhou	2008	0.907248	0.98073	0.618757	0.176889	0.00179533	0.626779	0.009387	0.475904	0.16318
Guizhou	2009	0.896489	0.979268	0.652808	0.170897	0	0.652436	0.00796473	0.538153	0.0627615
Guizhou	2010	0.890701	0.978674	0.698447	0.173042	0.0718133	0.674644	0.0142227	0.554217	0.154812
Guizhou	2011	0.883555	0.97757	0.746476	0.172615	0.0676242	0.708926	0.0390414	0.560241	0.267782
Guizhou	2012	0.884603	0.977641	0.791995	0.174448	0.194494	0.736524	0.0418859	0.562249	0.288703
Guizhou	2013	0.873417	0.974739	0.800239	0.168234	0.315978	0.762613	0.0709003	0.568273	0.359833
Guizhou	2014	0.873961	0.974512	0.827718	0.173873	0.381209	0.792799	0.114066	0.586345	0.338912
Guizhou	2015	0.883089	0.975883	0.858065	0.17753	0.40754	0.824925	0.0906699	0.592369	0.41841
Guizhou	2016	0.869727	0.973179	0.859857	0.167001	0.529623	0.838724	0.0770872	0.606426	0.456067
Guizhou	2017	0.864795	0.971961	0.874074	0.171916	0.545781	0.845408	0.146992	0.636546	0.464435
Guizhou	2018	0.859629	0.970892	0.881243	0.171078	0.561341	0.850151	0.0527663	0.638554	0.564854
Guizhou	2019	0.861299	0.970991	0.897133	0.17453	0.613405	0.867831	0.0534775	0.668675	0.564854
Guizhou	2020	0.858075	0.970322	0.901553	0.171407	0.652902	0.874084	0.0499929	0.676707	0.627615
Guizhou	2021	0.85524	0.969855	0.910036	0.173051	0.591263	0.874084	0.0821363	0.666667	0.627615
Guizhou	2022	0.855589	0.969887	0.913142	0.174604	0.6152	0.879474	0.0711136	0.660643	0.677824
Yunnan	2008	0.934242	0.992392	0.788053	0.172385	0.0891682	0.752264	0.0242498	0.465863	0.25523
Yunnan	2009	0.930086	0.991952	0.794385	0.171834	0.165171	0.754636	0.0494951	0.508032	0.435146
Yunnan	2010	0.924493	0.99137	0.814217	0.172007	0.189707	0.766279	0.0684113	0.459839	0.476987
Yunnan	2011	0.915948	0.990504	0.836918	0.169623	0.247157	0.774041	0.0776561	0.508032	0.535565
Yunnan	2012	0.906121	0.989511	0.846595	0.168579	0.257331	0.791289	0.0870431	0.51004	0.560669
Yunnan	2013	0.899829	0.988961	0.859498	0.170067	0.265111	0.797542	0.133054	0.534137	0.497908
Yunnan	2014	0.90216	0.989152	0.87491	0.176421	0.291442	0.808754	0.100981	0.562249	0.51046
Yunnan	2015	0.90651	0.989538	0.887455	0.177481	0.265709	0.838077	0.0930166	0.606426	0.476987
Yunnan	2016	0.909073	0.989748	0.899522	0.175739	0.311191	0.860285	0.0965723	0.648594	0.497908
Yunnan	2017	0.908102	0.989617	0.909438	0.173273	0.321364	0.863519	0.0942967	0.670683	0.543933
Yunnan	2018	0.905383	0.989331	0.915771	0.173626	0.34231	0.863519	0.0728204	0.650602	0.577406
Yunnan	2019	0.905888	0.989353	0.938351	0.174596	0.344105	0.897801	0.0817096	0.73494	0.577406
Yunnan	2020	0.906354	0.989381	0.942533	0.174506	0.367445	0.887883	0.0721092	0.74498	0.610879
Yunnan	2021	0.904412	0.989274	0.948746	0.173182	0.40754	0.896076	0.0926611	0.718876	0.610879
Yunnan	2022	0.908724	0.989675	0.954958	0.174037	0.467385	0.888098	0.0928033	0.720884	0.719665
Shanxi	2008	0.799697	0.965721	0.635364	0.170823	0.154399	0.843251	0.0465794	0.287149	0.535565
Shanxi	2009	0.783034	0.963041	0.672282	0.17107	0.192101	0.870634	0.077585	0.381526	0.539749
Shanxi	2010	0.764429	0.960059	0.716368	0.171612	0.271694	0.882924	0.120324	0.355422	0.518828
Shanxi	2011	0.736542	0.95561	0.746953	0.170527	0.315978	0.896723	0.101906	0.317269	0.535565
Shanxi	2012	0.73759	0.955654	0.782915	0.174374	0.326152	0.906856	0.12132	0.299197	0.606695
Shanxi	2013	0.72353	0.952805	0.792712	0.169623	0.337522	0.911169	0.150548	0.307229	0.598326
Shanxi	2014	0.728268	0.953272	0.815173	0.175106	0.380012	0.916559	0.195847	0.337349	0.610879
Shanxi	2015	0.726093	0.952687	0.816487	0.168941	0.385398	0.919793	0.163846	0.411647	0.615063
Shanxi	2016	0.730172	0.952995	0.831661	0.175015	0.36924	0.91505	0.218603	0.453815	0.594142
Shanxi	2017	0.729628	0.952536	0.850896	0.173716	0.389587	0.918715	0.216541	0.447791	0.585774
Shanxi	2018	0.702323	0.947722	0.853286	0.167264	0.336924	0.925399	0.0923766	0.455823	0.560669
Shanxi	2019	0.68364	0.944471	0.750418	0.165258	0.328546	0.804873	0.104822	0	0.560669
Shanxi	2020	0.672221	0.942427	0.848984	0.154564	0.398564	0.922596	0.14749	0.532129	0.623431
Shanxi	2021	0.648411	0.938508	0.859259	0.170338	0.405147	0.905563	0.157232	0.425703	0.623431
Shanxi	2022	0.64744	0.938315	0.872879	0.17407	0.420108	0.909659	0.15261	0.389558	0.698745
Gansu	2008	0.831469	0.99212	0.532258	0.174415	0.104129	0.605865	0.0150761	0.445783	0
Gansu	2009	0.815117	0.99137	0.523775	0.163754	0.111311	0.616861	0.0244631	0.483936	0.0585774
Gansu	2010	0.791735	0.990295	0.565352	0.170034	0.11909	0.645106	0.0383303	0.415663	0.0502092
Gansu	2011	0.837955	0.989049	0.602389	0.169894	0.131059	0.66947	0.0352724	0.423695	0.083682
Gansu	2012	0.759652	0.988762	0.639427	0.172738	0.202873	0.686503	0.0792206	0.453815	0.171548
Gansu	2013	0.745281	0.988312	0.663799	0.171538	0.336924	0.696852	0.118191	0.477912	0.259414
Gansu	2014	0.747495	0.98844	0.696057	0.175245	0.398564	0.720569	0.0949367	0.506024	0.205021
Gansu	2015	0.747767	0.988492	0.695221	0.169261	0.365051	0.717119	0.080074	0.60241	0.179916
Gansu	2016	0.750369	0.988621	0.716487	0.175739	0.467385	0.747089	0.0765183	0.646586	0.23431
Gansu	2017	0.739144	0.988113	0.714934	0.16488	0.52304	0.729409	0.0563931	0.658635	0.309623
Gansu	2018	0.729473	0.987719	0.735125	0.171916	0.45003	0.728762	0.047575	0.654618	0.422594
Gansu	2019	0.723375	0.98748	0.7454	0.171719	0.487732	0.74752	0.0479306	0.668675	0.422594
Gansu	2020	0.714363	0.987125	0.747431	0.167971	0.539797	0.736956	0.0573176	0.698795	0.435146
Gansu	2021	0.694127	0.986298	0.765233	0.170692	0.523639	0.751401	0.0544019	0.646586	0.435146
Gansu	2022	0.696186	0.986377	0.787694	0.174801	0.612208	0.777059	0.066989	0.616466	0.430962
Qinghai	2008	0.8827	1	0.75914	0.175229	0.143627	0.363519	0.0057602	0.636546	0.0962343
Qinghai	2009	0.880952	0.999984	0.783393	0.173166	0.119689	0.393489	0.00163561	0.694779	0.129707
Qinghai	2010	0.876058	0.999944	0.820908	0.172837	0.143627	0.3232	0.00497795	0.716867	0.146444
Qinghai	2011	0.868717	0.999889	0.848746	0.172311	0.210652	0.341958	0.0115204	0.702811	0.217573
Qinghai	2012	0.867242	0.999871	0.865472	0.17319	0.220227	0.380336	0.010027	0.712851	0.276151
Qinghai	2013	0.865494	0.999863	0.879092	0.173758	0.211251	0.371928	0.0189873	0.722892	0.221757
Qinghai	2014	0.86829	0.999872	0.891995	0.175081	0.278276	0.388961	0.0142227	0.763052	0.238494
Qinghai	2015	0.841568	0.999699	0.877897	0.145827	0.260323	0.479086	0.0177073	0.773092	0.16318
Qinghai	2016	0.824983	0.999582	0.873477	0.161642	0.278276	0.531695	0.0329256	0.736948	0.217573
Qinghai	2017	0.833023	0.999625	0.880884	0.187797	0.302214	0.501725	0.0221163	0.680723	0.280335
Qinghai	2018	0.827041	0.999584	0.887933	0.171382	0.318372	0.510349	0	0.658635	0.389121
Qinghai	2019	0.828556	0.999587	0.892593	0.1749	0.347098	0.545063	0.00440905	0.646586	0.301255
Qinghai	2020	0.833994	0.999616	0.896894	0.188142	0.378217	0.533851	0.000568909	0.672691	0.41841
Qinghai	2021	0.822613	0.999539	0.902389	0.169894	0.399761	0.513152	0.00341345	0.614458	0.41841
Qinghai	2022	0.824245	0.999548	0.911111	0.174991	0.425494	0.510134	0.00526241	0.508032	0.443515
Ningxia	2008	0.552163	0.965549	0	0.174736	0.291442	0	0.0148628	0.126506	0.497908
Ningxia	2009	0.516469	0.962457	0.289367	0.171226	0.528426	0.316731	0.0132983	0.483936	0.539749
Ningxia	2010	0.369572	0.950751	0.25675	0.164247	0.601436	0.368262	0.0174228	0.491968	0.539749
Ningxia	2011	0.255185	0.94146	0.292593	0.168086	0.59246	0.322337	0.0337079	0.485944	0.485356
Ningxia	2012	0.2795	0.942612	0.378734	0.17573	0.573309	0.382924	0.0324989	0.514056	0.523013
Ningxia	2013	0.276936	0.940696	0.415054	0.171497	0.681029	0.384217	0.0443749	0.540161	0.527197
Ningxia	2014	0.30863	0.942203	0.469773	0.177144	0.704967	0.401035	0.048784	0.560241	0.506276
Ningxia	2015	0.342694	0.944494	0.519594	0.179857	0.716936	0.415912	0.0546864	0.600402	0.502092
Ningxia	2016	0.342616	0.94358	0.55233	0.172812	0.728306	0.462484	0.0648556	0.616466	0.606695
Ningxia	2017	0.241552	0.934161	0.519355	0.158757	0.780371	0.453428	0.0529085	0.544177	0.606695
Ningxia	2018	0.178746	0.928312	0.513978	0.164839	0.852783	0.446313	0.0172095	0.558233	0.644351
Ningxia	2019	0.0836246	0.919368	0.458901	0.0876391	0.892879	0.442432	0.00689802	0.522088	0.644351
Ningxia	2020	0.087198	0.919227	0.482318	0.174012	0.891083	0.495041	0.0265965	0.534137	0.67364
Ningxia	2021	0.0143323	0.9124	0.514456	0.169845	0.858767	0.513799	0.0186318	0.419679	0.67364
Ningxia	2022	0.0038841	0.911117	0.561888	0.173338	1	0.487063	0.00654245	0.37751	0.682008
Xinjiang	2008	0.919288	0.999744	0.814576	0.173716	0.106523	0.772531	0.0268098	0.200803	0.251046
Xinjiang	2009	0.910472	0.999634	0.833811	0.128902	0.139437	0.78978	0.0484995	0.471888	0.435146
Xinjiang	2010	0.891906	0.999416	0.847551	0.169048	0.148414	0.803579	0.0486417	0.403614	0.439331
Xinjiang	2011	0.871864	0.999178	0.854839	0.168152	0.200479	0.792367	0.0872564	0.37751	0.447699
Xinjiang	2012	0.866465	0.999099	0.867264	0.171514	0.231598	0.735231	0.1743	0.433735	0.41841
Xinjiang	2013	0.858075	0.998961	0.872162	0.168768	0.236385	0.668823	0.219528	0.493976	0.439331
Xinjiang	2014	0.849802	0.998831	0.877419	0.169237	0.275883	0.624191	0.271939	0.508032	0.456067
Xinjiang	2015	0.834032	0.99859	0.862246	0	0.321364	0.566624	0.198194	0.606426	0.485356
Xinjiang	2016	0.832401	0.998529	0.863441	0.16802	0.364452	0.548297	0.215332	0.644578	0.527197
Xinjiang	2017	0.837528	0.998542	0.881243	0.174686	0.424895	0.562096	0.267032	0.600402	0.589958
Xinjiang	2018	0.828167	0.998386	0.887694	0.169804	0.489527	0.591203	0.064429	0.584337	0.610879
Xinjiang	2019	0.826925	0.998332	0.898088	0.172763	0.523639	0.611255	0.0674868	0.636546	0.585774
Xinjiang	2020	0.819234	0.998305	0.898566	0.168423	0.472172	0.581716	0.0982079	0.666667	0.627615
Xinjiang	2021	0.812087	0.998109	0.90681	0.170396	0.554758	0.599181	0.0767316	0.568273	0.627615
Xinjiang	2022	0.815078	0.99815	0.918757	0.175426	0.604428	0.630229	0.0591665	0.497992	0.648536

## Sheet: 指标全局权重
指标	权重
Z1	0.0578
Z2	0.0411
Z3	0.0253
Z4	0.0252
Z5	0.1692
Z6	0.0276
Z7	0.4875
Z8	0.0879
Z9	0.0785

## Sheet: 障碍度计算结果
地区	year	Z1_O	Z2_O	Z3_O	Z4_O	Z5_O	Z6_O	Z7_O	Z8_O	Z9_O
Beijing	2008	0.0097	0.0073	0.0022	0.0308	0.2138	0.0032	0.6476	0.0243	0.0612
Tianjin	2008	0.0199	0.0123	0.005	0.0271	0.1872	0.0042	0.6083	0.0625	0.0735
Hebei	2008	0.0236	0.0054	0.0145	0.0298	0.1936	0.0084	0.5996	0.0728	0.0522
Shanxi	2008	0.0294	0.0038	0.0203	0.0259	0.1915	0.0118	0.5502	0.1074	0.0597
Inner Mongolia	2008	0.0427	0.0005	0.0185	0.0286	0.163	0.0103	0.6092	0.0407	0.0865
Liaoning	2008	0.0197	0.0036	0.0089	0.0292	0.1909	0.0062	0.6079	0.0798	0.0538
Jilin	2008	0.0088	0.0009	0.0058	0.0286	0.1902	0.0038	0.6477	0.0314	0.0828
Heilongjiang	2008	0.0103	0.0005	0.0072	0.0277	0.1801	0.0042	0.6071	0.0826	0.0803
Shanghai	2008	0.0166	0.0359	0.0035	0.0277	0.2021	0.0042	0.5816	0.0762	0.0524
Jiangsu	2008	0.0277	0.013	0.0099	0.0345	0.1634	0.0071	0.5866	0.1186	0.0392
Zhejiang	2008	0.0187	0.0063	0.0064	0.0351	0.225	0.0077	0.5217	0.1123	0.0667
Anhui	2008	0.0143	0.0041	0.0148	0.0291	0.1904	0.0055	0.6144	0.0647	0.0629
Fujian	2008	0.0126	0.0031	0.0062	0.0289	0.1739	0.0062	0.639	0.0808	0.0495
Jiangxi	2008	0.009	0.0016	0.0097	0.0286	0.1701	0.0044	0.6552	0.0853	0.0361
Shandong	2008	0.0303	0.0114	0.0129	0.0362	0.1522	0.0059	0.5935	0.1004	0.0571
Henan	2008	0.0135	0.0049	0.0102	0.0274	0.1947	0.0065	0.5948	0.086	0.0621
Hubei	2008	0.0146	0.003	0.0109	0.0285	0.1859	0.0052	0.6279	0.0694	0.0547
Hunan	2008	0.0077	0.0018	0.007	0.0281	0.2035	0.0057	0.6204	0.0637	0.0621
Guangdong	2008	0.0109	0.0041	0.0044	0.0303	0.1679	0.0059	0.6321	0.099	0.0455
Guangxi	2008	0.0116	0.0016	0.0119	0.0283	0.1957	0.0061	0.623	0.0455	0.0763
Hainan	2008	0	0.0003	0.0012	0.0299	0.2014	0.0046	0.6992	0.0271	0.0363
Chongqing	2008	0.0095	0.0022	0.0082	0.028	0.1798	0.0052	0.628	0.0778	0.0613
Sichuan	2008	0.0053	0.0007	0.006	0.0284	0.1952	0.0054	0.6234	0.0705	0.0651
Guizhou	2008	0.0066	0.001	0.0119	0.0256	0.2084	0.0127	0.5959	0.0568	0.0811
Yunnan	2008	0.0049	0.0004	0.0069	0.027	0.1995	0.0089	0.6159	0.0608	0.0757
Shanxi	2008	0.0153	0.0019	0.0122	0.0277	0.1897	0.0057	0.6161	0.0831	0.0483
Gansu	2008	0.012	0.0004	0.0146	0.0256	0.1866	0.0134	0.5909	0.06	0.0966
Qinghai	2008	0.0087	0	0.0078	0.0265	0.1849	0.0224	0.6185	0.0408	0.0905
Ningxia	2008	0.0317	0.0017	0.031	0.0254	0.1467	0.0338	0.5876	0.0939	0.0482
Xinjiang	2008	0.0059	0	0.0059	0.0263	0.1911	0.0079	0.5997	0.0888	0.0743
Beijing	2009	0.0112	0.0088	0.0023	0.0357	0.1861	0.0032	0.717	0.0239	0.0118
Tianjin	2009	0.0237	0.0151	0.0052	0.0277	0.1896	0.0036	0.5979	0.0531	0.0842
Hebei	2009	0.0281	0.0064	0.0162	0.032	0.1779	0.0095	0.6104	0.0711	0.0485
Shanxi	2009	0.0334	0.0044	0.0217	0.0273	0.191	0.0109	0.5624	0.0926	0.0563
Inner Mongolia	2009	0.0455	0.0006	0.0157	0.0297	0.1613	0.0086	0.6222	0.0352	0.0813
Liaoning	2009	0.0219	0.004	0.0088	0.0303	0.1921	0.0058	0.6091	0.0732	0.0548
Jilin	2009	0.011	0.001	0.0062	0.0295	0.1842	0.0033	0.6539	0.0328	0.078
Heilongjiang	2009	0.011	0.0006	0.0074	0.0289	0.1732	0.0041	0.6273	0.074	0.0736
Shanghai	2009	0.0184	0.0407	0.0036	0.0283	0.2016	0.0037	0.585	0.0666	0.0521
Jiangsu	2009	0.0291	0.0136	0.0091	0.0343	0.16	0.0064	0.5953	0.1101	0.042
Zhejiang	2009	0.0172	0.0058	0.0055	0.0304	0.1771	0.0066	0.6115	0.0907	0.0552
Anhui	2009	0.0152	0.0043	0.0137	0.0295	0.1804	0.0054	0.6255	0.0676	0.0585
Fujian	2009	0.0135	0.0033	0.0058	0.0291	0.174	0.0057	0.6423	0.08	0.0462
Jiangxi	2009	0.0107	0.0019	0.0095	0.0301	0.1655	0.0042	0.6711	0.0815	0.0255
Shandong	2009	0.0334	0.0126	0.013	0.038	0.1426	0.0061	0.6028	0.1001	0.0513
Henan	2009	0.0143	0.0052	0.0103	0.028	0.1909	0.0068	0.5994	0.0858	0.0592
Hubei	2009	0.0167	0.0033	0.0107	0.0294	0.1886	0.0051	0.6162	0.0746	0.0554
Hunan	2009	0.0086	0.002	0.0066	0.0294	0.205	0.0053	0.6201	0.0619	0.0611
Guangdong	2009	0.0121	0.0046	0.0045	0.0324	0.1658	0.0056	0.6315	0.0979	0.0458
Guangxi	2009	0.013	0.0018	0.0122	0.0296	0.1888	0.0067	0.6268	0.0467	0.0745
Hainan	2009	0.0001	0.0003	0.0011	0.0308	0.1922	0.0044	0.7134	0.0195	0.0382
Chongqing	2009	0.0106	0.0025	0.007	0.03	0.1691	0.0044	0.6526	0.0704	0.0535
Sichuan	2009	0.0056	0.0007	0.0055	0.029	0.1878	0.0054	0.6323	0.0726	0.0612
Guizhou	2009	0.0074	0.001	0.0108	0.0257	0.2081	0.0118	0.5948	0.0499	0.0905
Yunnan	2009	0.0055	0.0005	0.0071	0.0286	0.1936	0.0093	0.6353	0.0593	0.0608
Shanxi	2009	0.0173	0.0021	0.0115	0.0289	0.1889	0.0049	0.6214	0.0751	0.0499
Gansu	2009	0.0134	0.0004	0.0151	0.0263	0.188	0.0132	0.5945	0.0567	0.0924
Qinghai	2009	0.0088	0	0.007	0.0267	0.1908	0.0214	0.6234	0.0344	0.0875
Ningxia	2009	0.0383	0.0021	0.0246	0.0286	0.1094	0.0259	0.6594	0.0622	0.0495
Xinjiang	2009	0.007	0	0.0057	0.0298	0.1975	0.0079	0.6291	0.063	0.0601
Beijing	2010	0.0116	0.0096	0.0021	0.0355	0.1986	0.0027	0.6969	0.0252	0.0178
Tianjin	2010	0.0253	0.0169	0.0047	0.0278	0.1926	0.0031	0.6033	0.0487	0.0774
Hebei	2010	0.0335	0.0078	0.0166	0.036	0.1502	0.0104	0.6243	0.0812	0.0402
Shanxi	2010	0.0358	0.0049	0.0193	0.028	0.1834	0.0102	0.5633	0.1029	0.0521
Inner Mongolia	2010	0.0538	0.0007	0.0155	0.0315	0.1596	0.009	0.6138	0.035	0.081
Liaoning	2010	0.0255	0.0047	0.0083	0.031	0.1893	0.0055	0.6209	0.0638	0.0511
Jilin	2010	0.0132	0.0012	0.0061	0.0305	0.1852	0.0031	0.6516	0.0341	0.075
Heilongjiang	2010	0.0122	0.0006	0.0067	0.0299	0.1681	0.0035	0.6391	0.0696	0.0702
Shanghai	2010	0.0192	0.044	0.0034	0.0272	0.2082	0.0035	0.5758	0.0695	0.0494
Jiangsu	2010	0.0337	0.0158	0.0087	0.0364	0.1684	0.0065	0.5736	0.1128	0.0441
Zhejiang	2010	0.0195	0.0067	0.0052	0.0327	0.1869	0.0066	0.5874	0.0959	0.0591
Anhui	2010	0.0174	0.0047	0.0122	0.0302	0.1745	0.0049	0.6211	0.0765	0.0585
Fujian	2010	0.0154	0.0037	0.0055	0.03	0.1722	0.005	0.6401	0.0866	0.0415
Jiangxi	2010	0.012	0.0021	0.0086	0.0322	0.1532	0.004	0.6743	0.0973	0.0162
Shandong	2010	0.0364	0.0139	0.0123	0.0394	0.1337	0.006	0.6095	0.0975	0.0514
Henan	2010	0.0158	0.0057	0.0093	0.0281	0.1933	0.0057	0.5989	0.0848	0.0583
Hubei	2010	0.018	0.0036	0.0092	0.0291	0.1868	0.0044	0.6141	0.0793	0.0555
Hunan	2010	0.0086	0.0021	0.0055	0.0289	0.1959	0.0035	0.6297	0.0656	0.0601
Guangdong	2010	0.037	0.0143	0.0118	0.092	0.4249	0.0151	0	0.2823	0.1227
Guangxi	2010	0.0151	0.0019	0.0107	0.0301	0.1898	0.0063	0.6255	0.0506	0.07
Hainan	2010	0.0003	0.0003	0.0009	0.0316	0.1781	0.0042	0.7309	0.0179	0.0358
Chongqing	2010	0.012	0.0028	0.0065	0.0325	0.1513	0.0045	0.669	0.0744	0.047
Sichuan	2010	0.0061	0.0007	0.0047	0.0292	0.1793	0.005	0.6442	0.0761	0.0547
Guizhou	2010	0.008	0.0011	0.0097	0.0265	0.1994	0.0114	0.61	0.0497	0.0842
Yunnan	2010	0.0061	0.0005	0.0066	0.0291	0.1913	0.009	0.6338	0.0663	0.0573
Shanxi	2010	0.0196	0.0024	0.0104	0.0301	0.1778	0.0047	0.6188	0.0818	0.0545
Gansu	2010	0.0151	0.0005	0.0138	0.0262	0.1868	0.0123	0.5875	0.0644	0.0934
Qinghai	2010	0.0093	0	0.0059	0.027	0.1874	0.0242	0.6275	0.0322	0.0867
Ningxia	2010	0.0504	0.0028	0.026	0.0291	0.0933	0.0241	0.6625	0.0618	0.05
Xinjiang	2010	0.0084	0	0.0052	0.0283	0.1945	0.0073	0.6261	0.0708	0.0594
Beijing	2011	0.0115	0.0098	0.0018	0.035	0.1953	0.0022	0.6991	0.0222	0.0231
Tianjin	2011	0.0272	0.019	0.0043	0.0299	0.1818	0.0029	0.6163	0.0468	0.072
Hebei	2011	0.0421	0.0098	0.0173	0.0422	0.1754	0.011	0.5544	0.0969	0.051
Shanxi	2011	0.0406	0.0055	0.0179	0.0288	0.1768	0.0095	0.558	0.1107	0.0521
Inner Mongolia	2011	0.0668	0.0008	0.0156	0.0356	0.1445	0.0098	0.6029	0.0361	0.0879
Liaoning	2011	0.0301	0.0055	0.0081	0.0342	0.2038	0.0052	0.5909	0.0683	0.0538
Jilin	2011	0.0149	0.0014	0.0055	0.0303	0.1803	0.0025	0.6594	0.0317	0.0741
Heilongjiang	2011	0.0131	0.0007	0.0058	0.0306	0.1691	0.003	0.6434	0.0692	0.0651
Shanghai	2011	0.0197	0.046	0.0031	0.0272	0.2087	0.003	0.5739	0.0687	0.0496
Jiangsu	2011	0.0395	0.0185	0.0085	0.0391	0.1798	0.0063	0.5446	0.1165	0.0473
Zhejiang	2011	0.0204	0.007	0.0046	0.0315	0.1688	0.0059	0.6147	0.0906	0.0564
Anhui	2011	0.0203	0.0055	0.0113	0.0323	0.1715	0.0045	0.6153	0.087	0.0523
Fujian	2011	0.018	0.0043	0.0053	0.0314	0.1691	0.005	0.634	0.0914	0.0414
Jiangxi	2011	0.0141	0.0025	0.008	0.034	0.154	0.0039	0.6625	0.1051	0.016
Shandong	2011	0.0427	0.0163	0.0124	0.0433	0.1436	0.0061	0.5766	0.1025	0.0565
Henan	2011	0.0177	0.0063	0.0088	0.0287	0.1934	0.006	0.595	0.0846	0.0594
Hubei	2011	0.0205	0.0041	0.0085	0.031	0.1917	0.0044	0.5963	0.0879	0.0557
Hunan	2011	0.0096	0.0023	0.0048	0.0291	0.1981	0.004	0.6232	0.0694	0.0596
Guangdong	2011	0.0161	0.0062	0.0044	0.0353	0.1449	0.0052	0.633	0.1068	0.0481
Guangxi	2011	0.0171	0.0022	0.0098	0.031	0.1774	0.0057	0.6447	0.0518	0.0604
Hainan	2011	0.0003	0.0003	0.0007	0.0321	0.1611	0.0039	0.7412	0.0198	0.0405
Chongqing	2011	0.0144	0.0034	0.0061	0.0368	0.0887	0.0043	0.7071	0.0837	0.0556
Sichuan	2011	0.0072	0.0008	0.0043	0.0303	0.1779	0.0054	0.6417	0.0771	0.0553
Guizhou	2011	0.0088	0.0012	0.0084	0.0272	0.2061	0.0105	0.6121	0.0505	0.0751
Yunnan	2011	0.007	0.0006	0.006	0.0302	0.1837	0.009	0.6486	0.0624	0.0526
Shanxi	2011	0.0218	0.0026	0.0092	0.03	0.166	0.0041	0.6279	0.0861	0.0523
Gansu	2011	0.0119	0.0006	0.0127	0.0265	0.1861	0.0116	0.5954	0.0641	0.0911
Qinghai	2011	0.0101	0	0.0051	0.0277	0.1773	0.0241	0.6396	0.0347	0.0815
Ningxia	2011	0.0591	0.0033	0.0246	0.0288	0.0946	0.0257	0.6465	0.062	0.0554
Xinjiang	2011	0.0103	0	0.0051	0.0293	0.1889	0.008	0.6214	0.0764	0.0605
Beijing	2012	0.0128	0.0112	0.0018	0.0384	0.2042	0.0022	0.6843	0.0234	0.0217
Tianjin	2012	0.0265	0.0193	0.0037	0.0298	0.1784	0.0025	0.6251	0.0445	0.0701
Hebei	2012	0.0391	0.0091	0.0148	0.0381	0.1634	0.0093	0.5887	0.0848	0.0528
Shanxi	2012	0.0448	0.0061	0.0184	0.0305	0.1776	0.01	0.5503	0.1087	0.0537
Inner Mongolia	2012	0.0722	0.0009	0.0152	0.0377	0.1341	0.0104	0.609	0.0396	0.0808
Liaoning	2012	0.039	0.0071	0.0093	0.0422	0.2442	0.0055	0.5128	0.0762	0.0636
Jilin	2012	0.0153	0.0014	0.0049	0.0303	0.1752	0.0031	0.6627	0.0311	0.076
Heilongjiang	2012	0.0138	0.0007	0.0056	0.0319	0.1721	0.0027	0.6366	0.0671	0.0695
Shanghai	2012	0.02	0.0473	0.003	0.0272	0.2077	0.0028	0.5786	0.0641	0.0492
Jiangsu	2012	0.0433	0.0203	0.0084	0.0416	0.1858	0.0064	0.5243	0.1203	0.0497
Zhejiang	2012	0.0225	0.0077	0.0047	0.0346	0.1745	0.0061	0.5998	0.0959	0.0541
Anhui	2012	0.0216	0.0059	0.0107	0.0332	0.1761	0.0046	0.5997	0.0905	0.0576
Fujian	2012	0.0187	0.0045	0.0049	0.032	0.1672	0.0045	0.6362	0.0925	0.0394
Jiangxi	2012	0.0153	0.0027	0.0078	0.0358	0.1518	0.0037	0.6543	0.1072	0.0214
Shandong	2012	0.049	0.0187	0.0129	0.0484	0.152	0.0063	0.5447	0.1094	0.0587
Henan	2012	0.0189	0.0067	0.0085	0.0295	0.1951	0.0058	0.5921	0.0834	0.06
Hubei	2012	0.022	0.0044	0.008	0.0317	0.1897	0.0039	0.5952	0.0906	0.0544
Hunan	2012	0.0101	0.0024	0.0045	0.0301	0.2046	0.0035	0.6131	0.071	0.0606
Guangdong	2012	0.0161	0.0062	0.0041	0.0347	0.1183	0.005	0.667	0.1016	0.047
Guangxi	2012	0.0187	0.0024	0.0096	0.0318	0.176	0.0052	0.6466	0.0481	0.0615
Hainan	2012	0.0004	0.0003	0.0006	0.0321	0.1688	0.0039	0.7321	0.0182	0.0435
Chongqing	2012	0.0142	0.0034	0.0052	0.0358	0.0821	0.0034	0.7334	0.0835	0.039
Sichuan	2012	0.0075	0.0009	0.0039	0.031	0.1817	0.0047	0.639	0.077	0.0543
Guizhou	2012	0.009	0.0012	0.0071	0.0282	0.1845	0.0098	0.6324	0.0521	0.0756
Yunnan	2012	0.0079	0.0006	0.0057	0.0306	0.1835	0.0084	0.65	0.0629	0.0504
Shanxi	2012	0.0223	0.0027	0.0081	0.0306	0.1675	0.0038	0.6293	0.0905	0.0454
Gansu	2012	0.0185	0.0006	0.0122	0.0278	0.1799	0.0115	0.5987	0.064	0.0867
Qinghai	2012	0.0103	0	0.0046	0.0279	0.1769	0.0229	0.6473	0.0339	0.0762
Ningxia	2012	0.0577	0.0033	0.0218	0.0288	0.1001	0.0236	0.6537	0.0592	0.0519
Xinjiang	2012	0.0116	0.0001	0.005	0.0313	0.1948	0.011	0.6032	0.0746	0.0684
Beijing	2013	0.0135	0.0121	0.0017	0.0416	0.205	0.0019	0.6816	0.0247	0.0177
Tianjin	2013	0.028	0.0204	0.0035	0.0307	0.1767	0.002	0.6242	0.0426	0.0719
Hebei	2013	0.0415	0.0097	0.0147	0.0386	0.1637	0.0092	0.5905	0.0802	0.0519
Shanxi	2013	0.0486	0.0065	0.0187	0.0313	0.1764	0.0102	0.5589	0.1013	0.0481
Inner Mongolia	2013	0.0823	0.001	0.0161	0.0403	0.1154	0.0113	0.6051	0.0427	0.0857
Liaoning	2013	0.033	0.006	0.0071	0.0344	0.1964	0.0043	0.61	0.057	0.0519
Jilin	2013	0.0162	0.0014	0.0046	0.0304	0.1635	0.0017	0.6633	0.0307	0.0882
Heilongjiang	2013	0.0158	0.0008	0.0057	0.0337	0.1753	0.0027	0.6253	0.0675	0.0731
Shanghai	2013	0.0203	0.0495	0.003	0.028	0.2138	0.0028	0.5714	0.0611	0.0502
Jiangsu	2013	0.0528	0.0256	0.0097	0.05	0.2136	0.0076	0.4432	0.1396	0.0581
Zhejiang	2013	0.0221	0.0081	0.0045	0.0352	0.1773	0.0061	0.5988	0.0954	0.0525
Anhui	2013	0.0263	0.0071	0.0117	0.0375	0.1879	0.0053	0.5645	0.1017	0.0582
Fujian	2013	0.0191	0.0048	0.0046	0.0335	0.1673	0.0046	0.632	0.0971	0.037
Jiangxi	2013	0.015	0.0026	0.0068	0.0341	0.1443	0.0035	0.6665	0.1021	0.0252
Shandong	2013	0.0574	0.022	0.0138	0.0542	0.1581	0.0068	0.51	0.1165	0.0612
Henan	2013	0.0202	0.0073	0.0085	0.0312	0.2004	0.0053	0.5838	0.0835	0.0598
Hubei	2013	0.0226	0.0045	0.0073	0.0314	0.183	0.0032	0.6069	0.0834	0.0578
Hunan	2013	0.0108	0.0025	0.0042	0.031	0.2084	0.0024	0.6091	0.0719	0.0596
Guangdong	2013	0.0168	0.0069	0.0041	0.037	0.1237	0.005	0.6533	0.105	0.0483
Guangxi	2013	0.0195	0.0025	0.0092	0.0325	0.1792	0.0051	0.6472	0.0429	0.0619
Hainan	2013	0.0003	0.0004	0.0005	0.0324	0.1633	0.004	0.7491	0.0107	0.0393
Chongqing	2013	0.015	0.0036	0.005	0.0354	0.0821	0.0034	0.7282	0.0823	0.045
Sichuan	2013	0.0079	0.0009	0.0037	0.0322	0.1817	0.004	0.6323	0.0795	0.0578
Guizhou	2013	0.0105	0.0015	0.0072	0.03	0.1659	0.0094	0.6491	0.0544	0.072
Yunnan	2013	0.0087	0.0007	0.0054	0.0315	0.1874	0.0084	0.6368	0.0617	0.0594
Shanxi	2013	0.024	0.0029	0.0079	0.0315	0.1685	0.0037	0.6226	0.0915	0.0474
Gansu	2013	0.0211	0.0007	0.0122	0.0299	0.1605	0.012	0.6149	0.0656	0.0832
Qinghai	2013	0.0104	0	0.0041	0.0279	0.1789	0.0232	0.641	0.0326	0.0819
Ningxia	2013	0.0602	0.0035	0.0213	0.0301	0.0777	0.0245	0.671	0.0582	0.0535
Xinjiang	2013	0.0128	0.0001	0.0051	0.0327	0.202	0.0143	0.5947	0.0695	0.0688
Beijing	2014	0.0168	0.0154	0.002	0.0523	0.1752	0.002	0.6883	0.0283	0.0198
Tianjin	2014	0.0295	0.0217	0.0034	0.0316	0.2009	0.0018	0.5966	0.0406	0.074
Hebei	2014	0.0421	0.0098	0.0144	0.0382	0.1548	0.0089	0.607	0.0775	0.0473
Shanxi	2014	0.0473	0.0063	0.0179	0.0303	0.173	0.0099	0.5764	0.0917	0.0472
Inner Mongolia	2014	0.0901	0.0011	0.0166	0.0442	0.0871	0.0134	0.6305	0.047	0.07
Liaoning	2014	0.0328	0.0059	0.0067	0.0334	0.1821	0.0039	0.6356	0.0486	0.051
Jilin	2014	0.0168	0.0015	0.0044	0.031	0.1629	0.0016	0.6814	0.0318	0.0686
Heilongjiang	2014	0.0149	0.0007	0.005	0.0317	0.1666	0.0024	0.6552	0.0541	0.0694
Shanghai	2014	0.0215	0.0525	0.0028	0.029	0.2183	0.0023	0.562	0.0596	0.052
Jiangsu	2014	0.0538	0.0263	0.009	0.0507	0.2079	0.0067	0.4522	0.1358	0.0576
Zhejiang	2014	0.0238	0.0088	0.0046	0.0374	0.1802	0.006	0.5847	0.1014	0.0529
Anhui	2014	0.0261	0.007	0.0106	0.0365	0.1708	0.0047	0.5989	0.096	0.0494
Fujian	2014	0.0182	0.0047	0.004	0.032	0.1569	0.0043	0.6515	0.093	0.0353
Jiangxi	2014	0.0148	0.0026	0.0061	0.0339	0.1438	0.0033	0.6698	0.0978	0.0278
Shandong	2014	0.0573	0.0221	0.0127	0.0537	0.1499	0.0062	0.5298	0.1088	0.0593
Henan	2014	0.02	0.0073	0.0078	0.0316	0.1986	0.0048	0.5905	0.0821	0.0574
Hubei	2014	0.0242	0.0048	0.0071	0.0327	0.186	0.0028	0.5965	0.0848	0.0612
Hunan	2014	0.0107	0.0025	0.0038	0.0312	0.1977	0.002	0.6267	0.07	0.0553
Guangdong	2014	0.0161	0.0067	0.0037	0.036	0.115	0.0048	0.6679	0.102	0.0478
Guangxi	2014	0.0195	0.0025	0.0084	0.0323	0.1829	0.0049	0.6534	0.0427	0.0535
Hainan	2014	0.0001	0.0003	0.0004	0.0323	0.1552	0.0038	0.7539	0.0105	0.0435
Chongqing	2014	0.0155	0.0037	0.0046	0.0344	0.0977	0.003	0.7113	0.0801	0.0497
Sichuan	2014	0.0081	0.0009	0.0035	0.0331	0.1867	0.0038	0.6226	0.077	0.0643
Guizhou	2014	0.011	0.0016	0.0066	0.0313	0.1577	0.0086	0.6504	0.0548	0.0781
Yunnan	2014	0.0084	0.0007	0.0047	0.031	0.1788	0.0079	0.6538	0.0574	0.0573
Shanxi	2014	0.0249	0.003	0.0074	0.0329	0.1662	0.0036	0.6212	0.0923	0.0484
Gansu	2014	0.0208	0.0007	0.011	0.0297	0.1454	0.011	0.6303	0.062	0.0891
Qinghai	2014	0.0104	0	0.0037	0.0284	0.167	0.0231	0.6571	0.0285	0.0817
Ningxia	2014	0.0584	0.0035	0.0196	0.0303	0.073	0.0242	0.6779	0.0565	0.0567
Xinjiang	2014	0.0143	0.0001	0.0051	0.0345	0.202	0.0171	0.5852	0.0713	0.0704
Beijing	2015	0.0145	0.0134	0.0015	0.0448	0.1487	0.0014	0.7473	0.0186	0.0099
Tianjin	2015	0.0265	0.0197	0.0029	0.0296	0.1842	0.0015	0.6399	0.0328	0.063
Hebei	2015	0.0383	0.009	0.013	0.0352	0.154	0.0079	0.6201	0.0728	0.0496
Shanxi	2015	0.0475	0.0063	0.018	0	0.1761	0.0097	0.6221	0.0708	0.0493
Inner Mongolia	2015	0.0882	0.0011	0.0161	0.0422	0.0758	0.014	0.6412	0.0482	0.0732
Liaoning	2015	0.0329	0.0059	0.0067	0.029	0.1881	0.0038	0.6399	0.0426	0.0512
Jilin	2015	0.0166	0.0014	0.0039	0.031	0.1594	0.0012	0.6895	0.0285	0.0686
Heilongjiang	2015	0.0151	0.0007	0.005	0.0307	0.1687	0.0025	0.6697	0.0371	0.0705
Shanghai	2015	0.0224	0.0544	0.0028	0.0289	0.213	0.0021	0.5731	0.052	0.0513
Jiangsu	2015	0.0552	0.0272	0.0085	0.0544	0.2208	0.0066	0.4228	0.1439	0.0605
Zhejiang	2015	0.0233	0.0088	0.0043	0.0368	0.1725	0.0055	0.5976	0.0978	0.0533
Anhui	2015	0.0269	0.0073	0.0103	0.0372	0.1711	0.0047	0.6042	0.0879	0.0504
Fujian	2015	0.0183	0.0047	0.0037	0.0329	0.1583	0.0038	0.6523	0.0904	0.0354
Jiangxi	2015	0.0149	0.0026	0.0057	0.034	0.1471	0.0033	0.6696	0.0921	0.0306
Shandong	2015	0.0514	0.02	0.0108	0.0483	0.1286	0.007	0.5808	0.0961	0.0571
Henan	2015	0.0199	0.0073	0.0073	0.0317	0.1959	0.0043	0.5925	0.0805	0.0606
Hubei	2015	0.0231	0.0046	0.0063	0.0314	0.1808	0.0023	0.6121	0.0783	0.061
Hunan	2015	0.0128	0.003	0.0042	0.038	0.238	0.0021	0.557	0.0842	0.0607
Guangdong	2015	0.0158	0.0068	0.0034	0.0366	0.0969	0.0044	0.6854	0.1022	0.0485
Guangxi	2015	0.0196	0.0026	0.0079	0.0333	0.1828	0.0047	0.6431	0.0417	0.0644
Hainan	2015	0.0002	0.0003	0.0003	0.0321	0.1533	0.0039	0.7404	0.0087	0.0609
Chongqing	2015	0.0154	0.0037	0.0041	0.0339	0.0963	0.0024	0.7197	0.0737	0.0507
Sichuan	2015	0.0076	0.0009	0.0031	0.0324	0.1726	0.0033	0.652	0.0708	0.0571
Guizhou	2015	0.0102	0.0015	0.0054	0.0313	0.1514	0.0073	0.6697	0.0541	0.069
Yunnan	2015	0.008	0.0006	0.0042	0.0307	0.1838	0.0066	0.6541	0.0512	0.0607
Shanxi	2015	0.0248	0.003	0.0073	0.0328	0.1627	0.0035	0.6378	0.0809	0.0473
Gansu	2015	0.0206	0.0007	0.0109	0.0296	0.152	0.011	0.6346	0.0495	0.0911
Qinghai	2015	0.0124	0	0.0042	0.0292	0.1696	0.0195	0.649	0.027	0.089
Ningxia	2015	0.0565	0.0034	0.0181	0.0307	0.0713	0.024	0.6856	0.0523	0.0581
Xinjiang	2015	0.0152	0.0001	0.0055	0.0399	0.182	0.019	0.6195	0.0548	0.064
Beijing	2016	0.0163	0.0154	0.0014	0.0556	0.186	0.0015	0.6919	0.0195	0.0124
Tianjin	2016	0.0251	0.0188	0.0025	0.0291	0.1742	0.0012	0.6636	0.0273	0.0581
Hebei	2016	0.0375	0.0089	0.0118	0.0366	0.1521	0.0075	0.6208	0.0728	0.0521
Shanxi	2016	0.0539	0.0072	0.0199	0.0367	0.1966	0.0113	0.5459	0.0746	0.054
Inner Mongolia	2016	0.0854	0.001	0.0153	0.042	0.0622	0.0135	0.6663	0.0491	0.0651
Liaoning	2016	0.0283	0.0051	0.0075	0.0308	0.1721	0.0054	0.6348	0.0511	0.065
Jilin	2016	0.0164	0.0014	0.0039	0.0313	0.1448	0.0013	0.6976	0.0299	0.0734
Heilongjiang	2016	0.0155	0.0007	0.0049	0.0322	0.1714	0.0026	0.6673	0.0323	0.0733
Shanghai	2016	0.0209	0.0513	0.0022	0.0289	0.2121	0.0018	0.5858	0.0456	0.0513
Jiangsu	2016	0.0473	0.0235	0.0066	0.0475	0.1861	0.0054	0.5149	0.1169	0.0517
Zhejiang	2016	0.0263	0.0101	0.0044	0.0426	0.2007	0.0063	0.544	0.1064	0.0592
Anhui	2016	0.0286	0.0078	0.0098	0.0394	0.169	0.0048	0.6021	0.0882	0.0503
Fujian	2016	0.0176	0.0046	0.0032	0.0325	0.1547	0.0035	0.6658	0.0846	0.0334
Jiangxi	2016	0.0159	0.0028	0.0055	0.0359	0.1516	0.0034	0.6596	0.0901	0.0351
Shandong	2016	0.057	0.0224	0.0111	0.0531	0.1271	0.0074	0.561	0.098	0.0627
Henan	2016	0.0203	0.0075	0.0069	0.0334	0.2023	0.0041	0.5895	0.0804	0.0555
Hubei	2016	0.0257	0.0052	0.0063	0.0356	0.2057	0.0024	0.5654	0.085	0.0687
Hunan	2016	0.0109	0.0026	0.0032	0.0321	0.1912	0.0015	0.6488	0.0633	0.0465
Guangdong	2016	0.0167	0.0073	0.0032	0.0393	0.0951	0.0044	0.687	0.1011	0.0459
Guangxi	2016	0.02	0.0026	0.0075	0.0328	0.1755	0.0041	0.6578	0.037	0.0627
Hainan	2016	0.0002	0.0004	0.0003	0.0322	0.169	0.0037	0.7412	0.0049	0.0481
Chongqing	2016	0.016	0.0039	0.0038	0.0343	0.0995	0.0021	0.7247	0.067	0.0486
Sichuan	2016	0.0078	0.0009	0.0029	0.0348	0.1757	0.0033	0.6531	0.067	0.0544
Guizhou	2016	0.0117	0.0017	0.0055	0.0326	0.1235	0.0069	0.6982	0.0537	0.0663
Yunnan	2016	0.008	0.0006	0.0039	0.0315	0.1766	0.0058	0.6672	0.0468	0.0597
Shanxi	2016	0.0255	0.0032	0.007	0.0339	0.1743	0.0038	0.622	0.0784	0.052
Gansu	2016	0.0212	0.0007	0.0105	0.0305	0.1323	0.0102	0.6608	0.0456	0.0882
Qinghai	2016	0.0139	0	0.0044	0.0291	0.1683	0.0178	0.6498	0.0319	0.0847
Ningxia	2016	0.0581	0.0035	0.0173	0.0319	0.0703	0.0227	0.6973	0.0516	0.0472
Xinjiang	2016	0.016	0.0001	0.0057	0.0347	0.1777	0.0206	0.6322	0.0516	0.0613
Beijing	2017	0.0169	0.0158	0.0013	0.056	0.1803	0.0012	0.6982	0.018	0.0123
Tianjin	2017	0.0276	0.0201	0.0025	0.031	0.1309	0.0011	0.6938	0.0294	0.0635
Hebei	2017	0.0437	0.0104	0.013	0.0426	0.1724	0.0086	0.575	0.0806	0.0538
Shanxi	2017	0.0472	0.0063	0.0145	0.0318	0.1679	0.0089	0.6024	0.0749	0.0461
Inner Mongolia	2017	0.0862	0.0011	0.0175	0.0392	0.0611	0.0168	0.6551	0.0633	0.0598
Liaoning	2017	0.031	0.0056	0.0077	0.0326	0.1698	0.0056	0.6462	0.055	0.0465
Jilin	2017	0.0164	0.0014	0.0037	0.0309	0.1713	0.0014	0.6771	0.0299	0.0678
Heilongjiang	2017	0.0163	0.0007	0.0048	0.032	0.1698	0.0025	0.6754	0.0273	0.0712
Shanghai	2017	0.0209	0.0512	0.002	0.0286	0.2036	0.0016	0.5975	0.0465	0.0482
Jiangsu	2017	0.0465	0.0232	0.0058	0.0459	0.176	0.0048	0.5351	0.1135	0.0492
Zhejiang	2017	0.023	0.009	0.0035	0.0375	0.1736	0.0054	0.6015	0.0909	0.0556
Anhui	2017	0.0294	0.008	0.0091	0.04	0.1658	0.0046	0.6072	0.0879	0.048
Fujian	2017	0.0188	0.005	0.0031	0.034	0.1437	0.0034	0.6734	0.086	0.0327
Jiangxi	2017	0.0162	0.0028	0.0051	0.0365	0.1481	0.0036	0.6693	0.0919	0.0265
Shandong	2017	0.0675	0.0267	0.0124	0.0624	0.1516	0.0079	0.4853	0.1105	0.0757
Henan	2017	0.025	0.0093	0.0076	0.0412	0.2171	0.0048	0.5314	0.096	0.0676
Hubei	2017	0.0256	0.0052	0.0057	0.0353	0.2031	0.0022	0.5764	0.0831	0.0634
Hunan	2017	0.0109	0.0026	0.003	0.0323	0.2022	0.0015	0.6447	0.059	0.0439
Guangdong	2017	0.0167	0.0075	0.0029	0.04	0.0896	0.0041	0.7	0.0995	0.0398
Guangxi	2017	0.0201	0.0027	0.0075	0.0329	0.1655	0.0044	0.6698	0.0421	0.0551
Hainan	2017	0.0002	0.0004	0.0002	0.0326	0.1693	0.0035	0.7393	0.0047	0.0499
Chongqing	2017	0.017	0.0042	0.0037	0.036	0.1013	0.0021	0.7153	0.0665	0.0539
Sichuan	2017	0.0079	0.001	0.0026	0.0354	0.1787	0.0029	0.6542	0.0625	0.0548
Guizhou	2017	0.0129	0.0019	0.0053	0.0346	0.1272	0.0071	0.6885	0.0529	0.0696
Yunnan	2017	0.0081	0.0007	0.0035	0.0319	0.1756	0.0058	0.6754	0.0443	0.0548
Shanxi	2017	0.0256	0.0032	0.0062	0.0341	0.1691	0.0037	0.6254	0.0795	0.0532
Gansu	2017	0.0223	0.0007	0.0107	0.0311	0.1193	0.011	0.6803	0.0444	0.0801
Qinghai	2017	0.0133	0	0.0041	0.0282	0.1626	0.0189	0.6564	0.0386	0.0778
Ningxia	2017	0.0659	0.0041	0.0183	0.0319	0.0559	0.0227	0.6945	0.0603	0.0464
Xinjiang	2017	0.0166	0.0001	0.0053	0.0367	0.1715	0.0213	0.6299	0.0619	0.0567
Beijing	2018	0.0156	0.0146	0.001	0.0505	0.1604	0.001	0.731	0.0154	0.0103
Tianjin	2018	0.0281	0.0199	0.0025	0.03	0.1858	0.0012	0.647	0.0303	0.0551
Hebei	2018	0.0368	0.0087	0.0103	0.0343	0.1422	0.0069	0.662	0.0585	0.0402
Shanxi	2018	0.0465	0.0062	0.0132	0.0304	0.1555	0.0085	0.6344	0.0696	0.0358
Inner Mongolia	2018	0.0745	0.0009	0.014	0.0328	0.0685	0.0152	0.6926	0.0537	0.0479
Liaoning	2018	0.0308	0.0055	0.007	0.0304	0.1588	0.0052	0.6669	0.0523	0.0429
Jilin	2018	0.0184	0.0015	0.0041	0.0336	0.1442	0.0017	0.7124	0.0313	0.0528
Heilongjiang	2018	0.0168	0.0007	0.0047	0.0312	0.158	0.0026	0.6945	0.026	0.0655
Shanghai	2018	0.0215	0.0527	0.0019	0.0288	0.2	0.0014	0.5867	0.0481	0.0588
Jiangsu	2018	0.0399	0.02	0.0046	0.038	0.1505	0.0038	0.6123	0.0927	0.0382
Zhejiang	2018	0.0217	0.0086	0.0031	0.0349	0.1544	0.005	0.6429	0.0839	0.0456
Anhui	2018	0.0291	0.0079	0.0081	0.0366	0.1444	0.0042	0.6507	0.0783	0.0407
Fujian	2018	0.0198	0.0053	0.0029	0.0343	0.1368	0.0033	0.6785	0.0905	0.0286
Jiangxi	2018	0.0171	0.003	0.0049	0.0368	0.1457	0.0036	0.6785	0.0855	0.0249
Shandong	2018	0.0482	0.0191	0.0084	0.0435	0.1094	0.0058	0.6396	0.0715	0.0546
Henan	2018	0.0231	0.0086	0.0065	0.0369	0.1813	0.0043	0.6076	0.0807	0.051
Hubei	2018	0.0243	0.0049	0.0049	0.0323	0.178	0.002	0.623	0.0753	0.0553
Hunan	2018	0.0108	0.0025	0.0027	0.0312	0.1795	0.0015	0.678	0.0515	0.0423
Guangdong	2018	0.0154	0.007	0.0025	0.0363	0.0791	0.0036	0.7314	0.0877	0.0371
Guangxi	2018	0.0202	0.0027	0.0068	0.0321	0.1526	0.0049	0.6944	0.0408	0.0455
Hainan	2018	0.0002	0.0004	0.0002	0.0315	0.193	0.0033	0.7261	0.0051	0.0402
Chongqing	2018	0.017	0.0042	0.0035	0.0353	0.0973	0.0024	0.7344	0.0616	0.0443
Sichuan	2018	0.0083	0.001	0.0024	0.0364	0.1747	0.0031	0.6656	0.0626	0.0459
Guizhou	2018	0.0127	0.0019	0.0047	0.0327	0.1161	0.0065	0.7224	0.0497	0.0534
Yunnan	2018	0.0083	0.0007	0.0032	0.0316	0.1687	0.0057	0.6851	0.0465	0.0503
Shanxi	2018	0.0252	0.0031	0.0054	0.0307	0.1642	0.003	0.6477	0.07	0.0505
Gansu	2018	0.0229	0.0007	0.0098	0.0305	0.136	0.0109	0.6786	0.0444	0.0662
Qinghai	2018	0.0137	0	0.0039	0.0287	0.1584	0.0186	0.6696	0.0412	0.0659
Ningxia	2018	0.0709	0.0044	0.0184	0.0314	0.0372	0.0228	0.7153	0.058	0.0417
Xinjiang	2018	0.0152	0.0001	0.0043	0.032	0.1319	0.0172	0.6968	0.0558	0.0467
Beijing	2019	0.0161	0.015	0.0008	0.0517	0.1619	0.0004	0.7352	0.0083	0.0106
Tianjin	2019	0.029	0.0205	0.0036	0.028	0.1858	0.0025	0.6265	0.0497	0.0544
Hebei	2019	0.0394	0.0094	0.0114	0.0344	0.1454	0.0079	0.6453	0.0655	0.0414
Shanxi	2019	0.0484	0.0064	0.0135	0.0313	0.154	0.0091	0.6255	0.0752	0.0367
Inner Mongolia	2019	0.0754	0.0009	0.0142	0.0296	0.0641	0.0166	0.6941	0.0584	0.0468
Liaoning	2019	0.031	0.0055	0.0072	0.029	0.1559	0.0055	0.6684	0.0555	0.0419
Jilin	2019	0.018	0.0015	0.0052	0.0304	0.1523	0.0031	0.6913	0.0474	0.0508
Heilongjiang	2019	0.0167	0.0007	0.0056	0.03	0.152	0.0036	0.6741	0.0367	0.0805
Shanghai	2019	0.0223	0.0546	0.0017	0.0286	0.1958	0.0009	0.6013	0.0363	0.0585
Jiangsu	2019	0.0402	0.0201	0.0043	0.0374	0.1425	0.0034	0.6283	0.0863	0.0376
Zhejiang	2019	0.0212	0.0086	0.0027	0.0347	0.1486	0.0045	0.6581	0.0764	0.0454
Anhui	2019	0.0296	0.008	0.0065	0.037	0.1449	0.0033	0.6661	0.0628	0.0415
Fujian	2019	0.02	0.0053	0.0024	0.0343	0.1301	0.0026	0.6989	0.0778	0.0286
Jiangxi	2019	0.0177	0.0031	0.0044	0.0378	0.1529	0.0034	0.6739	0.0811	0.0257
Shandong	2019	0.0458	0.0182	0.0087	0.0399	0.1028	0.0065	0.653	0.0745	0.0506
Henan	2019	0.0253	0.0094	0.0063	0.0393	0.1764	0.0035	0.609	0.0765	0.0544
Hubei	2019	0.0266	0.0054	0.0045	0.0337	0.178	0.0017	0.6232	0.069	0.0579
Hunan	2019	0.0109	0.0026	0.0024	0.0314	0.1687	0.0015	0.6862	0.0536	0.0427
Guangdong	2019	0.0166	0.0076	0.0024	0.039	0.0893	0.0035	0.7145	0.0869	0.04
Guangxi	2019	0.0202	0.0027	0.0066	0.0323	0.1467	0.0055	0.7	0.0401	0.0459
Hainan	2019	0.0001	0.0004	0.0001	0.0316	0.1888	0.0033	0.7321	0.0032	0.0404
Chongqing	2019	0.0171	0.0043	0.003	0.0352	0.1068	0.0019	0.7344	0.0529	0.0445
Sichuan	2019	0.0083	0.001	0.002	0.0376	0.1615	0.0028	0.6813	0.0578	0.0476
Guizhou	2019	0.0128	0.0019	0.0042	0.0332	0.1044	0.0058	0.7367	0.0465	0.0545
Yunnan	2019	0.0084	0.0007	0.0024	0.0322	0.1717	0.0044	0.6928	0.0361	0.0513
Shanxi	2019	0.0252	0.0031	0.0087	0.029	0.1566	0.0074	0.6013	0.1211	0.0475
Gansu	2019	0.0237	0.0008	0.0095	0.0309	0.1282	0.0103	0.6865	0.0431	0.067
Qinghai	2019	0.0136	0	0.0037	0.0286	0.1518	0.0173	0.6669	0.0427	0.0754
Ningxia	2019	0.0778	0.0049	0.0201	0.0338	0.0266	0.0226	0.7114	0.0617	0.041
Xinjiang	2019	0.0155	0.0001	0.004	0.0324	0.1252	0.0167	0.706	0.0496	0.0505
Beijing	2020	0.0133	0.0124	0.0006	0.0428	0.1306	0.0001	0.7885	0.0062	0.0054
Tianjin	2020	0.0289	0.0205	0.0036	0.0313	0.1734	0.0026	0.6357	0.0492	0.0548
Hebei	2020	0.0432	0.0103	0.0121	0.0385	0.1412	0.0086	0.632	0.0722	0.0419
Shanxi	2020	0.0488	0.0064	0.0131	0.0312	0.1415	0.0091	0.6463	0.0746	0.029
Inner Mongolia	2020	0.0777	0.0009	0.0144	0.0327	0.0569	0.0178	0.6922	0.0602	0.0471
Liaoning	2020	0.0324	0.0057	0.0077	0.0306	0.1418	0.0062	0.6767	0.0594	0.0395
Jilin	2020	0.0185	0.0015	0.0049	0.0308	0.1488	0.0031	0.6986	0.0479	0.0458
Heilongjiang	2020	0.0182	0.0008	0.0059	0.032	0.1533	0.0039	0.6886	0.0337	0.0637
Shanghai	2020	0.0215	0.0528	0.0016	0.0277	0.1884	0.0008	0.6166	0.0352	0.0554
Jiangsu	2020	0.0431	0.0216	0.0045	0.0403	0.1475	0.0036	0.6063	0.0929	0.0402
Zhejiang	2020	0.0224	0.0092	0.0028	0.037	0.166	0.0047	0.6359	0.0779	0.0443
Anhui	2020	0.0293	0.008	0.0062	0.0367	0.1424	0.0034	0.6698	0.0589	0.0453
Fujian	2020	0.0207	0.0056	0.0024	0.0358	0.1375	0.0027	0.6886	0.0774	0.0294
Jiangxi	2020	0.0178	0.0031	0.0043	0.0372	0.1447	0.0035	0.6915	0.0781	0.0198
Shandong	2020	0.0492	0.0196	0.0091	0.043	0.1077	0.0079	0.6305	0.0775	0.0555
Henan	2020	0.027	0.0101	0.0066	0.042	0.1708	0.0037	0.6129	0.0747	0.052
Hubei	2020	0.0277	0.0054	0.0048	0.0335	0.1473	0.0018	0.6756	0.0576	0.0462
Hunan	2020	0.0113	0.0027	0.0024	0.033	0.1722	0.0015	0.6785	0.0551	0.0434
Guangdong	2020	0.0193	0.0089	0.0027	0.0443	0.1001	0.004	0.6829	0.0943	0.0435
Guangxi	2020	0.0601	0.0031	0.0071	0.0354	0.1709	0.0061	0.6306	0.0394	0.0472
Hainan	2020	0.0001	0.0004	0.0001	0.0318	0.1743	0.0032	0.7438	0	0.0464
Chongqing	2020	0.0176	0.0044	0.0029	0.0364	0.1121	0.0017	0.7312	0.0552	0.0384
Sichuan	2020	0.0085	0.001	0.002	0.0394	0.1622	0.0032	0.6796	0.0586	0.0455
Guizhou	2020	0.0133	0.002	0.004	0.0339	0.0954	0.0056	0.7521	0.0461	0.0475
Yunnan	2020	0.0084	0.0007	0.0023	0.0323	0.1663	0.0048	0.7029	0.0348	0.0475
Shanxi	2020	0.0298	0.0037	0.006	0.0335	0.1598	0.0034	0.6528	0.0646	0.0464
Gansu	2020	0.025	0.0008	0.0097	0.0318	0.118	0.011	0.6964	0.0401	0.0672
Qinghai	2020	0.0135	0	0.0037	0.0287	0.1477	0.0181	0.6839	0.0404	0.0641
Ningxia	2020	0.0795	0.005	0.0197	0.0314	0.0278	0.021	0.7152	0.0617	0.0386
Xinjiang	2020	0.0165	0.0001	0.0041	0.0331	0.1411	0.0182	0.6945	0.0463	0.0462
Beijing	2021	0.0128	0.0119	0.0005	0.04	0.1206	0	0.7943	0.0149	0.005
Tianjin	2021	0.0295	0.0207	0.0033	0.0278	0.1765	0.0025	0.6345	0.0519	0.0533
Hebei	2021	0.0408	0.0097	0.0102	0.0366	0.1371	0.0079	0.6405	0.0773	0.0399
Shanxi	2021	0.0513	0.0067	0.0106	0.0299	0.1329	0.0072	0.6413	0.0924	0.0277
Inner Mongolia	2021	0.0845	0.001	0.0132	0.0316	0.044	0.0146	0.6822	0.0828	0.0461
Liaoning	2021	0.0345	0.006	0.0071	0.031	0.1409	0.0055	0.6731	0.0625	0.0394
Jilin	2021	0.0196	0.0015	0.0048	0.0313	0.1409	0.003	0.7027	0.05	0.0463
Heilongjiang	2021	0.0199	0.0008	0.0058	0.0319	0.1425	0.0039	0.6901	0.0406	0.0645
Shanghai	2021	0.0228	0.056	0.0015	0.0284	0.1905	0.0008	0.609	0.0351	0.0559
Jiangsu	2021	0.0422	0.0212	0.0038	0.038	0.1334	0.0033	0.6266	0.0938	0.0377
Zhejiang	2021	0.0228	0.0094	0.0024	0.0363	0.1753	0.0046	0.6244	0.0815	0.0433
Anhui	2021	0.0303	0.0082	0.0057	0.0362	0.1462	0.0034	0.6657	0.0601	0.0443
Fujian	2021	0.0213	0.0057	0.0022	0.0345	0.1307	0.0027	0.6949	0.0798	0.0282
Jiangxi	2021	0.0205	0.0035	0.0041	0.0388	0.1244	0.0036	0.6973	0.0871	0.0207
Shandong	2021	0.0495	0.0197	0.008	0.0421	0.1003	0.007	0.6393	0.0796	0.0545
Henan	2021	0.0297	0.011	0.0067	0.0435	0.1633	0.0039	0.612	0.0759	0.0539
Hubei	2021	0.0304	0.006	0.0046	0.0358	0.1426	0.0019	0.6632	0.0666	0.049
Hunan	2021	0.0128	0.003	0.0024	0.0345	0.1706	0.0016	0.6715	0.0587	0.0449
Guangdong	2021	0.0198	0.0091	0.0024	0.0422	0.1041	0.0039	0.6824	0.0943	0.0417
Guangxi	2021	0.0224	0.003	0.0063	0.0332	0.1453	0.0057	0.6954	0.0445	0.0443
Hainan	2021	0.0002	0.0004	0	0.0328	0.1572	0.003	0.7574	0.0017	0.0475
Chongqing	2021	0.0181	0.0045	0.0026	0.0364	0.1091	0.0018	0.7323	0.0567	0.0384
Sichuan	2021	0.0099	0.0012	0.002	0.0414	0.1823	0.0036	0.6468	0.0656	0.0474
Guizhou	2021	0.0137	0.002	0.0037	0.0341	0.1131	0.0057	0.7319	0.0479	0.0478
Yunnan	2021	0.0088	0.0007	0.0021	0.0331	0.1594	0.0046	0.7035	0.0393	0.0486
Shanxi	2021	0.0317	0.0039	0.0056	0.0326	0.1569	0.0041	0.6405	0.0787	0.0461
Gansu	2021	0.0264	0.0008	0.0089	0.0312	0.1205	0.0103	0.6891	0.0464	0.0663
Qinghai	2021	0.0144	0	0.0035	0.0293	0.1422	0.0188	0.6804	0.0475	0.0639
Ningxia	2021	0.083	0.0052	0.0179	0.0305	0.0348	0.0196	0.6973	0.0743	0.0373
Xinjiang	2021	0.017	0.0001	0.0037	0.0328	0.1181	0.0173	0.7056	0.0595	0.0458
Beijing	2022	0.0124	0.0115	0.0004	0.0397	0.1214	0	0.807	0.0075	0
Tianjin	2022	0.0295	0.0205	0.0031	0.0278	0.1745	0.0027	0.6381	0.0535	0.0502
Hebei	2022	0.0418	0.0099	0.0099	0.0387	0.1421	0.0086	0.6374	0.0747	0.0369
Shanxi	2022	0.0537	0.007	0.0097	0.0307	0.1359	0.007	0.6248	0.1031	0.028
Inner Mongolia	2022	0.0866	0.0011	0.0119	0.0313	0.0511	0.0138	0.6806	0.0847	0.0389
Liaoning	2022	0.0336	0.0058	0.0065	0.0302	0.1394	0.0053	0.6745	0.0622	0.0426
Jilin	2022	0.0201	0.0015	0.0049	0.0326	0.1313	0.0034	0.724	0.0461	0.036
Heilongjiang	2022	0.0199	0.0008	0.0053	0.0317	0.1358	0.004	0.6997	0.0438	0.0591
Shanghai	2022	0.0225	0.0549	0.0014	0.0284	0.1894	0.0007	0.6159	0.0339	0.053
Jiangsu	2022	0.0427	0.0215	0.0036	0.039	0.1298	0.0033	0.6298	0.0952	0.0352
Zhejiang	2022	0.0212	0.0089	0.0021	0.0347	0.1536	0.0044	0.6534	0.0793	0.0424
Anhui	2022	0.033	0.009	0.0059	0.0391	0.1115	0.004	0.7048	0.065	0.0278
Fujian	2022	0.0208	0.0056	0.0019	0.0338	0.1246	0.0024	0.712	0.0684	0.0305
Jiangxi	2022	0.0205	0.0035	0.0038	0.0374	0.1056	0.0033	0.731	0.0761	0.0188
Shandong	2022	0.0491	0.0196	0.0075	0.0427	0.0974	0.0068	0.655	0.0812	0.0407
Henan	2022	0.0265	0.0098	0.0057	0.0393	0.1392	0.0038	0.6569	0.0596	0.0592
Hubei	2022	0.0293	0.0058	0.0041	0.0358	0.1306	0.0019	0.692	0.0613	0.0392
Hunan	2022	0.0123	0.0028	0.0021	0.033	0.157	0.0014	0.7011	0.0512	0.039
Guangdong	2022	0.0177	0.0081	0.0021	0.0377	0.09	0.0033	0.7246	0.0854	0.0311
Guangxi	2022	0.0212	0.0029	0.0055	0.0312	0.1694	0.0048	0.6866	0.041	0.0374
Hainan	2022	0.0005	0.0004	0.0001	0.0335	0.1682	0.0028	0.7537	0.0028	0.038
Chongqing	2022	0.0185	0.0046	0.0025	0.0373	0.0946	0.0019	0.7555	0.0545	0.0306
Sichuan	2022	0.0101	0.0012	0.0019	0.0432	0.1867	0.0037	0.6423	0.0677	0.0431
Guizhou	2022	0.0137	0.002	0.0036	0.0342	0.1069	0.0055	0.7436	0.049	0.0415
Yunnan	2022	0.0087	0.0007	0.0019	0.0341	0.1478	0.0051	0.7254	0.0402	0.0361
Shanxi	2022	0.0319	0.004	0.005	0.0326	0.1538	0.0039	0.6475	0.0841	0.0371
Gansu	2022	0.027	0.0009	0.0083	0.032	0.1011	0.0095	0.7005	0.0519	0.0688
Qinghai	2022	0.0142	0	0.0031	0.029	0.1358	0.0189	0.6775	0.0604	0.061
Ningxia	2022	0.0858	0.0054	0.0165	0.031	0	0.0211	0.7215	0.0815	0.0372
Xinjiang	2022	0.0167	0.0001	0.0032	0.0324	0.1044	0.0159	0.7154	0.0688	0.043

## Sheet: 全国各指标平均障碍度时间变化
year	Z1_O	Z2_O	Z3_O	Z4_O	Z5_O	Z6_O	Z7_O	Z8_O	Z9_O
2008	0.01505	0.00445667	0.00986333	0.0286933	0.18728	0.00808333	0.611433	0.0721	0.0630667
2009	0.0167333	0.00498667	0.00944667	0.0298	0.180703	0.00750667	0.62613	0.0660833	0.05863
2010	0.01981	0.00586667	0.00904667	0.0325367	0.185133	0.00752333	0.605783	0.0751533	0.0591533
2011	0.0217633	0.00621667	0.00826667	0.03198	0.171947	0.00709	0.62399	0.0720333	0.0567233
2012	0.0233033	0.00660333	0.00783333	0.03312	0.17226	0.00688333	0.62134	0.0721967	0.05644
2013	0.02509	0.00718667	0.00773	0.03434	0.169913	0.00693	0.61951	0.0717633	0.0575533
2014	0.0256067	0.00749	0.00725333	0.03492	0.164677	0.00676	0.627287	0.0694667	0.0565333
2015	0.0251367	0.00736667	0.00684667	0.03362	0.16186	0.00644333	0.63742	0.06405	0.0572333
2016	0.0254667	0.00737333	0.00661333	0.0357633	0.159923	0.00634333	0.640547	0.0617233	0.05623
2017	0.0265233	0.00769667	0.00642	0.0365067	0.156463	0.00644667	0.642467	0.0633633	0.05413
2018	0.0251	0.00722667	0.00566333	0.0338567	0.14542	0.00597333	0.673533	0.0572833	0.04594
2019	0.0257633	0.00742333	0.00573667	0.03381	0.142323	0.00605	0.674077	0.0577567	0.0470533
2020	0.0280867	0.00755667	0.00571	0.0349367	0.13959	0.00617667	0.67769	0.0556733	0.0445733
2021	0.02802	0.00776333	0.00518667	0.0345933	0.13519	0.00586	0.677507	0.0615667	0.0443233
2022	0.02805	0.00766	0.00478333	0.03447	0.12763	0.00577333	0.69107	0.0611367	0.0394133

## Sheet: Sheet1
year	Z1_O	Z2_O	Z3_O	Z4_O	Z5_O	Z6_O	Z7_O	Z8_O	Z9_O
2008	0.0151	0.0045	0.0099	0.0287	0.1873	0.0081	0.6112	0.0721	0.0631
2009	0.0167	0.005	0.0094	0.0298	0.1808	0.0075	0.6261	0.0661	0.0586
2010	0.0198	0.0059	0.009	0.0325	0.1851	0.0075	0.6058	0.0752	0.0592
2011	0.0218	0.0062	0.0083	0.032	0.1719	0.0071	0.624	0.072	0.0567
2012	0.0233	0.0066	0.0078	0.0331	0.1724	0.0069	0.6213	0.0722	0.0564
2013	0.0251	0.0072	0.0077	0.0343	0.1699	0.0069	0.6195	0.0718	0.0576
2014	0.0256	0.0075	0.0073	0.0349	0.1647	0.0068	0.6272	0.0695	0.0565
2015	0.0251	0.0074	0.0068	0.0336	0.162	0.0064	0.6374	0.0641	0.0572
2016	0.0255	0.0074	0.0066	0.0358	0.1599	0.0063	0.6405	0.0618	0.0562
2017	0.0265	0.0077	0.0064	0.0365	0.1565	0.0064	0.6425	0.0634	0.0541
2018	0.0251	0.0072	0.0057	0.0339	0.1454	0.006	0.6735	0.0573	0.0459
2019	0.0258	0.0074	0.0057	0.0338	0.1423	0.0061	0.674	0.0578	0.0471
2020	0.0281	0.0076	0.0057	0.0349	0.1396	0.0062	0.6776	0.0557	0.0446
2021	0.028	0.0078	0.0052	0.0346	0.1352	0.0059	0.6774	0.0616	0.0443
2022	0.0281	0.0077	0.0048	0.0345	0.1276	0.0058	0.691	0.0611	0.0394
