# Supplementary material for: Water-energy-carbon coupling relationships and barrier analysis: an empirical study based on China
Source: Frontiers journal article supplement (doi:10.3389/feart.2025.1570713), 2025-06-18
Supplement: Table_2.xlsx [file Table_2.xlsx]

## Sheet: WEC
Province	year	water-综合发展指数	energy-综合发展指数	carbon-综合发展指数	WEC-T	WEC-C	WEC-D
Beijing	2008	0.2186	0.1329	0.3239	0.2251	0.937754	0.459444
Tianjin	2008	0.126	0.2034	0.232	0.1871	0.968097	0.425595
Hebei	2008	0.1937	0.1179	0.3018	0.2045	0.930747	0.436277
Shanxi	2008	0.1698	0.3524	0.1967	0.2396	0.949246	0.476906
Inner Mongolia	2008	0.166	0.3082	0.2711	0.2484	0.96712	0.490135
Liaoning	2008	0.1876	0.1269	0.2859	0.2001	0.946928	0.435293
Jilin	2008	0.1758	0.1619	0.2741	0.2039	0.972531	0.445308
Heilongjiang	2008	0.2152	0.2038	0.2479	0.2223	0.996556	0.470674
Shanghai	2008	0.181	0.1452	0.2475	0.1912	0.976135	0.432015
Jiangsu	2008	0.2475	0.1613	0.3972	0.2687	0.935102	0.50126
Zhejiang	2008	0.3182	0.1561	0.4045	0.2929	0.928051	0.521369
Anhui	2008	0.2299	0.1505	0.2796	0.22	0.968534	0.461603
Fujian	2008	0.3533	0.1808	0.2769	0.2703	0.963804	0.510408
Jiangxi	2008	0.3246	0.1139	0.2716	0.2367	0.911456	0.46448
Shandong	2008	0.1984	0.1882	0.4254	0.2707	0.92872	0.501403
Henan	2008	0.1988	0.1592	0.2388	0.1989	0.986485	0.442958
Hubei	2008	0.2513	0.2111	0.268	0.2435	0.995021	0.492227
Hunan	2008	0.3136	0.1668	0.2599	0.2468	0.967178	0.488569
Guangdong	2008	0.4063	0.1973	0.3138	0.3058	0.95816	0.5413
Guangxi	2008	0.3685	0.1663	0.2639	0.2662	0.949862	0.502845
Hainan	2008	0.339	0.1684	0.3043	0.2706	0.957209	0.508941
Chongqing	2008	0.2357	0.1739	0.2556	0.2217	0.98683	0.467739
Sichuan	2008	0.2639	0.2418	0.2687	0.2581	0.99895	0.507769
Guizhou	2008	0.2434	0.2148	0.1898	0.216	0.994863	0.463563
Yunnan	2008	0.3259	0.2151	0.2278	0.2563	0.982654	0.501851
Shanxi	2008	0.1731	0.2566	0.2458	0.2252	0.985238	0.471037
Gansu	2008	0.1275	0.2097	0.1877	0.175	0.978518	0.413812
Qinghai	2008	0.2354	0.224	0.2165	0.2253	0.999408	0.474517
Ningxia	2008	0.2462	0.2567	0.1829	0.2286	0.989084	0.475504
Xinjiang	2008	0.2399	0.236	0.2091	0.2283	0.998151	0.477365
Beijing	2009	0.227	0.1288	0.4163	0.2574	0.89378	0.479645
Tianjin	2009	0.1245	0.1948	0.2392	0.1862	0.965172	0.423928
Hebei	2009	0.1972	0.1012	0.3371	0.2118	0.891157	0.43445
Shanxi	2009	0.1726	0.3081	0.2246	0.2351	0.972288	0.478105
Inner Mongolia	2009	0.1669	0.3225	0.2976	0.2623	0.960918	0.502045
Liaoning	2009	0.1904	0.1227	0.3107	0.2079	0.931165	0.439988
Jilin	2009	0.1795	0.1435	0.2844	0.2025	0.959243	0.440734
Heilongjiang	2009	0.2363	0.1892	0.2771	0.2342	0.987992	0.481028
Shanghai	2009	0.1962	0.1578	0.2558	0.2033	0.980624	0.446499
Jiangsu	2009	0.2506	0.1512	0.3909	0.2642	0.92942	0.495533
Zhejiang	2009	0.3322	0.1599	0.3095	0.2672	0.951626	0.504256
Anhui	2009	0.2376	0.1382	0.2924	0.2227	0.954242	0.460988
Fujian	2009	0.3227	0.156	0.2829	0.2539	0.954802	0.492366
Jiangxi	2009	0.3177	0.0974	0.305	0.24	0.880414	0.459673
Shandong	2009	0.2016	0.1647	0.45	0.2721	0.905184	0.496287
Henan	2009	0.2073	0.1419	0.2513	0.2002	0.973194	0.4414
Hubei	2009	0.2461	0.2096	0.2882	0.248	0.991606	0.495901
Hunan	2009	0.3071	0.1507	0.2903	0.2494	0.953326	0.487606
Guangdong	2009	0.3642	0.2069	0.3545	0.3085	0.96888	0.546717
Guangxi	2009	0.3212	0.1668	0.2901	0.2594	0.962186	0.499591
Hainan	2009	0.3705	0.1567	0.3216	0.2829	0.937649	0.515035
Chongqing	2009	0.2364	0.1671	0.3061	0.2365	0.970369	0.479053
Sichuan	2009	0.2681	0.2258	0.2805	0.2581	0.995727	0.506949
Guizhou	2009	0.2331	0.1937	0.1871	0.2046	0.995265	0.451255
Yunnan	2009	0.2917	0.2	0.2708	0.2542	0.987233	0.500954
Shanxi	2009	0.1953	0.2772	0.2765	0.2497	0.987119	0.496471
Gansu	2009	0.1354	0.2307	0.2003	0.1888	0.975994	0.429264
Qinghai	2009	0.3049	0.2609	0.2195	0.2618	0.991078	0.509376
Ningxia	2009	0.2511	0.2696	0.2707	0.2638	0.99941	0.513463
Xinjiang	2009	0.2382	0.2461	0.2628	0.249	0.999161	0.49879
Beijing	2010	0.2343	0.119	0.4108	0.2547	0.885022	0.474779
Tianjin	2010	0.1388	0.1915	0.2495	0.1933	0.972119	0.433487
Hebei	2010	0.2005	0.0958	0.4197	0.2387	0.840133	0.447817
Shanxi	2010	0.1708	0.2082	0.2559	0.2116	0.986497	0.456884
Inner Mongolia	2010	0.172	0.1783	0.3353	0.2285	0.951528	0.466288
Liaoning	2010	0.2229	0.1173	0.3247	0.2216	0.920439	0.45163
Jilin	2010	0.2208	0.1443	0.3128	0.226	0.952357	0.463932
Heilongjiang	2010	0.2296	0.1924	0.3032	0.2417	0.982424	0.48729
Shanghai	2010	0.1915	0.1447	0.2282	0.1881	0.982921	0.429985
Jiangsu	2010	0.2498	0.1431	0.4261	0.273	0.907999	0.497879
Zhejiang	2010	0.3895	0.1597	0.3613	0.3035	0.929825	0.531227
Anhui	2010	0.2606	0.1065	0.3101	0.2257	0.907847	0.45266
Fujian	2010	0.431	0.1701	0.3034	0.3015	0.932778	0.530314
Jiangxi	2010	0.422	0.1003	0.3526	0.2916	0.844231	0.496163
Shandong	2010	0.2023	0.1521	0.4699	0.2748	0.886638	0.493607
Henan	2010	0.2061	0.1117	0.257	0.1916	0.943972	0.425282
Hubei	2010	0.281	0.198	0.2836	0.2542	0.986697	0.500818
Hunan	2010	0.3613	0.1474	0.2793	0.2627	0.936283	0.495945
Guangdong	2010	0.4106	0.1992	0.7726	0.4608	0.864388	0.631118
Guangxi	2010	0.3718	0.1554	0.3062	0.2778	0.937971	0.510459
Hainan	2010	0.3674	0.1449	0.3396	0.284	0.924253	0.512336
Chongqing	2010	0.2453	0.1537	0.3577	0.2522	0.943686	0.48785
Sichuan	2010	0.2803	0.2358	0.2859	0.2673	0.996339	0.516063
Guizhou	2010	0.2604	0.1486	0.2124	0.2071	0.97429	0.449194
Yunnan	2010	0.3151	0.1851	0.2837	0.2613	0.975211	0.5048
Shanxi	2010	0.2021	0.2165	0.3072	0.2419	0.982772	0.487578
Gansu	2010	0.1385	0.224	0.2023	0.1883	0.979771	0.429524
Qinghai	2010	0.2651	0.2338	0.2271	0.242	0.997719	0.491374
Ningxia	2010	0.2511	0.193	0.2772	0.2404	0.988715	0.487532
Xinjiang	2010	0.2587	0.2176	0.2594	0.2452	0.996695	0.494358
Beijing	2011	0.2349	0.1192	0.4036	0.2526	0.888507	0.473748
Tianjin	2011	0.1301	0.1799	0.3019	0.204	0.940801	0.438091
Hebei	2011	0.1996	0.105	0.5048	0.2698	0.813669	0.468538
Shanxi	2011	0.1756	0.1991	0.2747	0.2165	0.98196	0.46108
Inner Mongolia	2011	0.1676	0.1756	0.4135	0.2522	0.911917	0.479568
Liaoning	2011	0.1987	0.115	0.3902	0.2346	0.883767	0.455337
Jilin	2011	0.1875	0.1266	0.3089	0.2077	0.935515	0.440802
Heilongjiang	2011	0.226	0.1823	0.3193	0.2425	0.97333	0.485832
Shanghai	2011	0.1726	0.1404	0.2321	0.1817	0.978752	0.42171
Jiangsu	2011	0.2588	0.157	0.4652	0.2937	0.907082	0.516149
Zhejiang	2011	0.3039	0.168	0.3361	0.2693	0.957663	0.507837
Anhui	2011	0.2349	0.1082	0.353	0.232	0.895525	0.455809
Fujian	2011	0.3204	0.146	0.3343	0.2669	0.93694	0.500069
Jiangxi	2011	0.3131	0.0948	0.3853	0.2644	0.852122	0.474659
Shandong	2011	0.2068	0.1669	0.5179	0.2972	0.879769	0.511339
Henan	2011	0.2091	0.1193	0.2703	0.1996	0.946656	0.434687
Hubei	2011	0.2492	0.1686	0.3278	0.2485	0.964466	0.489561
Hunan	2011	0.2891	0.1325	0.2832	0.2349	0.942268	0.470467
Guangdong	2011	0.3553	0.2039	0.4067	0.322	0.959293	0.555781
Guangxi	2011	0.3121	0.1486	0.3255	0.2621	0.943067	0.49717
Hainan	2011	0.388	0.1337	0.3509	0.2909	0.904388	0.51292
Chongqing	2011	0.2476	0.1523	0.4329	0.2776	0.913818	0.503663
Sichuan	2011	0.2683	0.2492	0.3108	0.2761	0.99575	0.524334
Guizhou	2011	0.2213	0.1365	0.2349	0.1976	0.97264	0.438399
Yunnan	2011	0.2871	0.189	0.3069	0.261	0.978416	0.505338
Shanxi	2011	0.2171	0.2092	0.303	0.2431	0.985757	0.489528
Gansu	2011	0.1384	0.19	0.2104	0.1796	0.984779	0.420555
Qinghai	2011	0.2666	0.2639	0.2468	0.2591	0.999419	0.508871
Ningxia	2011	0.2511	0.2024	0.2716	0.2417	0.992474	0.489776
Xinjiang	2011	0.2448	0.2113	0.2841	0.2467	0.992734	0.494881
Beijing	2012	0.2351	0.1319	0.4563	0.2744	0.881345	0.491773
Tianjin	2012	0.1429	0.1683	0.3022	0.2045	0.947359	0.440153
Hebei	2012	0.2	0.1046	0.4525	0.2524	0.838227	0.459966
Shanxi	2012	0.1748	0.2024	0.3147	0.2306	0.968191	0.472509
Inner Mongolia	2012	0.1739	0.141	0.4474	0.2541	0.874447	0.471378
Liaoning	2012	0.221	0.1273	0.5047	0.2843	0.851642	0.492059
Jilin	2012	0.2045	0.125	0.3134	0.2143	0.93371	0.447319
Heilongjiang	2012	0.242	0.1683	0.3477	0.2527	0.957532	0.491903
Shanghai	2012	0.2042	0.1497	0.232	0.1953	0.983753	0.438323
Jiangsu	2012	0.2484	0.1733	0.4982	0.3066	0.906077	0.52707
Zhejiang	2012	0.3962	0.1775	0.3986	0.3241	0.937284	0.551157
Anhui	2012	0.2416	0.1197	0.3724	0.2446	0.902962	0.469962
Fujian	2012	0.4236	0.178	0.3497	0.3171	0.93863	0.545563
Jiangxi	2012	0.418	0.0972	0.4173	0.3108	0.826487	0.506826
Shandong	2012	0.1973	0.1694	0.5692	0.312	0.855711	0.516703
Henan	2012	0.1975	0.1252	0.2937	0.2055	0.942505	0.440096
Hubei	2012	0.256	0.1772	0.3417	0.2583	0.965291	0.499334
Hunan	2012	0.3641	0.1481	0.307	0.2731	0.933332	0.504869
Guangdong	2012	0.4084	0.2108	0.3993	0.3395	0.957735	0.57022
Guangxi	2012	0.3916	0.1542	0.3431	0.2963	0.926939	0.524072
Hainan	2012	0.337	0.1373	0.3507	0.275	0.920618	0.50316
Chongqing	2012	0.247	0.1735	0.4191	0.2799	0.935736	0.511774
Sichuan	2012	0.2969	0.2424	0.3286	0.2893	0.992175	0.535758
Guizhou	2012	0.2601	0.1337	0.2616	0.2185	0.955545	0.456932
Yunnan	2012	0.2957	0.2016	0.3155	0.2709	0.981563	0.51566
Shanxi	2012	0.1987	0.208	0.3195	0.2421	0.976433	0.486204
Gansu	2012	0.1382	0.188	0.2504	0.1922	0.971285	0.432066
Qinghai	2012	0.2977	0.2806	0.2546	0.2776	0.997938	0.526334
Ningxia	2012	0.2196	0.1754	0.2787	0.2246	0.982323	0.469712
Xinjiang	2012	0.2614	0.2321	0.3329	0.2755	0.988619	0.521886
Beijing	2013	0.2365	0.1428	0.5004	0.2932	0.875143	0.506549
Tianjin	2013	0.1282	0.1688	0.3199	0.2056	0.926826	0.436526
Hebei	2013	0.2007	0.1314	0.4564	0.2628	0.871931	0.478689
Shanxi	2013	0.1782	0.2093	0.3309	0.2395	0.965042	0.480757
Inner Mongolia	2013	0.1814	0.1932	0.4792	0.2846	0.899813	0.50605
Liaoning	2013	0.2162	0.149	0.3928	0.2527	0.922267	0.48276
Jilin	2013	0.2186	0.1467	0.3151	0.2268	0.953235	0.464966
Heilongjiang	2013	0.2748	0.1694	0.3805	0.2749	0.948244	0.510561
Shanghai	2013	0.1758	0.1489	0.2547	0.1931	0.974519	0.433797
Jiangsu	2013	0.2509	0.1955	0.5816	0.3427	0.8917	0.552798
Zhejiang	2013	0.3338	0.2019	0.4063	0.314	0.959902	0.549007
Anhui	2013	0.2374	0.1437	0.4412	0.2741	0.900773	0.496892
Fujian	2013	0.384	0.1959	0.3785	0.3195	0.955839	0.552622
Jiangxi	2013	0.346	0.1103	0.3882	0.2815	0.872484	0.495585
Shandong	2013	0.1962	0.1902	0.6139	0.3334	0.851779	0.532901
Henan	2013	0.2043	0.152	0.3303	0.2289	0.949346	0.46616
Hubei	2013	0.2683	0.1815	0.3355	0.2618	0.969354	0.503763
Hunan	2013	0.3329	0.147	0.3273	0.2691	0.936841	0.502099
Guangdong	2013	0.4223	0.2169	0.4354	0.3582	0.953815	0.584514
Guangxi	2013	0.3909	0.1521	0.3582	0.3004	0.922728	0.526486
Hainan	2013	0.3967	0.1363	0.3571	0.2967	0.904201	0.517954
Chongqing	2013	0.2498	0.1676	0.4085	0.2753	0.935865	0.507586
Sichuan	2013	0.2832	0.2475	0.352	0.2942	0.989415	0.539524
Guizhou	2013	0.2521	0.1286	0.3024	0.2277	0.939944	0.462629
Yunnan	2013	0.2969	0.2118	0.3366	0.2818	0.981734	0.525978
Shanxi	2013	0.2017	0.2332	0.335	0.2566	0.976892	0.50067
Gansu	2013	0.1405	0.2037	0.3011	0.2151	0.95313	0.45279
Qinghai	2013	0.2386	0.2824	0.2541	0.2584	0.99757	0.507713
Ningxia	2013	0.2203	0.1827	0.3059	0.2363	0.977193	0.480532
Xinjiang	2013	0.2621	0.2713	0.3605	0.298	0.989554	0.543035
Beijing	2014	0.2344	0.1592	0.6014	0.3317	0.850458	0.531128
Tianjin	2014	0.1214	0.1741	0.3393	0.2116	0.911349	0.439137
Hebei	2014	0.1964	0.1697	0.4515	0.2725	0.905887	0.496844
Shanxi	2014	0.1847	0.3512	0.3248	0.2869	0.96268	0.525541
Inner Mongolia	2014	0.17	0.4429	0.5307	0.3812	0.89684	0.584701
Liaoning	2014	0.1968	0.165	0.3758	0.2459	0.936388	0.479852
Jilin	2014	0.1916	0.1501	0.3295	0.2237	0.94583	0.459981
Heilongjiang	2014	0.2503	0.1812	0.3473	0.2596	0.965613	0.500673
Shanghai	2014	0.2165	0.1582	0.2808	0.2185	0.973275	0.461151
Jiangsu	2014	0.271	0.1906	0.5896	0.3504	0.891222	0.558824
Zhejiang	2014	0.3674	0.2172	0.4417	0.3421	0.95842	0.572604
Anhui	2014	0.256	0.145	0.4285	0.2765	0.909546	0.501487
Fujian	2014	0.3863	0.2069	0.3496	0.3143	0.965578	0.550891
Jiangxi	2014	0.3728	0.1156	0.3869	0.2918	0.875606	0.505472
Shandong	2014	0.1967	0.2586	0.6126	0.356	0.884017	0.56099
Henan	2014	0.2017	0.1673	0.342	0.237	0.953515	0.475377
Hubei	2014	0.285	0.1897	0.3611	0.2786	0.966493	0.518907
Hunan	2014	0.3615	0.1547	0.335	0.2837	0.936061	0.515326
Guangdong	2014	0.3764	0.224	0.4225	0.341	0.965005	0.573643
Guangxi	2014	0.3798	0.163	0.3551	0.2993	0.935961	0.529276
Hainan	2014	0.3477	0.1383	0.3587	0.2816	0.917638	0.508337
Chongqing	2014	0.2895	0.1849	0.392	0.2888	0.955051	0.525185
Sichuan	2014	0.287	0.2748	0.3721	0.3113	0.990848	0.555384
Guizhou	2014	0.2955	0.1872	0.3361	0.2729	0.970631	0.51467
Yunnan	2014	0.2964	0.2235	0.3298	0.2832	0.987017	0.528699
Shanxi	2014	0.2042	0.3294	0.3691	0.3009	0.96951	0.540116
Gansu	2014	0.1403	0.1998	0.3001	0.2134	0.953042	0.450976
Qinghai	2014	0.2741	0.2817	0.2689	0.2749	0.999818	0.524261
Ningxia	2014	0.2343	0.2726	0.3161	0.2743	0.992573	0.521788
Xinjiang	2014	0.2473	0.3178	0.3937	0.3196	0.982293	0.560304
Beijing	2015	0.2443	0.1668	0.5346	0.3152	0.885967	0.528447
Tianjin	2015	0.129	0.1878	0.3014	0.2061	0.94146	0.440494
Hebei	2015	0.2026	0.1568	0.4307	0.2634	0.908154	0.489089
Shanxi	2015	0.1841	0.3487	0.3546	0.2958	0.958113	0.532362
Inner Mongolia	2015	0.1698	0.3776	0.5245	0.3573	0.903383	0.568136
Liaoning	2015	0.1989	0.14	0.3907	0.2432	0.911112	0.470725
Jilin	2015	0.1977	0.1395	0.3438	0.227	0.932402	0.46006
Heilongjiang	2015	0.2461	0.1687	0.3483	0.2544	0.957782	0.493619
Shanghai	2015	0.247	0.1605	0.2768	0.2281	0.974213	0.4714
Jiangsu	2015	0.2871	0.217	0.62	0.3747	0.902148	0.581408
Zhejiang	2015	0.405	0.2156	0.4337	0.3514	0.955553	0.579466
Anhui	2015	0.2705	0.1479	0.4399	0.2861	0.90917	0.510013
Fujian	2015	0.4139	0.2073	0.3696	0.3303	0.958394	0.562635
Jiangxi	2015	0.4141	0.1206	0.3889	0.3079	0.873107	0.518488
Shandong	2015	0.198	0.2194	0.5686	0.3287	0.886096	0.539685
Henan	2015	0.2072	0.1541	0.3447	0.2353	0.945209	0.471601
Hubei	2015	0.2942	0.176	0.3378	0.2693	0.963788	0.509459
Hunan	2015	0.3712	0.1616	0.4534	0.3287	0.914815	0.548361
Guangdong	2015	0.4018	0.2269	0.4319	0.3535	0.962304	0.583245
Guangxi	2015	0.4204	0.1785	0.3776	0.3255	0.936613	0.552148
Hainan	2015	0.2703	0.1381	0.3475	0.252	0.932513	0.484761
Chongqing	2015	0.2588	0.188	0.385	0.2773	0.957848	0.515375
Sichuan	2015	0.2838	0.2799	0.3621	0.3086	0.992854	0.553529
Guizhou	2015	0.2956	0.1828	0.3383	0.2722	0.967653	0.51322
Yunnan	2015	0.3082	0.2332	0.3243	0.2886	0.989897	0.534494
Shanxi	2015	0.2021	0.3253	0.3611	0.2962	0.970413	0.536131
Gansu	2015	0.1419	0.178	0.2935	0.2045	0.953632	0.441608
Qinghai	2015	0.227	0.2857	0.2624	0.2584	0.995551	0.507199
Ningxia	2015	0.2443	0.2631	0.328	0.2785	0.992048	0.525629
Xinjiang	2015	0.2572	0.3057	0.3692	0.3107	0.989164	0.554376
Beijing	2016	0.2477	0.1742	0.6284	0.3501	0.858113	0.548111
Tianjin	2016	0.136	0.1746	0.2883	0.1996	0.951137	0.435714
Hebei	2016	0.1973	0.1384	0.4325	0.2561	0.889331	0.47724
Shanxi	2016	0.1833	0.2988	0.4346	0.3056	0.941394	0.536368
Inner Mongolia	2016	0.1778	0.3678	0.5006	0.3487	0.917314	0.565568
Liaoning	2016	0.2111	0.151	0.323	0.2284	0.952628	0.466455
Jilin	2016	0.216	0.1318	0.3382	0.2287	0.930346	0.46127
Heilongjiang	2016	0.2507	0.1426	0.3546	0.2493	0.935295	0.482876
Shanghai	2016	0.2466	0.1872	0.2836	0.2391	0.985587	0.485442
Jiangsu	2016	0.3103	0.2248	0.5622	0.3658	0.928864	0.582905
Zhejiang	2016	0.3915	0.2177	0.5123	0.3738	0.941948	0.59338
Anhui	2016	0.3018	0.1638	0.4716	0.3124	0.914446	0.534484
Fujian	2016	0.5083	0.2066	0.3615	0.3588	0.9367	0.579731
Jiangxi	2016	0.4295	0.1104	0.4205	0.3201	0.847036	0.520707
Shandong	2016	0.2046	0.2572	0.6076	0.3565	0.890388	0.563403
Henan	2016	0.2139	0.1785	0.379	0.2571	0.9477	0.493613
Hubei	2016	0.3254	0.1966	0.4168	0.3129	0.95468	0.546552
Hunan	2016	0.39	0.1519	0.3505	0.2975	0.923986	0.524295
Guangdong	2016	0.4445	0.2205	0.471	0.3787	0.947349	0.598967
Guangxi	2016	0.4004	0.163	0.3615	0.3083	0.9303	0.535548
Hainan	2016	0.399	0.1539	0.352	0.3016	0.923504	0.527758
Chongqing	2016	0.2814	0.1715	0.3917	0.2815	0.946203	0.516097
Sichuan	2016	0.2874	0.281	0.4026	0.3237	0.986108	0.564981
Guizhou	2016	0.2856	0.1619	0.3558	0.2678	0.949833	0.504346
Yunnan	2016	0.3199	0.2049	0.3401	0.2883	0.976209	0.53051
Shanxi	2016	0.1993	0.3037	0.3878	0.2969	0.96426	0.53506
Gansu	2016	0.1456	0.1692	0.3189	0.2112	0.941116	0.445829
Qinghai	2016	0.2382	0.2539	0.2747	0.2556	0.998298	0.505139
Ningxia	2016	0.2166	0.2371	0.3464	0.2667	0.978813	0.51093
Xinjiang	2016	0.2632	0.2667	0.3951	0.3083	0.981714	0.550148
Beijing	2017	0.2422	0.191	0.6274	0.3535	0.869268	0.554334
Tianjin	2017	0.1343	0.1769	0.3281	0.2131	0.930436	0.445282
Hebei	2017	0.2045	0.1527	0.5116	0.2896	0.869673	0.501854
Shanxi	2017	0.1828	0.3352	0.3453	0.2878	0.961137	0.525942
Inner Mongolia	2017	0.1763	0.3778	0.4728	0.3423	0.922551	0.561951
Liaoning	2017	0.1978	0.1636	0.358	0.2398	0.943586	0.475681
Jilin	2017	0.2	0.1264	0.322	0.2161	0.930728	0.448475
Heilongjiang	2017	0.2432	0.1381	0.3407	0.2407	0.936326	0.474735
Shanghai	2017	0.1953	0.1832	0.2715	0.2167	0.984783	0.461955
Jiangsu	2017	0.27	0.2269	0.5461	0.3477	0.926817	0.567674
Zhejiang	2017	0.3395	0.2034	0.445	0.3293	0.951171	0.559661
Anhui	2017	0.2629	0.1592	0.4799	0.3007	0.904086	0.521401
Fujian	2017	0.3686	0.1898	0.3866	0.315	0.952929	0.54788
Jiangxi	2017	0.37	0.1086	0.43	0.3029	0.853588	0.50848
Shandong	2017	0.1966	0.2598	0.6663	0.3742	0.865941	0.569241
Henan	2017	0.2159	0.1738	0.4947	0.2948	0.898161	0.514566
Hubei	2017	0.3107	0.1854	0.4098	0.302	0.949982	0.535625
Hunan	2017	0.3631	0.146	0.3566	0.2886	0.923154	0.516161
Guangdong	2017	0.3829	0.2385	0.4802	0.3672	0.960349	0.593835
Guangxi	2017	0.4074	0.1563	0.3625	0.3087	0.922244	0.53357
Hainan	2017	0.349	0.1587	0.3614	0.2897	0.937235	0.521073
Chongqing	2017	0.2853	0.1736	0.4214	0.2934	0.938295	0.524686
Sichuan	2017	0.2908	0.2831	0.413	0.329	0.984788	0.569206
Guizhou	2017	0.2828	0.1581	0.3962	0.279	0.934227	0.510538
Yunnan	2017	0.3302	0.1933	0.3465	0.29	0.96792	0.529808
Shanxi	2017	0.2121	0.3034	0.3895	0.3017	0.970124	0.541005
Gansu	2017	0.1449	0.172	0.324	0.2136	0.939099	0.447875
Qinghai	2017	0.2777	0.2336	0.274	0.2618	0.996978	0.51089
Ningxia	2017	0.2095	0.2122	0.3354	0.2524	0.975286	0.496147
Xinjiang	2017	0.2564	0.2494	0.4329	0.3129	0.966782	0.550005
Beijing	2018	0.2652	0.1837	0.5874	0.3454	0.885472	0.55303
Tianjin	2018	0.1541	0.1902	0.2666	0.2036	0.974486	0.445427
Hebei	2018	0.2064	0.1725	0.3873	0.2554	0.938918	0.489694
Shanxi	2018	0.1858	0.353	0.3126	0.2838	0.9644	0.52316
Inner Mongolia	2018	0.1821	0.398	0.362	0.314	0.946219	0.54508
Liaoning	2018	0.1972	0.1685	0.3117	0.2258	0.965363	0.466882
Jilin	2018	0.2119	0.1295	0.3408	0.2274	0.926495	0.459004
Heilongjiang	2018	0.2583	0.1427	0.3281	0.243	0.944465	0.479067
Shanghai	2018	0.2057	0.1861	0.2738	0.2219	0.986384	0.467845
Jiangsu	2018	0.2742	0.2432	0.4498	0.3224	0.963729	0.55741
Zhejiang	2018	0.3343	0.2164	0.4026	0.3178	0.968235	0.554712
Anhui	2018	0.2634	0.161	0.4274	0.2839	0.925143	0.512492
Fujian	2018	0.3392	0.1845	0.3918	0.3052	0.951996	0.539026
Jiangxi	2018	0.3319	0.1104	0.4325	0.2916	0.86139	0.50118
Shandong	2018	0.2037	0.2685	0.5187	0.3303	0.923369	0.552258
Henan	2018	0.219	0.1814	0.4334	0.2779	0.929072	0.508123
Hubei	2018	0.2871	0.1893	0.3533	0.2766	0.968224	0.517504
Hunan	2018	0.3305	0.1448	0.3319	0.2691	0.934234	0.501401
Guangdong	2018	0.397	0.2415	0.4244	0.3543	0.970785	0.586472
Guangxi	2018	0.3776	0.1525	0.3505	0.2935	0.927554	0.521763
Hainan	2018	0.3777	0.1691	0.3387	0.2952	0.943991	0.527888
Chongqing	2018	0.2772	0.1687	0.4068	0.2842	0.939193	0.516642
Sichuan	2018	0.3135	0.2904	0.428	0.344	0.98562	0.582283
Guizhou	2018	0.2885	0.1622	0.3609	0.2705	0.948361	0.50649
Yunnan	2018	0.3391	0.2004	0.3404	0.2933	0.971463	0.533788
Shanxi	2018	0.2084	0.312	0.3171	0.2792	0.982244	0.523682
Gansu	2018	0.1487	0.1713	0.316	0.212	0.945328	0.447671
Qinghai	2018	0.3187	0.2558	0.2722	0.2822	0.99567	0.530074
Ningxia	2018	0.1714	0.2014	0.3304	0.2344	0.960312	0.474444
Xinjiang	2018	0.2491	0.2716	0.3456	0.2888	0.990251	0.534775
Beijing	2019	0.2706	0.1659	0.5975	0.3447	0.868503	0.54715
Tianjin	2019	0.1456	0.1961	0.2574	0.1997	0.973579	0.440935
Hebei	2019	0.2098	0.1826	0.4048	0.2657	0.938432	0.499341
Shanxi	2019	0.1848	0.3596	0.3288	0.2911	0.960488	0.52877
Inner Mongolia	2019	0.1772	0.4102	0.3474	0.3116	0.941526	0.541645
Liaoning	2019	0.2064	0.1766	0.2944	0.2258	0.976837	0.469649
Jilin	2019	0.2137	0.1295	0.3154	0.2195	0.937875	0.453722
Heilongjiang	2019	0.2762	0.1361	0.3069	0.2397	0.942536	0.475317
Shanghai	2019	0.2266	0.173	0.2705	0.2234	0.983572	0.468754
Jiangsu	2019	0.2559	0.2596	0.4416	0.319	0.966715	0.555322
Zhejiang	2019	0.3867	0.2235	0.3998	0.3367	0.967456	0.570739
Anhui	2019	0.2289	0.1571	0.4384	0.2748	0.912461	0.500744
Fujian	2019	0.4058	0.1874	0.3923	0.3285	0.944129	0.556908
Jiangxi	2019	0.407	0.1235	0.4498	0.3268	0.865345	0.531784
Shandong	2019	0.1969	0.2674	0.4811	0.3151	0.931937	0.541898
Henan	2019	0.2112	0.1741	0.4692	0.2848	0.907179	0.508296
Hubei	2019	0.2687	0.183	0.3814	0.2777	0.956733	0.515446
Hunan	2019	0.377	0.1434	0.3382	0.2862	0.920489	0.513268
Guangdong	2019	0.4097	0.2404	0.4663	0.3721	0.962329	0.5984
Guangxi	2019	0.4	0.1475	0.3568	0.3014	0.916012	0.525439
Hainan	2019	0.2997	0.1829	0.3421	0.2749	0.966443	0.515437
Chongqing	2019	0.2717	0.1683	0.4093	0.2831	0.937847	0.515271
Sichuan	2019	0.3058	0.2975	0.4479	0.3504	0.982059	0.586612
Guizhou	2019	0.301	0.1671	0.3738	0.2806	0.94752	0.51563
Yunnan	2019	0.2962	0.2142	0.354	0.2881	0.97921	0.531141
Shanxi	2019	0.2155	0.3243	0.2745	0.2714	0.986239	0.517364
Gansu	2019	0.1458	0.1912	0.3242	0.2204	0.945093	0.456397
Qinghai	2019	0.3104	0.2891	0.2725	0.2907	0.998582	0.538783
Ningxia	2019	0.1892	0.2206	0.3197	0.2432	0.975407	0.487051
Xinjiang	2019	0.2583	0.276	0.3563	0.2969	0.990197	0.542208
Beijing	2020	0.2551	0.1565	0.5156	0.3091	0.886735	0.523536
Tianjin	2020	0.1419	0.1911	0.2686	0.2005	0.966636	0.440239
Hebei	2020	0.2182	0.1594	0.4596	0.2791	0.902678	0.501934
Shanxi	2020	0.1866	0.3675	0.3326	0.2956	0.959493	0.532565
Inner Mongolia	2020	0.1808	0.3914	0.3522	0.3081	0.947976	0.540436
Liaoning	2020	0.2107	0.1668	0.326	0.2345	0.961354	0.474803
Jilin	2020	0.228	0.1338	0.3266	0.2295	0.937741	0.463909
Heilongjiang	2020	0.2809	0.1395	0.3349	0.2518	0.936876	0.485701
Shanghai	2020	0.2487	0.1527	0.2589	0.2201	0.973335	0.462851
Jiangsu	2020	0.2922	0.2558	0.4854	0.3445	0.961051	0.575397
Zhejiang	2020	0.3576	0.2365	0.4361	0.3434	0.969329	0.576947
Anhui	2020	0.307	0.1611	0.4342	0.3008	0.924155	0.527244
Fujian	2020	0.3356	0.1795	0.4184	0.3112	0.94225	0.541506
Jiangxi	2020	0.3808	0.1124	0.4375	0.3102	0.85597	0.515288
Shandong	2020	0.2099	0.2358	0.5151	0.3203	0.918976	0.542539
Henan	2020	0.2189	0.1647	0.5017	0.2951	0.889526	0.512347
Hubei	2020	0.352	0.1939	0.381	0.309	0.958893	0.544333
Hunan	2020	0.3883	0.1552	0.3722	0.3052	0.923946	0.531026
Guangdong	2020	0.3706	0.2403	0.5247	0.3785	0.951523	0.600126
Guangxi	2020	0.389	0.1501	0.4084	0.3158	0.911341	0.536471
Hainan	2020	0.3055	0.1713	0.3483	0.275	0.956875	0.512972
Chongqing	2020	0.3266	0.18	0.4277	0.3114	0.940685	0.541229
Sichuan	2020	0.326	0.2966	0.4732	0.3653	0.979192	0.598079
Guizhou	2020	0.3201	0.1847	0.3844	0.2964	0.955653	0.532218
Yunnan	2020	0.3205	0.2065	0.3567	0.2946	0.973868	0.535632
Shanxi	2020	0.2206	0.3243	0.3636	0.3028	0.978412	0.544301
Gansu	2020	0.1467	0.186	0.3403	0.2243	0.936932	0.458425
Qinghai	2020	0.3344	0.2791	0.2878	0.3004	0.996837	0.54722
Ningxia	2020	0.2008	0.2359	0.3367	0.2578	0.976402	0.501714
Xinjiang	2020	0.2521	0.2804	0.3672	0.2999	0.987282	0.544138
Beijing	2021	0.2881	0.16	0.478	0.3087	0.908156	0.529479
Tianjin	2021	0.1598	0.2143	0.2487	0.2076	0.983704	0.451904
Hebei	2021	0.2158	0.2677	0.4316	0.305	0.957737	0.540472
Shanxi	2021	0.1885	0.3487	0.301	0.2794	0.968018	0.520062
Inner Mongolia	2021	0.1908	0.2155	0.3376	0.248	0.969206	0.490268
Liaoning	2021	0.23	0.1933	0.3249	0.2494	0.976502	0.493497
Jilin	2021	0.2182	0.1441	0.3328	0.2317	0.944006	0.467682
Heilongjiang	2021	0.2717	0.1559	0.3438	0.2571	0.949705	0.494135
Shanghai	2021	0.2396	0.1568	0.2657	0.2207	0.975602	0.464021
Jiangsu	2021	0.2828	0.2355	0.4507	0.323	0.962166	0.557476
Zhejiang	2021	0.3994	0.2333	0.4243	0.3523	0.966893	0.583641
Anhui	2021	0.2685	0.4753	0.4219	0.3886	0.971796	0.614524
Fujian	2021	0.3399	0.2349	0.3938	0.3229	0.977567	0.561833
Jiangxi	2021	0.3563	0.1498	0.4613	0.3225	0.902164	0.539396
Shandong	2021	0.2204	0.2285	0.5056	0.3182	0.924656	0.542426
Henan	2021	0.2394	0.2274	0.5191	0.3286	0.926852	0.551873
Hubei	2021	0.3135	0.2376	0.417	0.3227	0.974109	0.560665
Hunan	2021	0.3605	0.167	0.3929	0.3068	0.935648	0.535777
Guangdong	2021	0.3545	0.2888	0.5042	0.3825	0.973436	0.610196
Guangxi	2021	0.3486	0.1458	0.37	0.2881	0.92293	0.515651
Hainan	2021	0.3323	0.1635	0.3638	0.2865	0.943616	0.519948
Chongqing	2021	0.3176	0.4123	0.4274	0.3858	0.991558	0.618501
Sichuan	2021	0.3171	0.2991	0.4941	0.3701	0.974145	0.600442
Guizhou	2021	0.2969	0.1898	0.3889	0.2919	0.958805	0.529032
Yunnan	2021	0.3112	0.2033	0.3714	0.2953	0.969935	0.535184
Shanxi	2021	0.2529	0.3164	0.3587	0.3093	0.989796	0.553303
Gansu	2021	0.1409	0.4953	0.3313	0.3225	0.883359	0.533745
Qinghai	2021	0.2941	0.2803	0.2862	0.2869	0.999806	0.535579
Ningxia	2021	0.2094	0.2508	0.3141	0.2581	0.986286	0.50454
Xinjiang	2021	0.2469	0.2884	0.3623	0.2992	0.987567	0.543581
Beijing	2022	0.2815	0.1743	0.4821	0.3126	0.918197	0.53575
Tianjin	2022	0.1423	0.203	0.2542	0.1998	0.972652	0.440835
Hebei	2022	0.2138	0.1887	0.4665	0.2897	0.918287	0.515779
Shanxi	2022	0.1905	0.4061	0.3207	0.3058	0.953862	0.540084
Inner Mongolia	2022	0.1746	0.4586	0.3331	0.3221	0.927599	0.546607
Liaoning	2022	0.2293	0.1987	0.3136	0.2472	0.981622	0.492602
Jilin	2022	0.2344	0.1531	0.3533	0.2469	0.944305	0.482855
Heilongjiang	2022	0.2504	0.1631	0.344	0.2525	0.955625	0.491218
Shanghai	2022	0.1897	0.1688	0.2754	0.2113	0.977766	0.454535
Jiangsu	2022	0.2661	0.2416	0.468	0.3252	0.956315	0.557668
Zhejiang	2022	0.3471	0.2374	0.4037	0.3294	0.976355	0.567108
Anhui	2022	0.2372	0.1665	0.4678	0.2905	0.910019	0.51416
Fujian	2022	0.3907	0.1923	0.3859	0.323	0.951206	0.554292
Jiangxi	2022	0.3706	0.123	0.441	0.3115	0.872794	0.521417
Shandong	2022	0.2084	0.2307	0.5156	0.3182	0.916235	0.53995
Henan	2022	0.2069	0.175	0.4734	0.2851	0.904368	0.507775
Hubei	2022	0.2772	0.192	0.4216	0.2969	0.949889	0.531057
Hunan	2022	0.3478	0.1614	0.3693	0.2928	0.938103	0.524096
Guangdong	2022	0.4188	0.2731	0.4503	0.3807	0.977213	0.609938
Guangxi	2022	0.3901	0.1484	0.3326	0.2904	0.923061	0.517742
Hainan	2022	0.3464	0.1898	0.3614	0.2992	0.960858	0.53618
Chongqing	2022	0.2506	0.1796	0.4427	0.291	0.931728	0.520704
Sichuan	2022	0.2844	0.2985	0.5203	0.3677	0.961265	0.594522
Guizhou	2022	0.2726	0.1962	0.3912	0.2867	0.961237	0.524964
Yunnan	2022	0.3162	0.2186	0.3905	0.3084	0.97256	0.547665
Shanxi	2022	0.2164	0.3287	0.3622	0.3024	0.976575	0.54343
Gansu	2022	0.1401	0.2187	0.3509	0.2366	0.932975	0.469832
Qinghai	2022	0.2668	0.2602	0.2844	0.2705	0.999295	0.519913
Ningxia	2022	0.2034	0.277	0.3289	0.2698	0.980942	0.514449
Xinjiang	2022	0.2501	0.3325	0.3591	0.3139	0.988361	0.556998

## Sheet: WE
Province	year	water-综合发展指数	energy-综合发展指数	carbon-综合发展指数	WE-T	WE-C	WE-D
Beijing	2008	0.2186	0.1329	0.3239	0.1758	0.969822	0.41291
Tianjin	2008	0.126	0.2034	0.232	0.1647	0.972002	0.400111
Hebei	2008	0.1937	0.1179	0.3018	0.1558	0.969961	0.388741
Shanxi	2008	0.1698	0.3524	0.1967	0.2611	0.936871	0.494588
Inner Mongolia	2008	0.166	0.3082	0.2711	0.2371	0.953979	0.475593
Liaoning	2008	0.1876	0.1269	0.2859	0.1573	0.981198	0.392864
Jilin	2008	0.1758	0.1619	0.2741	0.1689	0.999153	0.4108
Heilongjiang	2008	0.2152	0.2038	0.2479	0.2095	0.99963	0.457627
Shanghai	2008	0.181	0.1452	0.2475	0.1631	0.993959	0.402635
Jiangsu	2008	0.2475	0.1613	0.3972	0.2044	0.977516	0.446995
Zhejiang	2008	0.3182	0.1561	0.4045	0.2372	0.939785	0.472141
Anhui	2008	0.2299	0.1505	0.2796	0.1902	0.977974	0.431289
Fujian	2008	0.3533	0.1808	0.2769	0.2671	0.946408	0.502778
Jiangxi	2008	0.3246	0.1139	0.2716	0.2193	0.876994	0.438548
Shandong	2008	0.1984	0.1882	0.4254	0.1933	0.999652	0.439582
Henan	2008	0.1988	0.1592	0.2388	0.179	0.993863	0.421784
Hubei	2008	0.2513	0.2111	0.268	0.2312	0.996214	0.479921
Hunan	2008	0.3136	0.1668	0.2599	0.2402	0.952167	0.478237
Guangdong	2008	0.4063	0.1973	0.3138	0.3018	0.93814	0.5321
Guangxi	2008	0.3685	0.1663	0.2639	0.2674	0.925771	0.497545
Hainan	2008	0.339	0.1684	0.3043	0.2537	0.941782	0.488805
Chongqing	2008	0.2357	0.1739	0.2556	0.2048	0.988552	0.449951
Sichuan	2008	0.2639	0.2418	0.2687	0.2529	0.999045	0.502651
Guizhou	2008	0.2434	0.2148	0.1898	0.2291	0.99805	0.478177
Yunnan	2008	0.3259	0.2151	0.2278	0.2705	0.978803	0.514554
Shanxi	2008	0.1731	0.2566	0.2458	0.2149	0.980938	0.459133
Gansu	2008	0.1275	0.2097	0.1877	0.1686	0.969833	0.404368
Qinghai	2008	0.2354	0.224	0.2165	0.2297	0.999692	0.479196
Ningxia	2008	0.2462	0.2567	0.1829	0.2515	0.999782	0.501443
Xinjiang	2008	0.2399	0.236	0.2091	0.238	0.999966	0.487844
Beijing	2009	0.227	0.1288	0.4163	0.1779	0.961158	0.413509
Tianjin	2009	0.1245	0.1948	0.2392	0.1597	0.975462	0.394691
Hebei	2009	0.1972	0.1012	0.3371	0.1492	0.946836	0.375856
Shanxi	2009	0.1726	0.3081	0.2246	0.2404	0.959449	0.480262
Inner Mongolia	2009	0.1669	0.3225	0.2976	0.2447	0.948111	0.481667
Liaoning	2009	0.1904	0.1227	0.3107	0.1566	0.976344	0.391018
Jilin	2009	0.1795	0.1435	0.2844	0.1615	0.993769	0.400617
Heilongjiang	2009	0.2363	0.1892	0.2771	0.2128	0.993855	0.459883
Shanghai	2009	0.1962	0.1578	0.2558	0.177	0.994099	0.419471
Jiangsu	2009	0.2506	0.1512	0.3909	0.2009	0.968917	0.441198
Zhejiang	2009	0.3322	0.1599	0.3095	0.2461	0.9367	0.480127
Anhui	2009	0.2376	0.1382	0.2924	0.1879	0.964385	0.425685
Fujian	2009	0.3227	0.156	0.2829	0.2394	0.937407	0.473725
Jiangxi	2009	0.3177	0.0974	0.305	0.2076	0.84755	0.419466
Shandong	2009	0.2016	0.1647	0.45	0.1832	0.994913	0.426929
Henan	2009	0.2073	0.1419	0.2513	0.1746	0.982306	0.414138
Hubei	2009	0.2461	0.2096	0.2882	0.2279	0.996787	0.476621
Hunan	2009	0.3071	0.1507	0.2903	0.2289	0.939833	0.463819
Guangdong	2009	0.3642	0.2069	0.3545	0.2856	0.96132	0.523978
Guangxi	2009	0.3212	0.1668	0.2901	0.244	0.948628	0.481108
Hainan	2009	0.3705	0.1567	0.3216	0.2636	0.914078	0.490868
Chongqing	2009	0.2364	0.1671	0.3061	0.2018	0.985141	0.445872
Sichuan	2009	0.2681	0.2258	0.2805	0.247	0.996326	0.496077
Guizhou	2009	0.2331	0.1937	0.1871	0.2134	0.99573	0.460965
Yunnan	2009	0.2917	0.2	0.2708	0.2459	0.982456	0.491514
Shanxi	2009	0.1953	0.2772	0.2765	0.2363	0.984863	0.482414
Gansu	2009	0.1354	0.2307	0.2003	0.1831	0.965525	0.420461
Qinghai	2009	0.3049	0.2609	0.2195	0.2829	0.996972	0.531077
Ningxia	2009	0.2511	0.2696	0.2707	0.2604	0.999369	0.510133
Xinjiang	2009	0.2382	0.2461	0.2628	0.2422	0.999867	0.492105
Beijing	2010	0.2343	0.119	0.4108	0.1767	0.945248	0.408687
Tianjin	2010	0.1388	0.1915	0.2495	0.1652	0.98719	0.403836
Hebei	2010	0.2005	0.0958	0.4197	0.1482	0.935488	0.372343
Shanxi	2010	0.1708	0.2082	0.2559	0.1895	0.995119	0.434252
Inner Mongolia	2010	0.172	0.1783	0.3353	0.1752	0.999838	0.418535
Liaoning	2010	0.2229	0.1173	0.3247	0.1701	0.950604	0.402117
Jilin	2010	0.2208	0.1443	0.3128	0.1826	0.977802	0.422548
Heilongjiang	2010	0.2296	0.1924	0.3032	0.211	0.996107	0.458452
Shanghai	2010	0.1915	0.1447	0.2282	0.1681	0.990264	0.407999
Jiangsu	2010	0.2498	0.1431	0.4261	0.1965	0.962419	0.434874
Zhejiang	2010	0.3895	0.1597	0.3613	0.2746	0.908251	0.499405
Anhui	2010	0.2606	0.1065	0.3101	0.1836	0.907627	0.408216
Fujian	2010	0.431	0.1701	0.3034	0.3006	0.900895	0.520393
Jiangxi	2010	0.422	0.1003	0.3526	0.2612	0.787801	0.453623
Shandong	2010	0.2023	0.1521	0.4699	0.1772	0.989917	0.418824
Henan	2010	0.2061	0.1117	0.257	0.1589	0.954864	0.389523
Hubei	2010	0.281	0.198	0.2836	0.2395	0.984873	0.485672
Hunan	2010	0.3613	0.1474	0.2793	0.2544	0.9073	0.480434
Guangdong	2010	0.4106	0.1992	0.7726	0.3049	0.937987	0.534782
Guangxi	2010	0.3718	0.1554	0.3062	0.2636	0.911874	0.490275
Hainan	2010	0.3674	0.1449	0.3396	0.2562	0.900761	0.48039
Chongqing	2010	0.2453	0.1537	0.3577	0.1995	0.973291	0.440649
Sichuan	2010	0.2803	0.2358	0.2859	0.2581	0.996276	0.507089
Guizhou	2010	0.2604	0.1486	0.2124	0.2045	0.961915	0.443522
Yunnan	2010	0.3151	0.1851	0.2837	0.2501	0.965637	0.491432
Shanxi	2010	0.2021	0.2165	0.3072	0.2093	0.999408	0.457358
Gansu	2010	0.1385	0.224	0.2023	0.1813	0.971787	0.419744
Qinghai	2010	0.2651	0.2338	0.2271	0.2495	0.99803	0.499008
Ningxia	2010	0.2511	0.193	0.2772	0.2221	0.991405	0.469245
Xinjiang	2010	0.2587	0.2176	0.2594	0.2382	0.99627	0.487146
Beijing	2011	0.2349	0.1192	0.4036	0.1771	0.945113	0.40912
Tianjin	2011	0.1301	0.1799	0.3019	0.155	0.987012	0.391135
Hebei	2011	0.1996	0.105	0.5048	0.1523	0.95055	0.380485
Shanxi	2011	0.1756	0.1991	0.2747	0.1874	0.998031	0.432471
Inner Mongolia	2011	0.1676	0.1756	0.4135	0.1716	0.999728	0.41419
Liaoning	2011	0.1987	0.115	0.3902	0.1569	0.963748	0.38886
Jilin	2011	0.1875	0.1266	0.3089	0.1571	0.981024	0.39258
Heilongjiang	2011	0.226	0.1823	0.3193	0.2042	0.994256	0.450585
Shanghai	2011	0.1726	0.1404	0.2321	0.1565	0.994694	0.39455
Jiangsu	2011	0.2588	0.157	0.4652	0.2079	0.969566	0.448969
Zhejiang	2011	0.3039	0.168	0.3361	0.236	0.957635	0.475397
Anhui	2011	0.2349	0.1082	0.353	0.1716	0.929318	0.399338
Fujian	2011	0.3204	0.146	0.3343	0.2332	0.927458	0.465063
Jiangxi	2011	0.3131	0.0948	0.3853	0.204	0.844738	0.415122
Shandong	2011	0.2068	0.1669	0.5179	0.1869	0.994284	0.431082
Henan	2011	0.2091	0.1193	0.2703	0.1642	0.961887	0.397419
Hubei	2011	0.2492	0.1686	0.3278	0.2089	0.981215	0.452743
Hunan	2011	0.2891	0.1325	0.2832	0.2108	0.928456	0.442401
Guangdong	2011	0.3553	0.2039	0.4067	0.2796	0.962651	0.518804
Guangxi	2011	0.3121	0.1486	0.3255	0.2304	0.934906	0.464115
Hainan	2011	0.388	0.1337	0.3509	0.2609	0.873154	0.47729
Chongqing	2011	0.2476	0.1523	0.4329	0.2	0.971189	0.440724
Sichuan	2011	0.2683	0.2492	0.3108	0.2588	0.999319	0.508551
Guizhou	2011	0.2213	0.1365	0.2349	0.1789	0.971509	0.416897
Yunnan	2011	0.2871	0.189	0.3069	0.2381	0.978542	0.482691
Shanxi	2011	0.2171	0.2092	0.303	0.2132	0.999828	0.461696
Gansu	2011	0.1384	0.19	0.2104	0.1642	0.987579	0.402691
Qinghai	2011	0.2666	0.2639	0.2468	0.2653	0.999987	0.515069
Ningxia	2011	0.2511	0.2024	0.2716	0.2268	0.994217	0.474856
Xinjiang	2011	0.2448	0.2113	0.2841	0.2281	0.997299	0.476953
Beijing	2012	0.2351	0.1319	0.4563	0.1835	0.95965	0.419638
Tianjin	2012	0.1429	0.1683	0.3022	0.1556	0.996664	0.393803
Hebei	2012	0.2	0.1046	0.4525	0.1523	0.949688	0.380312
Shanxi	2012	0.1748	0.2024	0.3147	0.1886	0.997319	0.433699
Inner Mongolia	2012	0.1739	0.141	0.4474	0.1575	0.994527	0.395775
Liaoning	2012	0.221	0.1273	0.5047	0.1742	0.963134	0.409607
Jilin	2012	0.2045	0.125	0.3134	0.1648	0.970457	0.399914
Heilongjiang	2012	0.242	0.1683	0.3477	0.2052	0.983735	0.449291
Shanghai	2012	0.2042	0.1497	0.232	0.177	0.988071	0.418197
Jiangsu	2012	0.2484	0.1733	0.4982	0.2109	0.984014	0.455553
Zhejiang	2012	0.3962	0.1775	0.3986	0.2869	0.924489	0.51501
Anhui	2012	0.2416	0.1197	0.3724	0.1807	0.941364	0.412437
Fujian	2012	0.4236	0.178	0.3497	0.3008	0.912873	0.524015
Jiangxi	2012	0.418	0.0972	0.4173	0.2576	0.782484	0.448963
Shandong	2012	0.1973	0.1694	0.5692	0.1834	0.997101	0.427631
Henan	2012	0.1975	0.1252	0.2937	0.1614	0.974578	0.396607
Hubei	2012	0.256	0.1772	0.3417	0.2166	0.983317	0.461504
Hunan	2012	0.3641	0.1481	0.307	0.2561	0.906731	0.481886
Guangdong	2012	0.4084	0.2108	0.3993	0.3096	0.947714	0.541675
Guangxi	2012	0.3916	0.1542	0.3431	0.2729	0.900451	0.495715
Hainan	2012	0.337	0.1373	0.3507	0.2372	0.907041	0.463843
Chongqing	2012	0.247	0.1735	0.4191	0.2103	0.984605	0.455041
Sichuan	2012	0.2969	0.2424	0.3286	0.2697	0.994881	0.517995
Guizhou	2012	0.2601	0.1337	0.2616	0.1969	0.947088	0.431835
Yunnan	2012	0.2957	0.2016	0.3155	0.2487	0.981934	0.494173
Shanxi	2012	0.1987	0.208	0.3195	0.2034	0.999739	0.45094
Gansu	2012	0.1382	0.188	0.2504	0.1631	0.988278	0.401482
Qinghai	2012	0.2977	0.2806	0.2546	0.2892	0.999563	0.537656
Ningxia	2012	0.2196	0.1754	0.2787	0.1975	0.99372	0.443012
Xinjiang	2012	0.2614	0.2321	0.3329	0.2468	0.998236	0.496351
Beijing	2013	0.2365	0.1428	0.5004	0.1897	0.969007	0.428743
Tianjin	2013	0.1282	0.1688	0.3199	0.1485	0.990612	0.383544
Hebei	2013	0.2007	0.1314	0.4564	0.1661	0.977986	0.403043
Shanxi	2013	0.1782	0.2093	0.3309	0.1938	0.996774	0.439517
Inner Mongolia	2013	0.1814	0.1932	0.4792	0.1873	0.999504	0.432674
Liaoning	2013	0.2162	0.149	0.3928	0.1826	0.982925	0.423653
Jilin	2013	0.2186	0.1467	0.3151	0.1827	0.980439	0.423233
Heilongjiang	2013	0.2748	0.1694	0.3805	0.2221	0.971441	0.464497
Shanghai	2013	0.1758	0.1489	0.2547	0.1624	0.996562	0.402296
Jiangsu	2013	0.2509	0.1955	0.5816	0.2232	0.992269	0.470611
Zhejiang	2013	0.3338	0.2019	0.4063	0.2679	0.969214	0.509561
Anhui	2013	0.2374	0.1437	0.4412	0.1906	0.969304	0.429825
Fujian	2013	0.384	0.1959	0.3785	0.29	0.945932	0.523756
Jiangxi	2013	0.346	0.1103	0.3882	0.2282	0.856259	0.442039
Shandong	2013	0.1962	0.1902	0.6139	0.1932	0.999879	0.439519
Henan	2013	0.2043	0.152	0.3303	0.1782	0.989168	0.419845
Hubei	2013	0.2683	0.1815	0.3355	0.2249	0.981204	0.469758
Hunan	2013	0.3329	0.147	0.3273	0.24	0.921923	0.470385
Guangdong	2013	0.4223	0.2169	0.4354	0.3196	0.946964	0.550136
Guangxi	2013	0.3909	0.1521	0.3582	0.2715	0.898106	0.493797
Hainan	2013	0.3967	0.1363	0.3571	0.2665	0.872533	0.482214
Chongqing	2013	0.2498	0.1676	0.4085	0.2087	0.980417	0.452342
Sichuan	2013	0.2832	0.2475	0.352	0.2654	0.997735	0.514586
Guizhou	2013	0.2521	0.1286	0.3024	0.1904	0.945919	0.424385
Yunnan	2013	0.2969	0.2118	0.3366	0.2544	0.985908	0.500814
Shanxi	2013	0.2017	0.2332	0.335	0.2175	0.997373	0.465756
Gansu	2013	0.1405	0.2037	0.3011	0.1721	0.982998	0.411308
Qinghai	2013	0.2386	0.2824	0.2541	0.2605	0.99646	0.509488
Ningxia	2013	0.2203	0.1827	0.3059	0.2015	0.995638	0.447907
Xinjiang	2013	0.2621	0.2713	0.3605	0.2667	0.999851	0.516392
Beijing	2014	0.2344	0.1592	0.6014	0.1968	0.981579	0.439516
Tianjin	2014	0.1214	0.1741	0.3393	0.1478	0.983969	0.381354
Hebei	2014	0.1964	0.1697	0.4515	0.1831	0.997337	0.427332
Shanxi	2014	0.1847	0.3512	0.3248	0.268	0.950511	0.504715
Inner Mongolia	2014	0.17	0.4429	0.5307	0.3065	0.895401	0.523871
Liaoning	2014	0.1968	0.165	0.3758	0.1809	0.99613	0.4245
Jilin	2014	0.1916	0.1501	0.3295	0.1709	0.992597	0.411868
Heilongjiang	2014	0.2503	0.1812	0.3473	0.2158	0.987094	0.461535
Shanghai	2014	0.2165	0.1582	0.2808	0.1874	0.987822	0.430253
Jiangsu	2014	0.271	0.1906	0.5896	0.2308	0.984714	0.476731
Zhejiang	2014	0.3674	0.2172	0.4417	0.2923	0.966431	0.531496
Anhui	2014	0.256	0.145	0.4285	0.2005	0.960925	0.438937
Fujian	2014	0.3863	0.2069	0.3496	0.2966	0.953172	0.531706
Jiangxi	2014	0.3728	0.1156	0.3869	0.2442	0.850102	0.455626
Shandong	2014	0.1967	0.2586	0.6126	0.2277	0.990715	0.474959
Henan	2014	0.2017	0.1673	0.342	0.1845	0.995645	0.428598
Hubei	2014	0.285	0.1897	0.3611	0.2374	0.979641	0.482252
Hunan	2014	0.3615	0.1547	0.335	0.2581	0.916244	0.486295
Guangdong	2014	0.3764	0.224	0.4225	0.3002	0.967249	0.538858
Guangxi	2014	0.3798	0.163	0.3551	0.2714	0.916772	0.498811
Hainan	2014	0.3477	0.1383	0.3587	0.243	0.902417	0.468281
Chongqing	2014	0.2895	0.1849	0.392	0.2372	0.975389	0.481001
Sichuan	2014	0.287	0.2748	0.3721	0.2809	0.999764	0.529938
Guizhou	2014	0.2955	0.1872	0.3361	0.2414	0.974506	0.485021
Yunnan	2014	0.2964	0.2235	0.3298	0.26	0.99012	0.507377
Shanxi	2014	0.2042	0.3294	0.3691	0.2668	0.972084	0.509266
Gansu	2014	0.1403	0.1998	0.3001	0.1701	0.984578	0.409239
Qinghai	2014	0.2741	0.2817	0.2689	0.2779	0.999907	0.527138
Ningxia	2014	0.2343	0.2726	0.3161	0.2535	0.997141	0.502768
Xinjiang	2014	0.2473	0.3178	0.3937	0.2826	0.992187	0.529521
Beijing	2015	0.2443	0.1668	0.5346	0.2056	0.98207	0.449348
Tianjin	2015	0.129	0.1878	0.3014	0.1584	0.982624	0.394522
Hebei	2015	0.2026	0.1568	0.4307	0.1797	0.991847	0.422179
Shanxi	2015	0.1841	0.3487	0.3546	0.2664	0.951084	0.503357
Inner Mongolia	2015	0.1698	0.3776	0.5245	0.2737	0.925145	0.503202
Liaoning	2015	0.1989	0.14	0.3907	0.1695	0.984781	0.408559
Jilin	2015	0.1977	0.1395	0.3438	0.1686	0.984992	0.407517
Heilongjiang	2015	0.2461	0.1687	0.3483	0.2074	0.982437	0.451395
Shanghai	2015	0.247	0.1605	0.2768	0.2038	0.977211	0.446269
Jiangsu	2015	0.2871	0.217	0.62	0.2521	0.990284	0.49965
Zhejiang	2015	0.405	0.2156	0.4337	0.3103	0.952292	0.543596
Anhui	2015	0.2705	0.1479	0.4399	0.2092	0.956106	0.447233
Fujian	2015	0.4139	0.2073	0.3696	0.3106	0.943074	0.54122
Jiangxi	2015	0.4141	0.1206	0.3889	0.2674	0.835884	0.472774
Shandong	2015	0.198	0.2194	0.5686	0.2087	0.998685	0.456536
Henan	2015	0.2072	0.1541	0.3447	0.1807	0.989141	0.422774
Hubei	2015	0.2942	0.176	0.3378	0.2351	0.967888	0.477022
Hunan	2015	0.3712	0.1616	0.4534	0.2664	0.91937	0.494894
Guangdong	2015	0.4018	0.2269	0.4319	0.3144	0.960525	0.549535
Guangxi	2015	0.4204	0.1785	0.3776	0.2995	0.9148	0.523433
Hainan	2015	0.2703	0.1381	0.3475	0.2042	0.946159	0.439552
Chongqing	2015	0.2588	0.188	0.385	0.2234	0.987365	0.469657
Sichuan	2015	0.2838	0.2799	0.3621	0.2819	0.999976	0.530936
Guizhou	2015	0.2956	0.1828	0.3383	0.2392	0.971805	0.482137
Yunnan	2015	0.3082	0.2332	0.3243	0.2707	0.990358	0.517774
Shanxi	2015	0.2021	0.3253	0.3611	0.2637	0.972333	0.506364
Gansu	2015	0.1419	0.178	0.2935	0.16	0.993612	0.39872
Qinghai	2015	0.227	0.2857	0.2624	0.2564	0.993424	0.504692
Ningxia	2015	0.2443	0.2631	0.328	0.2537	0.999313	0.503513
Xinjiang	2015	0.2572	0.3057	0.3692	0.2815	0.996281	0.529578
Beijing	2016	0.2477	0.1742	0.6284	0.211	0.984708	0.455822
Tianjin	2016	0.136	0.1746	0.2883	0.1553	0.992248	0.392551
Hebei	2016	0.1973	0.1384	0.4325	0.1679	0.984488	0.406565
Shanxi	2016	0.1833	0.2988	0.4346	0.2411	0.970877	0.483817
Inner Mongolia	2016	0.1778	0.3678	0.5006	0.2728	0.937405	0.505692
Liaoning	2016	0.2111	0.151	0.323	0.1811	0.98613	0.422597
Jilin	2016	0.216	0.1318	0.3382	0.1739	0.970253	0.410764
Heilongjiang	2016	0.2507	0.1426	0.3546	0.1967	0.961486	0.434884
Shanghai	2016	0.2466	0.1872	0.2836	0.2169	0.990581	0.463527
Jiangsu	2016	0.3103	0.2248	0.5622	0.2676	0.987152	0.513967
Zhejiang	2016	0.3915	0.2177	0.5123	0.3046	0.958441	0.540316
Anhui	2016	0.3018	0.1638	0.4716	0.2328	0.955066	0.471529
Fujian	2016	0.5083	0.2066	0.3615	0.3575	0.906588	0.569302
Jiangxi	2016	0.4295	0.1104	0.4205	0.27	0.806646	0.466684
Shandong	2016	0.2046	0.2572	0.6076	0.2309	0.993492	0.478954
Henan	2016	0.2139	0.1785	0.379	0.1962	0.995922	0.442041
Hubei	2016	0.3254	0.1966	0.4168	0.261	0.969081	0.502922
Hunan	2016	0.39	0.1519	0.3505	0.271	0.898301	0.493396
Guangdong	2016	0.4445	0.2205	0.471	0.3325	0.941561	0.559526
Guangxi	2016	0.4004	0.163	0.3615	0.2817	0.906889	0.505441
Hainan	2016	0.399	0.1539	0.352	0.2765	0.896374	0.497843
Chongqing	2016	0.2814	0.1715	0.3917	0.2265	0.970112	0.468754
Sichuan	2016	0.2874	0.281	0.4026	0.2842	0.999937	0.533087
Guizhou	2016	0.2856	0.1619	0.3558	0.2238	0.961036	0.463767
Yunnan	2016	0.3199	0.2049	0.3401	0.2624	0.975695	0.505987
Shanxi	2016	0.1993	0.3037	0.3878	0.2515	0.978223	0.496007
Gansu	2016	0.1456	0.1692	0.3189	0.1574	0.997186	0.396178
Qinghai	2016	0.2382	0.2539	0.2747	0.2461	0.999491	0.495958
Ningxia	2016	0.2166	0.2371	0.3464	0.2269	0.998979	0.476097
Xinjiang	2016	0.2632	0.2667	0.3951	0.265	0.999978	0.514776
Beijing	2017	0.2422	0.191	0.6274	0.2166	0.992991	0.463769
Tianjin	2017	0.1343	0.1769	0.3281	0.1556	0.990586	0.392601
Hebei	2017	0.2045	0.1527	0.5116	0.1786	0.989429	0.420371
Shanxi	2017	0.1828	0.3352	0.3453	0.259	0.955741	0.497531
Inner Mongolia	2017	0.1763	0.3778	0.4728	0.2771	0.931535	0.508063
Liaoning	2017	0.1978	0.1636	0.358	0.1807	0.995512	0.424133
Jilin	2017	0.2	0.1264	0.322	0.1632	0.974245	0.398744
Heilongjiang	2017	0.2432	0.1381	0.3407	0.1907	0.961262	0.42815
Shanghai	2017	0.1953	0.1832	0.2715	0.1893	0.999489	0.434975
Jiangsu	2017	0.27	0.2269	0.5461	0.2485	0.996231	0.497557
Zhejiang	2017	0.3395	0.2034	0.445	0.2715	0.968067	0.51267
Anhui	2017	0.2629	0.1592	0.4799	0.2111	0.969352	0.452361
Fujian	2017	0.3686	0.1898	0.3866	0.2792	0.94735	0.514296
Jiangxi	2017	0.37	0.1086	0.43	0.2393	0.83767	0.447721
Shandong	2017	0.1966	0.2598	0.6663	0.2282	0.990366	0.475396
Henan	2017	0.2159	0.1738	0.4947	0.1949	0.994147	0.440181
Hubei	2017	0.3107	0.1854	0.4098	0.2481	0.967579	0.489955
Hunan	2017	0.3631	0.146	0.3566	0.2546	0.904516	0.479885
Guangdong	2017	0.3829	0.2385	0.4802	0.3107	0.972625	0.549722
Guangxi	2017	0.4074	0.1563	0.3625	0.2819	0.895307	0.502381
Hainan	2017	0.349	0.1587	0.3614	0.2539	0.927095	0.485169
Chongqing	2017	0.2853	0.1736	0.4214	0.2295	0.969924	0.471802
Sichuan	2017	0.2908	0.2831	0.413	0.287	0.99991	0.5357
Guizhou	2017	0.2828	0.1581	0.3962	0.2205	0.95917	0.459888
Yunnan	2017	0.3302	0.1933	0.3465	0.2618	0.965201	0.502682
Shanxi	2017	0.2121	0.3034	0.3895	0.2578	0.984191	0.503711
Gansu	2017	0.1449	0.172	0.324	0.1585	0.996337	0.397391
Qinghai	2017	0.2777	0.2336	0.274	0.2557	0.996273	0.504725
Ningxia	2017	0.2095	0.2122	0.3354	0.2109	0.99998	0.459234
Xinjiang	2017	0.2564	0.2494	0.4329	0.2529	0.999904	0.502868
Beijing	2018	0.2652	0.1837	0.5874	0.2245	0.983381	0.469861
Tianjin	2018	0.1541	0.1902	0.2666	0.1722	0.994488	0.413825
Hebei	2018	0.2064	0.1725	0.3873	0.1895	0.99599	0.434442
Shanxi	2018	0.1858	0.353	0.3126	0.2694	0.950632	0.506064
Inner Mongolia	2018	0.1821	0.398	0.362	0.2901	0.928162	0.518902
Liaoning	2018	0.1972	0.1685	0.3117	0.1829	0.996916	0.427008
Jilin	2018	0.2119	0.1295	0.3408	0.1707	0.970436	0.407005
Heilongjiang	2018	0.2583	0.1427	0.3281	0.2005	0.957546	0.438164
Shanghai	2018	0.2057	0.1861	0.2738	0.1959	0.998748	0.442329
Jiangsu	2018	0.2742	0.2432	0.4498	0.2587	0.998203	0.508169
Zhejiang	2018	0.3343	0.2164	0.4026	0.2754	0.976814	0.518666
Anhui	2018	0.2634	0.161	0.4274	0.2122	0.970455	0.453796
Fujian	2018	0.3392	0.1845	0.3918	0.2619	0.955374	0.500212
Jiangxi	2018	0.3319	0.1104	0.4325	0.2212	0.865568	0.437566
Shandong	2018	0.2037	0.2685	0.5187	0.2361	0.990539	0.483597
Henan	2018	0.219	0.1814	0.4334	0.2002	0.995581	0.446447
Hubei	2018	0.2871	0.1893	0.3533	0.2382	0.978701	0.482832
Hunan	2018	0.3305	0.1448	0.3319	0.2377	0.920518	0.467768
Guangdong	2018	0.397	0.2415	0.4244	0.3193	0.969891	0.556495
Guangxi	2018	0.3776	0.1525	0.3505	0.2651	0.905364	0.48991
Hainan	2018	0.3777	0.1691	0.3387	0.2734	0.924372	0.502716
Chongqing	2018	0.2772	0.1687	0.4068	0.223	0.969944	0.465078
Sichuan	2018	0.3135	0.2904	0.428	0.302	0.999268	0.549344
Guizhou	2018	0.2885	0.1622	0.3609	0.2254	0.959933	0.465155
Yunnan	2018	0.3391	0.2004	0.3404	0.2698	0.966387	0.510619
Shanxi	2018	0.2084	0.312	0.3171	0.2602	0.979984	0.504967
Gansu	2018	0.1487	0.1713	0.316	0.16	0.997503	0.3995
Qinghai	2018	0.3187	0.2558	0.2722	0.2873	0.993988	0.53439
Ningxia	2018	0.1714	0.2014	0.3304	0.1864	0.996757	0.43104
Xinjiang	2018	0.2491	0.2716	0.3456	0.2604	0.999066	0.510056
Beijing	2019	0.2706	0.1659	0.5975	0.2183	0.970807	0.460355
Tianjin	2019	0.1456	0.1961	0.2574	0.1709	0.989019	0.411124
Hebei	2019	0.2098	0.1826	0.4048	0.1962	0.997595	0.442412
Shanxi	2019	0.1848	0.3596	0.3288	0.2722	0.94705	0.507727
Inner Mongolia	2019	0.1772	0.4102	0.3474	0.2937	0.917964	0.519236
Liaoning	2019	0.2064	0.1766	0.2944	0.1915	0.996968	0.436943
Jilin	2019	0.2137	0.1295	0.3154	0.1716	0.969438	0.407867
Heilongjiang	2019	0.2762	0.1361	0.3069	0.2062	0.940497	0.440375
Shanghai	2019	0.2266	0.173	0.2705	0.1998	0.990963	0.444966
Jiangsu	2019	0.2559	0.2596	0.4416	0.2578	0.999974	0.507734
Zhejiang	2019	0.3867	0.2235	0.3998	0.3051	0.963571	0.542204
Anhui	2019	0.2289	0.1571	0.4384	0.193	0.982548	0.435467
Fujian	2019	0.4058	0.1874	0.3923	0.2966	0.929757	0.525134
Jiangxi	2019	0.407	0.1235	0.4498	0.2653	0.845231	0.47354
Shandong	2019	0.1969	0.2674	0.4811	0.2322	0.988405	0.47907
Henan	2019	0.2112	0.1741	0.4692	0.1927	0.995353	0.437955
Hubei	2019	0.2687	0.183	0.3814	0.2259	0.981837	0.470953
Hunan	2019	0.377	0.1434	0.3382	0.2602	0.893589	0.482195
Guangdong	2019	0.4097	0.2404	0.4663	0.3251	0.965495	0.560252
Guangxi	2019	0.4	0.1475	0.3568	0.2738	0.887303	0.492893
Hainan	2019	0.2997	0.1829	0.3421	0.2413	0.970271	0.483866
Chongqing	2019	0.2717	0.1683	0.4093	0.22	0.971995	0.462427
Sichuan	2019	0.3058	0.2975	0.4479	0.3017	0.999905	0.549246
Guizhou	2019	0.301	0.1671	0.3738	0.2341	0.958215	0.473622
Yunnan	2019	0.2962	0.2142	0.354	0.2552	0.98701	0.501881
Shanxi	2019	0.2155	0.3243	0.2745	0.2699	0.979477	0.51416
Gansu	2019	0.1458	0.1912	0.3242	0.1685	0.990884	0.408612
Qinghai	2019	0.3104	0.2891	0.2725	0.2998	0.999369	0.547367
Ningxia	2019	0.1892	0.2206	0.3197	0.2049	0.99706	0.451993
Xinjiang	2019	0.2583	0.276	0.3563	0.2672	0.999451	0.516772
Beijing	2020	0.2551	0.1565	0.5156	0.2058	0.970883	0.446999
Tianjin	2020	0.1419	0.1911	0.2686	0.1665	0.989025	0.405799
Hebei	2020	0.2182	0.1594	0.4596	0.1888	0.987801	0.431853
Shanxi	2020	0.1866	0.3675	0.3326	0.2771	0.945206	0.511778
Inner Mongolia	2020	0.1808	0.3914	0.3522	0.2861	0.929805	0.515768
Liaoning	2020	0.2107	0.1668	0.326	0.1888	0.993215	0.433035
Jilin	2020	0.228	0.1338	0.3266	0.1809	0.96551	0.417924
Heilongjiang	2020	0.2809	0.1395	0.3349	0.2102	0.941738	0.44492
Shanghai	2020	0.2487	0.1527	0.2589	0.2007	0.970979	0.441447
Jiangsu	2020	0.2922	0.2558	0.4854	0.274	0.997792	0.522872
Zhejiang	2020	0.3576	0.2365	0.4361	0.2971	0.979005	0.539317
Anhui	2020	0.307	0.1611	0.4342	0.2341	0.950185	0.471634
Fujian	2020	0.3356	0.1795	0.4184	0.2576	0.952975	0.495466
Jiangxi	2020	0.3808	0.1124	0.4375	0.2466	0.838955	0.454848
Shandong	2020	0.2099	0.2358	0.5151	0.2229	0.99831	0.471724
Henan	2020	0.2189	0.1647	0.5017	0.1918	0.989968	0.435747
Hubei	2020	0.352	0.1939	0.381	0.273	0.957144	0.511175
Hunan	2020	0.3883	0.1552	0.3722	0.2718	0.903358	0.495513
Guangdong	2020	0.3706	0.2403	0.5247	0.3055	0.976989	0.546324
Guangxi	2020	0.389	0.1501	0.4084	0.2696	0.896449	0.491612
Hainan	2020	0.3055	0.1713	0.3483	0.2384	0.959573	0.478291
Chongqing	2020	0.3266	0.18	0.4277	0.2533	0.957214	0.492405
Sichuan	2020	0.326	0.2966	0.4732	0.3113	0.998884	0.557631
Guizhou	2020	0.3201	0.1847	0.3844	0.2524	0.963356	0.493104
Yunnan	2020	0.3205	0.2065	0.3567	0.2635	0.976323	0.507209
Shanxi	2020	0.2206	0.3243	0.3636	0.2725	0.981724	0.517223
Gansu	2020	0.1467	0.186	0.3403	0.1664	0.992999	0.406491
Qinghai	2020	0.3344	0.2791	0.2878	0.3068	0.995929	0.552767
Ningxia	2020	0.2008	0.2359	0.3367	0.2184	0.996765	0.466576
Xinjiang	2020	0.2521	0.2804	0.3672	0.2663	0.998587	0.515678
Beijing	2021	0.2881	0.16	0.478	0.2241	0.958267	0.463409
Tianjin	2021	0.1598	0.2143	0.2487	0.1871	0.989331	0.430237
Hebei	2021	0.2158	0.2677	0.4316	0.2418	0.994222	0.490309
Shanxi	2021	0.1885	0.3487	0.301	0.2686	0.954499	0.506338
Inner Mongolia	2021	0.1908	0.2155	0.3376	0.2032	0.99815	0.45036
Liaoning	2021	0.23	0.1933	0.3249	0.2117	0.996234	0.459242
Jilin	2021	0.2182	0.1441	0.3328	0.1812	0.978861	0.421153
Heilongjiang	2021	0.2717	0.1559	0.3438	0.2138	0.962632	0.453664
Shanghai	2021	0.2396	0.1568	0.2657	0.1982	0.977941	0.440259
Jiangsu	2021	0.2828	0.2355	0.4507	0.2592	0.995827	0.508054
Zhejiang	2021	0.3994	0.2333	0.4243	0.3164	0.964925	0.552542
Anhui	2021	0.2685	0.4753	0.4219	0.3719	0.960572	0.597693
Fujian	2021	0.3399	0.2349	0.3938	0.2874	0.983174	0.531568
Jiangxi	2021	0.3563	0.1498	0.4613	0.2531	0.912972	0.480701
Shandong	2021	0.2204	0.2285	0.5056	0.2245	0.999837	0.473776
Henan	2021	0.2394	0.2274	0.5191	0.2334	0.99967	0.483035
Hubei	2021	0.3135	0.2376	0.417	0.2756	0.990471	0.522469
Hunan	2021	0.3605	0.167	0.3929	0.2638	0.93029	0.495389
Guangdong	2021	0.3545	0.2888	0.5042	0.3217	0.994771	0.565701
Guangxi	2021	0.3486	0.1458	0.37	0.2472	0.911998	0.474811
Hainan	2021	0.3323	0.1635	0.3638	0.2479	0.940259	0.482794
Chongqing	2021	0.3176	0.4123	0.4274	0.365	0.991548	0.601594
Sichuan	2021	0.3171	0.2991	0.4941	0.3081	0.999573	0.554949
Guizhou	2021	0.2969	0.1898	0.3889	0.2434	0.975488	0.487272
Yunnan	2021	0.3112	0.2033	0.3714	0.2573	0.977762	0.501576
Shanxi	2021	0.2529	0.3164	0.3587	0.2847	0.99376	0.531905
Gansu	2021	0.1409	0.4953	0.3313	0.3181	0.830474	0.513978
Qinghai	2021	0.2941	0.2803	0.2862	0.2872	0.999711	0.535833
Ningxia	2021	0.2094	0.2508	0.3141	0.2301	0.995945	0.478714
Xinjiang	2021	0.2469	0.2884	0.3623	0.2677	0.99699	0.516618
Beijing	2022	0.2815	0.1743	0.4821	0.2279	0.971949	0.470646
Tianjin	2022	0.1423	0.203	0.2542	0.1727	0.984428	0.412324
Hebei	2022	0.2138	0.1887	0.4665	0.2013	0.998054	0.448228
Shanxi	2022	0.1905	0.4061	0.3207	0.2983	0.932418	0.52739
Inner Mongolia	2022	0.1746	0.4586	0.3331	0.3166	0.893775	0.531948
Liaoning	2022	0.2293	0.1987	0.3136	0.214	0.997441	0.462009
Jilin	2022	0.2344	0.1531	0.3533	0.1938	0.977743	0.435301
Heilongjiang	2022	0.2504	0.1631	0.344	0.2068	0.977459	0.449598
Shanghai	2022	0.1897	0.1688	0.2754	0.1793	0.998299	0.423078
Jiangsu	2022	0.2661	0.2416	0.468	0.2539	0.998835	0.503591
Zhejiang	2022	0.3471	0.2374	0.4037	0.2923	0.98223	0.535823
Anhui	2022	0.2372	0.1665	0.4678	0.2019	0.984545	0.445847
Fujian	2022	0.3907	0.1923	0.3859	0.2915	0.940314	0.523547
Jiangxi	2022	0.3706	0.123	0.441	0.2468	0.865088	0.462065
Shandong	2022	0.2084	0.2307	0.5156	0.2196	0.99871	0.468313
Henan	2022	0.2069	0.175	0.4734	0.191	0.996505	0.436271
Hubei	2022	0.2772	0.192	0.4216	0.2346	0.983375	0.480312
Hunan	2022	0.3478	0.1614	0.3693	0.2546	0.93059	0.486753
Guangdong	2022	0.4188	0.2731	0.4503	0.346	0.977577	0.581585
Guangxi	2022	0.3901	0.1484	0.3326	0.2693	0.893612	0.490561
Hainan	2022	0.3464	0.1898	0.3614	0.2681	0.956401	0.506371
Chongqing	2022	0.2506	0.1796	0.4427	0.2151	0.986287	0.460598
Sichuan	2022	0.2844	0.2985	0.5203	0.2915	0.999707	0.539828
Guizhou	2022	0.2726	0.1962	0.3912	0.2344	0.986631	0.480902
Yunnan	2022	0.3162	0.2186	0.3905	0.2674	0.983206	0.512747
Shanxi	2022	0.2164	0.3287	0.3622	0.2726	0.978548	0.516481
Gansu	2022	0.1401	0.2187	0.3509	0.1794	0.975711	0.418381
Qinghai	2022	0.2668	0.2602	0.2844	0.2635	0.999922	0.513302
Ningxia	2022	0.2034	0.277	0.3289	0.2402	0.988194	0.4872
Xinjiang	2022	0.2501	0.3325	0.3591	0.2913	0.989948	0.537003

## Sheet: WC
Province	year	water-综合发展指数	energy-综合发展指数	carbon-综合发展指数	WC-T	WC-C	WC-D
Beijing	2008	0.2186	0.1329	0.3239	0.2713	0.980981	0.515888
Tianjin	2008	0.126	0.2034	0.232	0.179	0.95516	0.41349
Hebei	2008	0.1937	0.1179	0.3018	0.2478	0.975912	0.491763
Shanxi	2008	0.1698	0.3524	0.1967	0.1833	0.997303	0.427558
Inner Mongolia	2008	0.166	0.3082	0.2711	0.2186	0.970662	0.460637
Liaoning	2008	0.1876	0.1269	0.2859	0.2368	0.978213	0.481291
Jilin	2008	0.1758	0.1619	0.2741	0.225	0.975839	0.468576
Heilongjiang	2008	0.2152	0.2038	0.2479	0.2316	0.997504	0.480647
Shanghai	2008	0.181	0.1452	0.2475	0.2143	0.987884	0.460113
Jiangsu	2008	0.2475	0.1613	0.3972	0.3224	0.972668	0.559989
Zhejiang	2008	0.3182	0.1561	0.4045	0.3614	0.992845	0.599011
Anhui	2008	0.2299	0.1505	0.2796	0.2548	0.995231	0.503572
Fujian	2008	0.3533	0.1808	0.2769	0.3151	0.992624	0.559264
Jiangxi	2008	0.3246	0.1139	0.2716	0.2981	0.996041	0.544903
Shandong	2008	0.1984	0.1882	0.4254	0.3119	0.931439	0.538995
Henan	2008	0.1988	0.1592	0.2388	0.2188	0.995814	0.46678
Hubei	2008	0.2513	0.2111	0.268	0.2597	0.999483	0.509476
Hunan	2008	0.3136	0.1668	0.2599	0.2868	0.995607	0.534359
Guangdong	2008	0.4063	0.1973	0.3138	0.3601	0.991715	0.597592
Guangxi	2008	0.3685	0.1663	0.2639	0.3162	0.986226	0.558431
Hainan	2008	0.339	0.1684	0.3043	0.3217	0.998544	0.566773
Chongqing	2008	0.2357	0.1739	0.2556	0.2457	0.999179	0.495478
Sichuan	2008	0.2639	0.2418	0.2687	0.2663	0.999959	0.516032
Guizhou	2008	0.2434	0.2148	0.1898	0.2166	0.992316	0.463611
Yunnan	2008	0.3259	0.2151	0.2278	0.2769	0.98418	0.522034
Shanxi	2008	0.1731	0.2566	0.2458	0.2095	0.984825	0.454226
Gansu	2008	0.1275	0.2097	0.1877	0.1576	0.981592	0.393318
Qinghai	2008	0.2354	0.224	0.2165	0.226	0.999125	0.475187
Ningxia	2008	0.2462	0.2567	0.1829	0.2146	0.989059	0.460708
Xinjiang	2008	0.2399	0.236	0.2091	0.2245	0.997644	0.473256
Beijing	2009	0.227	0.1288	0.4163	0.3217	0.955724	0.554488
Tianjin	2009	0.1245	0.1948	0.2392	0.1819	0.948969	0.415473
Hebei	2009	0.1972	0.1012	0.3371	0.2672	0.965112	0.507817
Shanxi	2009	0.1726	0.3081	0.2246	0.1986	0.991393	0.443724
Inner Mongolia	2009	0.1669	0.3225	0.2976	0.2323	0.959597	0.472138
Liaoning	2009	0.1904	0.1227	0.3107	0.2506	0.970755	0.493225
Jilin	2009	0.1795	0.1435	0.2844	0.232	0.974098	0.475385
Heilongjiang	2009	0.2363	0.1892	0.2771	0.2567	0.996837	0.505854
Shanghai	2009	0.1962	0.1578	0.2558	0.226	0.991269	0.473315
Jiangsu	2009	0.2506	0.1512	0.3909	0.3208	0.975791	0.559494
Zhejiang	2009	0.3322	0.1599	0.3095	0.3209	0.999374	0.566303
Anhui	2009	0.2376	0.1382	0.2924	0.265	0.99464	0.5134
Fujian	2009	0.3227	0.156	0.2829	0.3028	0.997838	0.549678
Jiangxi	2009	0.3177	0.0974	0.305	0.3114	0.999792	0.557974
Shandong	2009	0.2016	0.1647	0.45	0.3258	0.924486	0.548815
Henan	2009	0.2073	0.1419	0.2513	0.2293	0.995387	0.477747
Hubei	2009	0.2461	0.2096	0.2882	0.2672	0.996891	0.51611
Hunan	2009	0.3071	0.1507	0.2903	0.2987	0.999605	0.546426
Guangdong	2009	0.3642	0.2069	0.3545	0.3594	0.999909	0.599472
Guangxi	2009	0.3212	0.1668	0.2901	0.3057	0.998705	0.552543
Hainan	2009	0.3705	0.1567	0.3216	0.3461	0.997501	0.587567
Chongqing	2009	0.2364	0.1671	0.3061	0.2713	0.991712	0.518702
Sichuan	2009	0.2681	0.2258	0.2805	0.2743	0.999745	0.52367
Guizhou	2009	0.2331	0.1937	0.1871	0.2101	0.99399	0.456987
Yunnan	2009	0.2917	0.2	0.2708	0.2813	0.999309	0.530194
Shanxi	2009	0.1953	0.2772	0.2765	0.2359	0.985078	0.482058
Gansu	2009	0.1354	0.2307	0.2003	0.1679	0.981134	0.405872
Qinghai	2009	0.3049	0.2609	0.2195	0.2622	0.98665	0.508625
Ningxia	2009	0.2511	0.2696	0.2707	0.2609	0.999294	0.510603
Xinjiang	2009	0.2382	0.2461	0.2628	0.2505	0.998794	0.500198
Beijing	2010	0.2343	0.119	0.4108	0.3226	0.961843	0.557037
Tianjin	2010	0.1388	0.1915	0.2495	0.1942	0.958501	0.431441
Hebei	2010	0.2005	0.0958	0.4197	0.3101	0.935459	0.538596
Shanxi	2010	0.1708	0.2082	0.2559	0.2134	0.979911	0.457289
Inner Mongolia	2010	0.172	0.1783	0.3353	0.2537	0.946774	0.490098
Liaoning	2010	0.2229	0.1173	0.3247	0.2738	0.982568	0.518678
Jilin	2010	0.2208	0.1443	0.3128	0.2668	0.985025	0.512645
Heilongjiang	2010	0.2296	0.1924	0.3032	0.2664	0.990413	0.513659
Shanghai	2010	0.1915	0.1447	0.2282	0.2099	0.996169	0.45727
Jiangsu	2010	0.2498	0.1431	0.4261	0.338	0.965383	0.571226
Zhejiang	2010	0.3895	0.1597	0.3613	0.3754	0.999294	0.612483
Anhui	2010	0.2606	0.1065	0.3101	0.2854	0.996231	0.533221
Fujian	2010	0.431	0.1701	0.3034	0.3672	0.98479	0.601344
Jiangxi	2010	0.422	0.1003	0.3526	0.3873	0.995978	0.621082
Shandong	2010	0.2023	0.1521	0.4699	0.3361	0.917344	0.555265
Henan	2010	0.2061	0.1117	0.257	0.2316	0.993941	0.479788
Hubei	2010	0.281	0.198	0.2836	0.2823	0.999989	0.531316
Hunan	2010	0.3613	0.1474	0.2793	0.3203	0.991774	0.563618
Guangdong	2010	0.4106	0.1992	0.7726	0.5916	0.952048	0.750487
Guangxi	2010	0.3718	0.1554	0.3062	0.339	0.995308	0.58087
Hainan	2010	0.3674	0.1449	0.3396	0.3535	0.999227	0.594329
Chongqing	2010	0.2453	0.1537	0.3577	0.3015	0.982474	0.544257
Sichuan	2010	0.2803	0.2358	0.2859	0.2831	0.999951	0.532058
Guizhou	2010	0.2604	0.1486	0.2124	0.2364	0.994833	0.484952
Yunnan	2010	0.3151	0.1851	0.2837	0.2994	0.998624	0.546798
Shanxi	2010	0.2021	0.2165	0.3072	0.2547	0.978476	0.499217
Gansu	2010	0.1385	0.224	0.2023	0.1704	0.982321	0.40913
Qinghai	2010	0.2651	0.2338	0.2271	0.2461	0.997015	0.495344
Ningxia	2010	0.2511	0.193	0.2772	0.2642	0.998779	0.51369
Xinjiang	2010	0.2587	0.2176	0.2594	0.2591	0.999999	0.509018
Beijing	2011	0.2349	0.1192	0.4036	0.3193	0.964464	0.554936
Tianjin	2011	0.1301	0.1799	0.3019	0.216	0.917522	0.445179
Hebei	2011	0.1996	0.105	0.5048	0.3522	0.901261	0.563404
Shanxi	2011	0.1756	0.1991	0.2747	0.2252	0.975483	0.468699
Inner Mongolia	2011	0.1676	0.1756	0.4135	0.2906	0.906054	0.513127
Liaoning	2011	0.1987	0.115	0.3902	0.2945	0.945651	0.527726
Jilin	2011	0.1875	0.1266	0.3089	0.2482	0.969634	0.490574
Heilongjiang	2011	0.226	0.1823	0.3193	0.2727	0.985254	0.518342
Shanghai	2011	0.1726	0.1404	0.2321	0.2024	0.989133	0.447438
Jiangsu	2011	0.2588	0.157	0.4652	0.362	0.958503	0.589048
Zhejiang	2011	0.3039	0.168	0.3361	0.32	0.998734	0.565327
Anhui	2011	0.2349	0.1082	0.353	0.294	0.979615	0.536663
Fujian	2011	0.3204	0.146	0.3343	0.3274	0.999775	0.572124
Jiangxi	2011	0.3131	0.0948	0.3853	0.3492	0.994642	0.589346
Shandong	2011	0.2068	0.1669	0.5179	0.3624	0.903171	0.572109
Henan	2011	0.2091	0.1193	0.2703	0.2397	0.991818	0.487585
Hubei	2011	0.2492	0.1686	0.3278	0.2885	0.990678	0.534613
Hunan	2011	0.2891	0.1325	0.2832	0.2862	0.999947	0.534962
Guangdong	2011	0.3553	0.2039	0.4067	0.381	0.997722	0.616549
Guangxi	2011	0.3121	0.1486	0.3255	0.3188	0.999779	0.564561
Hainan	2011	0.388	0.1337	0.3509	0.3695	0.998739	0.607482
Chongqing	2011	0.2476	0.1523	0.4329	0.3403	0.962212	0.572225
Sichuan	2011	0.2683	0.2492	0.3108	0.2896	0.997303	0.537419
Guizhou	2011	0.2213	0.1365	0.2349	0.2281	0.999556	0.477492
Yunnan	2011	0.2871	0.189	0.3069	0.297	0.999444	0.544826
Shanxi	2011	0.2171	0.2092	0.303	0.2601	0.986267	0.506486
Gansu	2011	0.1384	0.19	0.2104	0.1744	0.978463	0.413091
Qinghai	2011	0.2666	0.2639	0.2468	0.2567	0.999256	0.506467
Ningxia	2011	0.2511	0.2024	0.2716	0.2614	0.999231	0.511076
Xinjiang	2011	0.2448	0.2113	0.2841	0.2645	0.997236	0.513584
Beijing	2012	0.2351	0.1319	0.4563	0.3457	0.947441	0.572303
Tianjin	2012	0.1429	0.1683	0.3022	0.2226	0.933761	0.455911
Hebei	2012	0.2	0.1046	0.4525	0.3263	0.922091	0.548524
Shanxi	2012	0.1748	0.2024	0.3147	0.2448	0.958289	0.484344
Inner Mongolia	2012	0.1739	0.141	0.4474	0.3107	0.897897	0.528182
Liaoning	2012	0.221	0.1273	0.5047	0.3629	0.920419	0.577945
Jilin	2012	0.2045	0.125	0.3134	0.259	0.977643	0.503199
Heilongjiang	2012	0.242	0.1683	0.3477	0.2949	0.983805	0.538632
Shanghai	2012	0.2042	0.1497	0.232	0.2181	0.997967	0.466537
Jiangsu	2012	0.2484	0.1733	0.4982	0.3733	0.942366	0.593115
Zhejiang	2012	0.3962	0.1775	0.3986	0.3974	0.999995	0.630395
Anhui	2012	0.2416	0.1197	0.3724	0.307	0.977046	0.54768
Fujian	2012	0.4236	0.178	0.3497	0.3867	0.995423	0.620427
Jiangxi	2012	0.418	0.0972	0.4173	0.4177	1	0.646297
Shandong	2012	0.1973	0.1694	0.5692	0.3833	0.874407	0.57893
Henan	2012	0.1975	0.1252	0.2937	0.2456	0.980634	0.490758
Hubei	2012	0.256	0.1772	0.3417	0.2989	0.989667	0.543886
Hunan	2012	0.3641	0.1481	0.307	0.3356	0.996374	0.578259
Guangdong	2012	0.4084	0.2108	0.3993	0.4039	0.999937	0.635511
Guangxi	2012	0.3916	0.1542	0.3431	0.3674	0.997819	0.605474
Hainan	2012	0.337	0.1373	0.3507	0.3439	0.999802	0.586372
Chongqing	2012	0.247	0.1735	0.4191	0.3331	0.966046	0.567265
Sichuan	2012	0.2969	0.2424	0.3286	0.3128	0.998715	0.558926
Guizhou	2012	0.2601	0.1337	0.2616	0.2609	0.999996	0.510783
Yunnan	2012	0.2957	0.2016	0.3155	0.3056	0.999475	0.552666
Shanxi	2012	0.1987	0.208	0.3195	0.2591	0.972449	0.501958
Gansu	2012	0.1382	0.188	0.2504	0.1943	0.957411	0.431306
Qinghai	2012	0.2977	0.2806	0.2546	0.2762	0.99695	0.524745
Ningxia	2012	0.2196	0.1754	0.2787	0.2492	0.992942	0.497434
Xinjiang	2012	0.2614	0.2321	0.3329	0.2972	0.992736	0.543177
Beijing	2013	0.2365	0.1428	0.5004	0.3685	0.933675	0.586566
Tianjin	2013	0.1282	0.1688	0.3199	0.2241	0.90387	0.450064
Hebei	2013	0.2007	0.1314	0.4564	0.3286	0.921181	0.550182
Shanxi	2013	0.1782	0.2093	0.3309	0.2546	0.953958	0.492826
Inner Mongolia	2013	0.1814	0.1932	0.4792	0.3303	0.892624	0.542986
Liaoning	2013	0.2162	0.149	0.3928	0.3045	0.957032	0.53983
Jilin	2013	0.2186	0.1467	0.3151	0.2669	0.983517	0.512348
Heilongjiang	2013	0.2748	0.1694	0.3805	0.3277	0.986905	0.568691
Shanghai	2013	0.1758	0.1489	0.2547	0.2153	0.983062	0.460058
Jiangsu	2013	0.2509	0.1955	0.5816	0.4163	0.917716	0.618098
Zhejiang	2013	0.3338	0.2019	0.4063	0.3701	0.99519	0.606894
Anhui	2013	0.2374	0.1437	0.4412	0.3393	0.953837	0.568891
Fujian	2013	0.384	0.1959	0.3785	0.3813	0.999974	0.617487
Jiangxi	2013	0.346	0.1103	0.3882	0.3671	0.998347	0.605387
Shandong	2013	0.1962	0.1902	0.6139	0.4051	0.85682	0.58915
Henan	2013	0.2043	0.152	0.3303	0.2673	0.971828	0.509676
Hubei	2013	0.2683	0.1815	0.3355	0.3019	0.993787	0.547745
Hunan	2013	0.3329	0.147	0.3273	0.3301	0.999964	0.574533
Guangdong	2013	0.4223	0.2169	0.4354	0.4289	0.999883	0.654866
Guangxi	2013	0.3909	0.1521	0.3582	0.3746	0.999047	0.611754
Hainan	2013	0.3967	0.1363	0.3571	0.3769	0.998619	0.613498
Chongqing	2013	0.2498	0.1676	0.4085	0.3292	0.970506	0.565235
Sichuan	2013	0.2832	0.2475	0.352	0.3176	0.994117	0.5619
Guizhou	2013	0.2521	0.1286	0.3024	0.2773	0.995877	0.525506
Yunnan	2013	0.2969	0.2118	0.3366	0.3168	0.998034	0.562296
Shanxi	2013	0.2017	0.2332	0.335	0.2684	0.968665	0.509892
Gansu	2013	0.1405	0.2037	0.3011	0.2208	0.931525	0.45352
Qinghai	2013	0.2386	0.2824	0.2541	0.2464	0.999505	0.496264
Ningxia	2013	0.2203	0.1827	0.3059	0.2631	0.98668	0.509505
Xinjiang	2013	0.2621	0.2713	0.3605	0.3113	0.987432	0.554425
Beijing	2014	0.2344	0.1592	0.6014	0.4179	0.898438	0.612746
Tianjin	2014	0.1214	0.1741	0.3393	0.2304	0.881075	0.450555
Hebei	2014	0.1964	0.1697	0.4515	0.324	0.919225	0.545737
Shanxi	2014	0.1847	0.3512	0.3248	0.2548	0.961451	0.494952
Inner Mongolia	2014	0.17	0.4429	0.5307	0.3504	0.857328	0.548095
Liaoning	2014	0.1968	0.165	0.3758	0.2863	0.949882	0.521489
Jilin	2014	0.1916	0.1501	0.3295	0.2606	0.964349	0.501308
Heilongjiang	2014	0.2503	0.1812	0.3473	0.2988	0.986739	0.542989
Shanghai	2014	0.2165	0.1582	0.2808	0.2487	0.991606	0.496601
Jiangsu	2014	0.271	0.1906	0.5896	0.4303	0.928949	0.63224
Zhejiang	2014	0.3674	0.2172	0.4417	0.4046	0.995775	0.634737
Anhui	2014	0.256	0.145	0.4285	0.3423	0.967725	0.575545
Fujian	2014	0.3863	0.2069	0.3496	0.368	0.998756	0.606252
Jiangxi	2014	0.3728	0.1156	0.3869	0.3799	0.999828	0.616307
Shandong	2014	0.1967	0.2586	0.6126	0.4047	0.85785	0.589213
Henan	2014	0.2017	0.1673	0.342	0.2719	0.966132	0.512534
Hubei	2014	0.285	0.1897	0.3611	0.3231	0.993039	0.566437
Hunan	2014	0.3615	0.1547	0.335	0.3483	0.999276	0.589956
Guangdong	2014	0.3764	0.224	0.4225	0.3995	0.998334	0.631533
Guangxi	2014	0.3798	0.163	0.3551	0.3675	0.999435	0.606047
Hainan	2014	0.3477	0.1383	0.3587	0.3532	0.999879	0.59427
Chongqing	2014	0.2895	0.1849	0.392	0.3408	0.988625	0.580451
Sichuan	2014	0.287	0.2748	0.3721	0.3296	0.99163	0.5717
Guizhou	2014	0.2955	0.1872	0.3361	0.3158	0.997932	0.561379
Yunnan	2014	0.2964	0.2235	0.3298	0.3131	0.998577	0.559155
Shanxi	2014	0.2042	0.3294	0.3691	0.2867	0.957741	0.524008
Gansu	2014	0.1403	0.1998	0.3001	0.2202	0.931847	0.452982
Qinghai	2014	0.2741	0.2817	0.2689	0.2715	0.999954	0.521045
Ningxia	2014	0.2343	0.2726	0.3161	0.2752	0.988895	0.521674
Xinjiang	2014	0.2473	0.3178	0.3937	0.3205	0.973569	0.558595
Beijing	2015	0.2443	0.1668	0.5346	0.3895	0.92795	0.601196
Tianjin	2015	0.129	0.1878	0.3014	0.2152	0.916272	0.444051
Hebei	2015	0.2026	0.1568	0.4307	0.3167	0.932884	0.543548
Shanxi	2015	0.1841	0.3487	0.3546	0.2694	0.948592	0.50552
Inner Mongolia	2015	0.1698	0.3776	0.5245	0.3472	0.859655	0.546326
Liaoning	2015	0.1989	0.14	0.3907	0.2948	0.945609	0.527983
Jilin	2015	0.1977	0.1395	0.3438	0.2708	0.962915	0.510644
Heilongjiang	2015	0.2461	0.1687	0.3483	0.2972	0.985108	0.541086
Shanghai	2015	0.247	0.1605	0.2768	0.2619	0.99838	0.511347
Jiangsu	2015	0.2871	0.217	0.62	0.4536	0.930223	0.649576
Zhejiang	2015	0.405	0.2156	0.4337	0.4194	0.999414	0.647421
Anhui	2015	0.2705	0.1479	0.4399	0.3552	0.971153	0.587327
Fujian	2015	0.4139	0.2073	0.3696	0.3918	0.9984	0.625438
Jiangxi	2015	0.4141	0.1206	0.3889	0.4015	0.999507	0.633484
Shandong	2015	0.198	0.2194	0.5686	0.3833	0.875381	0.579253
Henan	2015	0.2072	0.1541	0.3447	0.276	0.968468	0.517008
Hubei	2015	0.2942	0.176	0.3378	0.316	0.997618	0.561469
Hunan	2015	0.3712	0.1616	0.4534	0.4123	0.995019	0.640505
Guangdong	2015	0.4018	0.2269	0.4319	0.4169	0.999348	0.645467
Guangxi	2015	0.4204	0.1785	0.3776	0.399	0.998561	0.63121
Hainan	2015	0.2703	0.1381	0.3475	0.3089	0.992162	0.553605
Chongqing	2015	0.2588	0.188	0.385	0.3219	0.980599	0.561832
Sichuan	2015	0.2838	0.2799	0.3621	0.323	0.992625	0.566231
Guizhou	2015	0.2956	0.1828	0.3383	0.317	0.997729	0.562388
Yunnan	2015	0.3082	0.2332	0.3243	0.3163	0.999676	0.562314
Shanxi	2015	0.2021	0.3253	0.3611	0.2816	0.959322	0.519755
Gansu	2015	0.1419	0.178	0.2935	0.2177	0.937426	0.451749
Qinghai	2015	0.227	0.2857	0.2624	0.2447	0.997381	0.494023
Ningxia	2015	0.2443	0.2631	0.328	0.2862	0.989247	0.532093
Xinjiang	2015	0.2572	0.3057	0.3692	0.3132	0.983886	0.555115
Beijing	2016	0.2477	0.1742	0.6284	0.4381	0.900653	0.628153
Tianjin	2016	0.136	0.1746	0.2883	0.2122	0.933359	0.445038
Hebei	2016	0.1973	0.1384	0.4325	0.3149	0.92765	0.540478
Shanxi	2016	0.1833	0.2988	0.4346	0.309	0.913562	0.53131
Inner Mongolia	2016	0.1778	0.3678	0.5006	0.3392	0.87954	0.546205
Liaoning	2016	0.2111	0.151	0.323	0.2671	0.977806	0.51105
Jilin	2016	0.216	0.1318	0.3382	0.2771	0.975387	0.519884
Heilongjiang	2016	0.2507	0.1426	0.3546	0.3027	0.985158	0.546084
Shanghai	2016	0.2466	0.1872	0.2836	0.2651	0.997562	0.514251
Jiangsu	2016	0.3103	0.2248	0.5622	0.4363	0.957416	0.646313
Zhejiang	2016	0.3915	0.2177	0.5123	0.4519	0.991028	0.669212
Anhui	2016	0.3018	0.1638	0.4716	0.3867	0.975601	0.614219
Fujian	2016	0.5083	0.2066	0.3615	0.4349	0.985655	0.654722
Jiangxi	2016	0.4295	0.1104	0.4205	0.425	0.999944	0.651902
Shandong	2016	0.2046	0.2572	0.6076	0.4061	0.868218	0.593787
Henan	2016	0.2139	0.1785	0.379	0.2965	0.960447	0.533641
Hubei	2016	0.3254	0.1966	0.4168	0.3711	0.992388	0.606857
Hunan	2016	0.39	0.1519	0.3505	0.3703	0.998576	0.608089
Guangdong	2016	0.4445	0.2205	0.471	0.4578	0.999581	0.676467
Guangxi	2016	0.4004	0.163	0.3615	0.381	0.998696	0.616849
Hainan	2016	0.399	0.1539	0.352	0.3755	0.99804	0.61218
Chongqing	2016	0.2814	0.1715	0.3917	0.3366	0.986482	0.576238
Sichuan	2016	0.2874	0.281	0.4026	0.345	0.985964	0.58323
Guizhou	2016	0.2856	0.1619	0.3558	0.3207	0.993993	0.5646
Yunnan	2016	0.3199	0.2049	0.3401	0.33	0.999532	0.574322
Shanxi	2016	0.1993	0.3037	0.3878	0.2936	0.947056	0.52731
Gansu	2016	0.1456	0.1692	0.3189	0.2323	0.927795	0.464249
Qinghai	2016	0.2382	0.2539	0.2747	0.2565	0.997465	0.505816
Ningxia	2016	0.2166	0.2371	0.3464	0.2815	0.97306	0.52337
Xinjiang	2016	0.2632	0.2667	0.3951	0.3292	0.979721	0.567912
Beijing	2017	0.2422	0.191	0.6274	0.4348	0.89654	0.624352
Tianjin	2017	0.1343	0.1769	0.3281	0.2312	0.907932	0.458164
Hebei	2017	0.2045	0.1527	0.5116	0.3581	0.903375	0.568769
Shanxi	2017	0.1828	0.3352	0.3453	0.2641	0.951481	0.501285
Inner Mongolia	2017	0.1763	0.3778	0.4728	0.3246	0.889576	0.537361
Liaoning	2017	0.1978	0.1636	0.358	0.2779	0.95756	0.515855
Jilin	2017	0.2	0.1264	0.322	0.261	0.972305	0.503757
Heilongjiang	2017	0.2432	0.1381	0.3407	0.292	0.98596	0.536563
Shanghai	2017	0.1953	0.1832	0.2715	0.2334	0.986587	0.479864
Jiangsu	2017	0.27	0.2269	0.5461	0.4081	0.941032	0.619706
Zhejiang	2017	0.3395	0.2034	0.445	0.3923	0.990916	0.623487
Anhui	2017	0.2629	0.1592	0.4799	0.3714	0.956376	0.595985
Fujian	2017	0.3686	0.1898	0.3866	0.3776	0.999716	0.614404
Jiangxi	2017	0.37	0.1086	0.43	0.4	0.997184	0.631564
Shandong	2017	0.1966	0.2598	0.6663	0.4315	0.838873	0.601642
Henan	2017	0.2159	0.1738	0.4947	0.3553	0.919818	0.571674
Hubei	2017	0.3107	0.1854	0.4098	0.3603	0.990496	0.597391
Hunan	2017	0.3631	0.146	0.3566	0.3599	0.999959	0.599904
Guangdong	2017	0.3829	0.2385	0.4802	0.4316	0.993625	0.654865
Guangxi	2017	0.4074	0.1563	0.3625	0.385	0.998298	0.619955
Hainan	2017	0.349	0.1587	0.3614	0.3552	0.999848	0.595941
Chongqing	2017	0.2853	0.1736	0.4214	0.3534	0.98128	0.588884
Sichuan	2017	0.2908	0.2831	0.413	0.3519	0.984811	0.588689
Guizhou	2017	0.2828	0.1581	0.3962	0.3395	0.985955	0.57856
Yunnan	2017	0.3302	0.1933	0.3465	0.3384	0.99971	0.581637
Shanxi	2017	0.2121	0.3034	0.3895	0.3008	0.955534	0.53612
Gansu	2017	0.1449	0.172	0.324	0.2345	0.92418	0.465532
Qinghai	2017	0.2777	0.2336	0.274	0.2759	0.999978	0.525256
Ningxia	2017	0.2095	0.2122	0.3354	0.2725	0.972942	0.514904
Xinjiang	2017	0.2564	0.2494	0.4329	0.3447	0.966662	0.577242
Beijing	2018	0.2652	0.1837	0.5874	0.4263	0.925845	0.628242
Tianjin	2018	0.1541	0.1902	0.2666	0.2104	0.963582	0.450264
Hebei	2018	0.2064	0.1725	0.3873	0.2969	0.952449	0.531772
Shanxi	2018	0.1858	0.353	0.3126	0.2492	0.967095	0.490918
Inner Mongolia	2018	0.1821	0.398	0.362	0.2721	0.943758	0.506751
Liaoning	2018	0.1972	0.1685	0.3117	0.2545	0.97436	0.49797
Jilin	2018	0.2119	0.1295	0.3408	0.2764	0.972424	0.518438
Heilongjiang	2018	0.2583	0.1427	0.3281	0.2932	0.99289	0.539551
Shanghai	2018	0.2057	0.1861	0.2738	0.2398	0.989863	0.487206
Jiangsu	2018	0.2742	0.2432	0.4498	0.362	0.970141	0.592614
Zhejiang	2018	0.3343	0.2164	0.4026	0.3685	0.995695	0.605734
Anhui	2018	0.2634	0.161	0.4274	0.3454	0.971411	0.579245
Fujian	2018	0.3392	0.1845	0.3918	0.3655	0.997408	0.603782
Jiangxi	2018	0.3319	0.1104	0.4325	0.3822	0.991302	0.615529
Shandong	2018	0.2037	0.2685	0.5187	0.3612	0.899924	0.570134
Henan	2018	0.219	0.1814	0.4334	0.3262	0.944458	0.555051
Hubei	2018	0.2871	0.1893	0.3533	0.3202	0.994643	0.564344
Hunan	2018	0.3305	0.1448	0.3319	0.3312	0.999998	0.575499
Guangdong	2018	0.397	0.2415	0.4244	0.4107	0.999443	0.64068
Guangxi	2018	0.3776	0.1525	0.3505	0.3641	0.999307	0.603198
Hainan	2018	0.3777	0.1691	0.3387	0.3582	0.998517	0.598054
Chongqing	2018	0.2772	0.1687	0.4068	0.342	0.981886	0.579487
Sichuan	2018	0.3135	0.2904	0.428	0.3708	0.988006	0.605271
Guizhou	2018	0.2885	0.1622	0.3609	0.3247	0.993766	0.568046
Yunnan	2018	0.3391	0.2004	0.3404	0.3398	0.999998	0.582923
Shanxi	2018	0.2084	0.312	0.3171	0.2628	0.978373	0.507066
Gansu	2018	0.1487	0.1713	0.316	0.2324	0.932946	0.465636
Qinghai	2018	0.3187	0.2558	0.2722	0.2955	0.996899	0.542756
Ningxia	2018	0.1714	0.2014	0.3304	0.2509	0.948473	0.487823
Xinjiang	2018	0.2491	0.2716	0.3456	0.2974	0.986747	0.541718
Beijing	2019	0.2706	0.1659	0.5975	0.4341	0.926388	0.634149
Tianjin	2019	0.1456	0.1961	0.2574	0.2015	0.960749	0.43999
Hebei	2019	0.2098	0.1826	0.4048	0.3073	0.948332	0.539836
Shanxi	2019	0.1848	0.3596	0.3288	0.2568	0.959891	0.496488
Inner Mongolia	2019	0.1772	0.4102	0.3474	0.2623	0.945907	0.498108
Liaoning	2019	0.2064	0.1766	0.2944	0.2504	0.98444	0.496492
Jilin	2019	0.2137	0.1295	0.3154	0.2646	0.981353	0.509574
Heilongjiang	2019	0.2762	0.1361	0.3069	0.2916	0.998613	0.539625
Shanghai	2019	0.2266	0.173	0.2705	0.2486	0.996093	0.497623
Jiangsu	2019	0.2559	0.2596	0.4416	0.3488	0.963908	0.579837
Zhejiang	2019	0.3867	0.2235	0.3998	0.3933	0.999861	0.627093
Anhui	2019	0.2289	0.1571	0.4384	0.3337	0.949439	0.562875
Fujian	2019	0.4058	0.1874	0.3923	0.3991	0.999857	0.631698
Jiangxi	2019	0.407	0.1235	0.4498	0.4284	0.998752	0.654114
Shandong	2019	0.1969	0.2674	0.4811	0.339	0.907906	0.554779
Henan	2019	0.2112	0.1741	0.4692	0.3402	0.925319	0.561065
Hubei	2019	0.2687	0.183	0.3814	0.3251	0.984859	0.565842
Hunan	2019	0.377	0.1434	0.3382	0.3576	0.998527	0.597556
Guangdong	2019	0.4097	0.2404	0.4663	0.438	0.99791	0.661124
Guangxi	2019	0.4	0.1475	0.3568	0.3784	0.998369	0.614641
Hainan	2019	0.2997	0.1829	0.3421	0.3209	0.997815	0.565861
Chongqing	2019	0.2717	0.1683	0.4093	0.3405	0.979374	0.577475
Sichuan	2019	0.3058	0.2975	0.4479	0.3769	0.982066	0.608392
Guizhou	2019	0.301	0.1671	0.3738	0.3374	0.994164	0.579164
Yunnan	2019	0.2962	0.2142	0.354	0.3251	0.996041	0.569046
Shanxi	2019	0.2155	0.3243	0.2745	0.245	0.992724	0.493171
Gansu	2019	0.1458	0.1912	0.3242	0.235	0.925161	0.466276
Qinghai	2019	0.3104	0.2891	0.2725	0.2915	0.997884	0.539336
Ningxia	2019	0.1892	0.2206	0.3197	0.2545	0.966561	0.495974
Xinjiang	2019	0.2583	0.276	0.3563	0.3073	0.987205	0.550789
Beijing	2020	0.2551	0.1565	0.5156	0.3854	0.941145	0.60226
Tianjin	2020	0.1419	0.1911	0.2686	0.2053	0.951176	0.441901
Hebei	2020	0.2182	0.1594	0.4596	0.3389	0.934428	0.562741
Shanxi	2020	0.1866	0.3675	0.3326	0.2596	0.959649	0.499124
Inner Mongolia	2020	0.1808	0.3914	0.3522	0.2665	0.946884	0.502339
Liaoning	2020	0.2107	0.1668	0.326	0.2684	0.976651	0.511989
Jilin	2020	0.228	0.1338	0.3266	0.2773	0.984069	0.522381
Heilongjiang	2020	0.2809	0.1395	0.3349	0.3079	0.996148	0.553818
Shanghai	2020	0.2487	0.1527	0.2589	0.2538	0.999798	0.503735
Jiangsu	2020	0.2922	0.2558	0.4854	0.3888	0.968643	0.613684
Zhejiang	2020	0.3576	0.2365	0.4361	0.3969	0.995097	0.628454
Anhui	2020	0.307	0.1611	0.4342	0.3706	0.985164	0.604237
Fujian	2020	0.3356	0.1795	0.4184	0.377	0.993952	0.612144
Jiangxi	2020	0.3808	0.1124	0.4375	0.4092	0.997597	0.638918
Shandong	2020	0.2099	0.2358	0.5151	0.3625	0.907077	0.573424
Henan	2020	0.2189	0.1647	0.5017	0.3603	0.919773	0.575668
Hubei	2020	0.352	0.1939	0.381	0.3665	0.999217	0.605155
Hunan	2020	0.3883	0.1552	0.3722	0.3803	0.999776	0.616616
Guangdong	2020	0.3706	0.2403	0.5247	0.4477	0.985076	0.664092
Guangxi	2020	0.389	0.1501	0.4084	0.3987	0.999704	0.631333
Hainan	2020	0.3055	0.1713	0.3483	0.3269	0.997855	0.571138
Chongqing	2020	0.3266	0.18	0.4277	0.3772	0.990977	0.611389
Sichuan	2020	0.326	0.2966	0.4732	0.3996	0.982892	0.626708
Guizhou	2020	0.3201	0.1847	0.3844	0.3523	0.995826	0.592309
Yunnan	2020	0.3205	0.2065	0.3567	0.3386	0.99857	0.581477
Shanxi	2020	0.2206	0.3243	0.3636	0.2921	0.969579	0.532179
Gansu	2020	0.1467	0.186	0.3403	0.2435	0.917587	0.472686
Qinghai	2020	0.3344	0.2791	0.2878	0.3111	0.997191	0.55698
Ningxia	2020	0.2008	0.2359	0.3367	0.2688	0.967509	0.509967
Xinjiang	2020	0.2521	0.2804	0.3672	0.3097	0.982577	0.551638
Beijing	2021	0.2881	0.16	0.478	0.3831	0.968791	0.609216
Tianjin	2021	0.1598	0.2143	0.2487	0.2043	0.976032	0.446546
Hebei	2021	0.2158	0.2677	0.4316	0.3237	0.942809	0.552438
Shanxi	2021	0.1885	0.3487	0.301	0.2448	0.973232	0.488106
Inner Mongolia	2021	0.1908	0.2155	0.3376	0.2642	0.960633	0.503785
Liaoning	2021	0.23	0.1933	0.3249	0.2775	0.985267	0.522888
Jilin	2021	0.2182	0.1441	0.3328	0.2755	0.978132	0.51911
Heilongjiang	2021	0.2717	0.1559	0.3438	0.3078	0.993115	0.552884
Shanghai	2021	0.2396	0.1568	0.2657	0.2527	0.998665	0.502357
Jiangsu	2021	0.2828	0.2355	0.4507	0.3668	0.973449	0.597546
Zhejiang	2021	0.3994	0.2333	0.4243	0.4119	0.999543	0.641648
Anhui	2021	0.2685	0.4753	0.4219	0.3452	0.975003	0.580148
Fujian	2021	0.3399	0.2349	0.3938	0.3669	0.997298	0.604904
Jiangxi	2021	0.3563	0.1498	0.4613	0.4088	0.991719	0.636722
Shandong	2021	0.2204	0.2285	0.5056	0.363	0.919608	0.57777
Henan	2021	0.2394	0.2274	0.5191	0.3793	0.929527	0.593776
Hubei	2021	0.3135	0.2376	0.417	0.3653	0.989912	0.601344
Hunan	2021	0.3605	0.167	0.3929	0.3767	0.999075	0.613475
Guangdong	2021	0.3545	0.2888	0.5042	0.4294	0.984687	0.65025
Guangxi	2021	0.3486	0.1458	0.37	0.3593	0.999556	0.599283
Hainan	2021	0.3323	0.1635	0.3638	0.3481	0.998976	0.589698
Chongqing	2021	0.3176	0.4123	0.4274	0.3725	0.98908	0.606986
Sichuan	2021	0.3171	0.2991	0.4941	0.4056	0.975905	0.629148
Guizhou	2021	0.2969	0.1898	0.3889	0.3429	0.990961	0.582924
Yunnan	2021	0.3112	0.2033	0.3714	0.3413	0.996103	0.58307
Shanxi	2021	0.2529	0.3164	0.3587	0.3058	0.984924	0.548808
Gansu	2021	0.1409	0.4953	0.3313	0.2361	0.915104	0.464818
Qinghai	2021	0.2941	0.2803	0.2862	0.2902	0.999907	0.538677
Ningxia	2021	0.2094	0.2508	0.3141	0.2618	0.979796	0.506469
Xinjiang	2021	0.2469	0.2884	0.3623	0.3046	0.981894	0.546887
Beijing	2022	0.2815	0.1743	0.4821	0.3818	0.964877	0.606951
Tianjin	2022	0.1423	0.203	0.2542	0.1983	0.95935	0.436164
Hebei	2022	0.2138	0.1887	0.4665	0.3402	0.928451	0.562014
Shanxi	2022	0.1905	0.4061	0.3207	0.2556	0.967021	0.497163
Inner Mongolia	2022	0.1746	0.4586	0.3331	0.2539	0.950019	0.491131
Liaoning	2022	0.2293	0.1987	0.3136	0.2715	0.987871	0.517887
Jilin	2022	0.2344	0.1531	0.3533	0.2939	0.979321	0.536491
Heilongjiang	2022	0.2504	0.1631	0.344	0.2972	0.987524	0.541749
Shanghai	2022	0.1897	0.1688	0.2754	0.2326	0.982877	0.478139
Jiangsu	2022	0.2661	0.2416	0.468	0.3671	0.961435	0.59409
Zhejiang	2022	0.3471	0.2374	0.4037	0.3754	0.997154	0.611827
Anhui	2022	0.2372	0.1665	0.4678	0.3525	0.944992	0.577157
Fujian	2022	0.3907	0.1923	0.3859	0.3883	0.999981	0.623131
Jiangxi	2022	0.3706	0.123	0.441	0.4058	0.996231	0.635823
Shandong	2022	0.2084	0.2307	0.5156	0.362	0.905517	0.572536
Henan	2022	0.2069	0.175	0.4734	0.3402	0.920076	0.559473
Hubei	2022	0.2772	0.192	0.4216	0.3494	0.978417	0.584687
Hunan	2022	0.3478	0.1614	0.3693	0.3586	0.99955	0.598698
Guangdong	2022	0.4188	0.2731	0.4503	0.4346	0.999343	0.659025
Guangxi	2022	0.3901	0.1484	0.3326	0.3614	0.99683	0.600212
Hainan	2022	0.3464	0.1898	0.3614	0.3539	0.999775	0.594828
Chongqing	2022	0.2506	0.1796	0.4427	0.3467	0.960847	0.57717
Sichuan	2022	0.2844	0.2985	0.5203	0.4024	0.956066	0.620259
Guizhou	2022	0.2726	0.1962	0.3912	0.3319	0.983909	0.571454
Yunnan	2022	0.3162	0.2186	0.3905	0.3534	0.994458	0.592825
Shanxi	2022	0.2164	0.3287	0.3622	0.2893	0.96773	0.529117
Gansu	2022	0.1401	0.2187	0.3509	0.2455	0.903149	0.470875
Qinghai	2022	0.2668	0.2602	0.2844	0.2756	0.99949	0.524842
Ningxia	2022	0.2034	0.277	0.3289	0.2662	0.971809	0.508621
Xinjiang	2022	0.2501	0.3325	0.3591	0.3046	0.983863	0.547435

## Sheet: EC
Province	year	water-综合发展指数	energy-综合发展指数	carbon-综合发展指数	EC-T	EC-C	EC-D
Beijing	2008	0.2186	0.1329	0.3239	0.1744	0.908389	0.398024
Tianjin	2008	0.126	0.2034	0.232	0.179	0.99784	0.422627
Hebei	2008	0.1937	0.1179	0.3018	0.1596	0.898892	0.378765
Shanxi	2008	0.1698	0.3524	0.1967	0.2418	0.958956	0.481535
Inner Mongolia	2008	0.166	0.3082	0.2711	0.2445	0.997947	0.493962
Liaoning	2008	0.1876	0.1269	0.2859	0.1588	0.922844	0.382815
Jilin	2008	0.1758	0.1619	0.2741	0.1723	0.966321	0.408041
Heilongjiang	2008	0.2152	0.2038	0.2479	0.1845	0.995223	0.428507
Shanghai	2008	0.181	0.1452	0.2475	0.1551	0.965473	0.386969
Jiangsu	2008	0.2475	0.1613	0.3972	0.2131	0.906418	0.439497
Zhejiang	2008	0.3182	0.1561	0.4045	0.2129	0.896474	0.436874
Anhui	2008	0.2299	0.1505	0.2796	0.1685	0.953888	0.400912
Fujian	2008	0.3533	0.1808	0.2769	0.1827	0.977709	0.422643
Jiangxi	2008	0.3246	0.1139	0.2716	0.1475	0.912499	0.36687
Shandong	2008	0.1984	0.1882	0.4254	0.2359	0.92226	0.466434
Henan	2008	0.1988	0.1592	0.2388	0.1592	0.979796	0.394947
Hubei	2008	0.2513	0.2111	0.268	0.1949	0.992922	0.43991
Hunan	2008	0.3136	0.1668	0.2599	0.17	0.975907	0.407313
Guangdong	2008	0.4063	0.1973	0.3138	0.2033	0.973675	0.444914
Guangxi	2008	0.3685	0.1663	0.2639	0.1711	0.973925	0.408214
Hainan	2008	0.339	0.1684	0.3043	0.1856	0.957781	0.421621
Chongqing	2008	0.2357	0.1739	0.2556	0.1722	0.981741	0.411164
Sichuan	2008	0.2639	0.2418	0.2687	0.2105	0.998611	0.458484
Guizhou	2008	0.2434	0.2148	0.1898	0.1707	0.998089	0.412764
Yunnan	2008	0.3259	0.2151	0.2278	0.1835	0.999589	0.428281
Shanxi	2008	0.1731	0.2566	0.2458	0.2102	0.999769	0.458423
Gansu	2008	0.1275	0.2097	0.1877	0.1674	0.998466	0.408832
Qinghai	2008	0.2354	0.224	0.2165	0.1842	0.999855	0.429154
Ningxia	2008	0.2462	0.2567	0.1829	0.1893	0.985807	0.431988
Xinjiang	2008	0.2399	0.236	0.2091	0.1877	0.998172	0.432847
Beijing	2009	0.227	0.1288	0.4163	0.2032	0.849601	0.415498
Tianjin	2009	0.1245	0.1948	0.2392	0.1771	0.994753	0.419727
Hebei	2009	0.1972	0.1012	0.3371	0.163	0.842807	0.370645
Shanxi	2009	0.1726	0.3081	0.2246	0.2289	0.987639	0.475469
Inner Mongolia	2009	0.1669	0.3225	0.2976	0.2605	0.999193	0.510186
Liaoning	2009	0.1904	0.1227	0.3107	0.1649	0.901019	0.385458
Jilin	2009	0.1795	0.1435	0.2844	0.1666	0.944231	0.396622
Heilongjiang	2009	0.2363	0.1892	0.2771	0.187	0.982072	0.428541
Shanghai	2009	0.1962	0.1578	0.2558	0.1642	0.971523	0.399405
Jiangsu	2009	0.2506	0.1512	0.3909	0.2059	0.896932	0.429742
Zhejiang	2009	0.3322	0.1599	0.3095	0.1831	0.947854	0.416596
Anhui	2009	0.2376	0.1382	0.2924	0.1666	0.933681	0.3944
Fujian	2009	0.3227	0.156	0.2829	0.1723	0.957289	0.406129
Jiangxi	2009	0.3177	0.0974	0.305	0.1504	0.856646	0.358942
Shandong	2009	0.2016	0.1647	0.45	0.2324	0.885768	0.45371
Henan	2009	0.2073	0.1419	0.2513	0.1547	0.960515	0.385476
Hubei	2009	0.2461	0.2096	0.2882	0.2009	0.987456	0.445399
Hunan	2009	0.3071	0.1507	0.2903	0.1721	0.948575	0.404042
Guangdong	2009	0.3642	0.2069	0.3545	0.2216	0.964819	0.462389
Guangxi	2009	0.3212	0.1668	0.2901	0.1801	0.962899	0.416435
Hainan	2009	0.3705	0.1567	0.3216	0.1856	0.93869	0.417398
Chongqing	2009	0.2364	0.1671	0.3061	0.1856	0.955884	0.421203
Sichuan	2009	0.2681	0.2258	0.2805	0.2064	0.994147	0.452981
Guizhou	2009	0.2331	0.1937	0.1871	0.1592	0.99985	0.398969
Yunnan	2009	0.2917	0.2	0.2708	0.1903	0.988628	0.433746
Shanxi	2009	0.1953	0.2772	0.2765	0.2308	0.999999	0.480416
Gansu	2009	0.1354	0.2307	0.2003	0.1821	0.997509	0.4262
Qinghai	2009	0.3049	0.2609	0.2195	0.2036	0.99628	0.45038
Ningxia	2009	0.2511	0.2696	0.2707	0.225	0.999998	0.474341
Xinjiang	2009	0.2382	0.2461	0.2628	0.2107	0.999461	0.458897
Beijing	2010	0.2343	0.119	0.4108	0.1964	0.834655	0.404878
Tianjin	2010	0.1388	0.1915	0.2495	0.1789	0.991314	0.421125
Hebei	2010	0.2005	0.0958	0.4197	0.1878	0.777953	0.38223
Shanxi	2010	0.1708	0.2082	0.2559	0.1894	0.994704	0.434047
Inner Mongolia	2010	0.172	0.1783	0.3353	0.2009	0.952133	0.43736
Liaoning	2010	0.2229	0.1173	0.3247	0.1669	0.883076	0.383908
Jilin	2010	0.2208	0.1443	0.3128	0.1764	0.929577	0.404941
Heilongjiang	2010	0.2296	0.1924	0.3032	0.1973	0.974688	0.438527
Shanghai	2010	0.1915	0.1447	0.2282	0.1484	0.974607	0.380305
Jiangsu	2010	0.2498	0.1431	0.4261	0.2136	0.867642	0.430498
Zhejiang	2010	0.3895	0.1597	0.3613	0.2003	0.922101	0.429764
Anhui	2010	0.2606	0.1065	0.3101	0.1566	0.872442	0.369627
Fujian	2010	0.431	0.1701	0.3034	0.1862	0.959555	0.422693
Jiangxi	2010	0.422	0.1003	0.3526	0.1677	0.830461	0.373187
Shandong	2010	0.2023	0.1521	0.4699	0.2327	0.859621	0.447251
Henan	2010	0.2061	0.1117	0.257	0.1415	0.919073	0.360623
Hubei	2010	0.281	0.198	0.2836	0.1935	0.984077	0.43637
Hunan	2010	0.3613	0.1474	0.2793	0.1668	0.951024	0.398285
Guangdong	2010	0.4106	0.1992	0.7726	0.3571	0.807375	0.536948
Guangxi	2010	0.3718	0.1554	0.3062	0.1798	0.945132	0.412231
Hainan	2010	0.3674	0.1449	0.3396	0.1857	0.915702	0.412366
Chongqing	2010	0.2453	0.1537	0.3577	0.1961	0.916992	0.424054
Sichuan	2010	0.2803	0.2358	0.2859	0.2132	0.995378	0.460668
Guizhou	2010	0.2604	0.1486	0.2124	0.1451	0.984259	0.37791
Yunnan	2010	0.3151	0.1851	0.2837	0.1871	0.977632	0.427686
Shanxi	2010	0.2021	0.2165	0.3072	0.2107	0.984888	0.455539
Gansu	2010	0.1385	0.224	0.2023	0.1794	0.998704	0.423282
Qinghai	2010	0.2651	0.2338	0.2271	0.1926	0.999894	0.438839
Ningxia	2010	0.2511	0.193	0.2772	0.1889	0.983836	0.431099
Xinjiang	2010	0.2587	0.2176	0.2594	0.1953	0.996153	0.441077
Beijing	2011	0.2349	0.1192	0.4036	0.1941	0.839089	0.403568
Tianjin	2011	0.1301	0.1799	0.3019	0.1906	0.967409	0.429405
Hebei	2011	0.1996	0.105	0.5048	0.2208	0.755087	0.408317
Shanxi	2011	0.1756	0.1991	0.2747	0.1911	0.987188	0.43434
Inner Mongolia	2011	0.1676	0.1756	0.4135	0.2256	0.914831	0.454297
Liaoning	2011	0.1987	0.115	0.3902	0.1876	0.838608	0.39664
Jilin	2011	0.1875	0.1266	0.3089	0.1663	0.908171	0.388624
Heilongjiang	2011	0.226	0.1823	0.3193	0.1976	0.961978	0.43599
Shanghai	2011	0.1726	0.1404	0.2321	0.1476	0.969226	0.37823
Jiangsu	2011	0.2588	0.157	0.4652	0.2336	0.8687	0.450476
Zhejiang	2011	0.3039	0.168	0.3361	0.196	0.942762	0.429862
Anhui	2011	0.2349	0.1082	0.353	0.1718	0.847504	0.381577
Fujian	2011	0.3204	0.146	0.3343	0.1844	0.919945	0.411871
Jiangxi	2011	0.3131	0.0948	0.3853	0.1758	0.796163	0.37412
Shandong	2011	0.2068	0.1669	0.5179	0.2561	0.858652	0.468936
Henan	2011	0.2091	0.1193	0.2703	0.1498	0.921837	0.371606
Hubei	2011	0.2492	0.1686	0.3278	0.1936	0.947178	0.428221
Hunan	2011	0.2891	0.1325	0.2832	0.1607	0.931976	0.386999
Guangdong	2011	0.3553	0.2039	0.4067	0.2375	0.943233	0.473305
Guangxi	2011	0.3121	0.1486	0.3255	0.1828	0.92778	0.411823
Hainan	2011	0.388	0.1337	0.3509	0.1838	0.893931	0.405345
Chongqing	2011	0.2476	0.1523	0.4329	0.2205	0.877545	0.439885
Sichuan	2011	0.2683	0.2492	0.3108	0.2282	0.993932	0.476251
Guizhou	2011	0.2213	0.1365	0.2349	0.1466	0.964264	0.37598
Yunnan	2011	0.2871	0.189	0.3069	0.1968	0.971326	0.437215
Shanxi	2011	0.2171	0.2092	0.303	0.2056	0.983088	0.449581
Gansu	2011	0.1384	0.19	0.2104	0.1651	0.998701	0.406061
Qinghai	2011	0.2666	0.2639	0.2468	0.2142	0.999439	0.462688
Ningxia	2011	0.2511	0.2024	0.2716	0.1917	0.989286	0.435484
Xinjiang	2011	0.2448	0.2113	0.2841	0.2004	0.989144	0.445224
Beijing	2012	0.2351	0.1319	0.4563	0.2181	0.834166	0.426534
Tianjin	2012	0.1429	0.1683	0.3022	0.1849	0.958649	0.421016
Hebei	2012	0.2	0.1046	0.4525	0.2031	0.781038	0.398282
Shanxi	2012	0.1748	0.2024	0.3147	0.2061	0.976133	0.448532
Inner Mongolia	2012	0.1739	0.141	0.4474	0.2196	0.853719	0.432986
Liaoning	2012	0.221	0.1273	0.5047	0.2319	0.802128	0.431293
Jilin	2012	0.2045	0.125	0.3134	0.167	0.902951	0.38832
Heilongjiang	2012	0.242	0.1683	0.3477	0.2001	0.937615	0.433148
Shanghai	2012	0.2042	0.1497	0.232	0.1522	0.976479	0.385513
Jiangsu	2012	0.2484	0.1733	0.4982	0.2527	0.875155	0.470268
Zhejiang	2012	0.3962	0.1775	0.3986	0.2216	0.923421	0.452361
Anhui	2012	0.2416	0.1197	0.3724	0.184	0.858082	0.39735
Fujian	2012	0.4236	0.178	0.3497	0.2056	0.945585	0.440922
Jiangxi	2012	0.418	0.0972	0.4173	0.1877	0.782892	0.383339
Shandong	2012	0.1973	0.1694	0.5692	0.2744	0.840833	0.480338
Henan	2012	0.1975	0.1252	0.2937	0.1605	0.915533	0.383331
Hubei	2012	0.256	0.1772	0.3417	0.2025	0.94842	0.438241
Hunan	2012	0.3641	0.1481	0.307	0.1764	0.937065	0.406569
Guangdong	2012	0.4084	0.2108	0.3993	0.2385	0.951073	0.476268
Guangxi	2012	0.3916	0.1542	0.3431	0.1915	0.925048	0.420888
Hainan	2012	0.337	0.1373	0.3507	0.1856	0.899318	0.40855
Chongqing	2012	0.247	0.1735	0.4191	0.2265	0.910074	0.454017
Sichuan	2012	0.2969	0.2424	0.3286	0.2307	0.988539	0.477552
Guizhou	2012	0.2601	0.1337	0.2616	0.1541	0.94621	0.381852
Yunnan	2012	0.2957	0.2016	0.3155	0.206	0.97544	0.448264
Shanxi	2012	0.1987	0.208	0.3195	0.2105	0.977405	0.45359
Gansu	2012	0.1382	0.188	0.2504	0.1775	0.989818	0.419157
Qinghai	2012	0.2977	0.2806	0.2546	0.2252	0.998819	0.474272
Ningxia	2012	0.2196	0.1754	0.2787	0.1806	0.973782	0.419363
Xinjiang	2012	0.2614	0.2321	0.3329	0.227	0.983957	0.472608
Beijing	2013	0.2365	0.1428	0.5004	0.2382	0.831202	0.444963
Tianjin	2013	0.1282	0.1688	0.3199	0.191	0.951001	0.426194
Hebei	2013	0.2007	0.1314	0.4564	0.2178	0.833242	0.426005
Shanxi	2013	0.1782	0.2093	0.3309	0.215	0.974335	0.457692
Inner Mongolia	2013	0.1814	0.1932	0.4792	0.2563	0.905033	0.481622
Liaoning	2013	0.2162	0.149	0.3928	0.2054	0.893038	0.428287
Jilin	2013	0.2186	0.1467	0.3151	0.1784	0.931141	0.407573
Heilongjiang	2013	0.2748	0.1694	0.3805	0.2115	0.92338	0.441922
Shanghai	2013	0.1758	0.1489	0.2547	0.1594	0.96503	0.392206
Jiangsu	2013	0.2509	0.1955	0.5816	0.2916	0.867838	0.503052
Zhejiang	2013	0.3338	0.2019	0.4063	0.2364	0.941836	0.471858
Anhui	2013	0.2374	0.1437	0.4412	0.2189	0.860983	0.43413
Fujian	2013	0.384	0.1959	0.3785	0.2241	0.948125	0.46095
Jiangxi	2013	0.346	0.1103	0.3882	0.1846	0.830195	0.391477
Shandong	2013	0.1962	0.1902	0.6139	0.2997	0.849912	0.504697
Henan	2013	0.2043	0.152	0.3303	0.1861	0.929156	0.415832
Hubei	2013	0.2683	0.1815	0.3355	0.2026	0.954606	0.439776
Hunan	2013	0.3329	0.147	0.3273	0.1826	0.924929	0.410965
Guangdong	2013	0.4223	0.2169	0.4354	0.2536	0.942229	0.488824
Guangxi	2013	0.3909	0.1521	0.3582	0.1955	0.914812	0.422902
Hainan	2013	0.3967	0.1363	0.3571	0.1872	0.89428	0.409157
Chongqing	2013	0.2498	0.1676	0.4085	0.22	0.908375	0.447037
Sichuan	2013	0.2832	0.2475	0.352	0.2411	0.98469	0.487246
Guizhou	2013	0.2521	0.1286	0.3024	0.1651	0.915091	0.388692
Yunnan	2013	0.2969	0.2118	0.3366	0.2181	0.973761	0.460844
Shanxi	2013	0.2017	0.2332	0.335	0.2283	0.98382	0.473926
Gansu	2013	0.1405	0.2037	0.3011	0.2022	0.981209	0.445422
Qinghai	2013	0.2386	0.2824	0.2541	0.2259	0.998608	0.474958
Ningxia	2013	0.2203	0.1827	0.3059	0.1933	0.967688	0.432498
Xinjiang	2013	0.2621	0.2713	0.3605	0.2558	0.989983	0.503227
Beijing	2014	0.2344	0.1592	0.6014	0.2801	0.81363	0.477386
Tianjin	2014	0.1214	0.1741	0.3393	0.2002	0.946816	0.435376
Hebei	2014	0.1964	0.1697	0.4515	0.2354	0.891186	0.458023
Shanxi	2014	0.1847	0.3512	0.3248	0.2839	0.999237	0.532619
Inner Mongolia	2014	0.17	0.4429	0.5307	0.3984	0.995925	0.629902
Liaoning	2014	0.1968	0.165	0.3758	0.2078	0.920903	0.437451
Jilin	2014	0.1916	0.1501	0.3295	0.1849	0.927404	0.414098
Heilongjiang	2014	0.2503	0.1812	0.3473	0.2064	0.949328	0.442653
Shanghai	2014	0.2165	0.1582	0.2808	0.1727	0.960212	0.407221
Jiangsu	2014	0.271	0.1906	0.5896	0.2918	0.859338	0.500754
Zhejiang	2014	0.3674	0.2172	0.4417	0.2558	0.940165	0.490402
Anhui	2014	0.256	0.145	0.4285	0.2153	0.869273	0.432613
Fujian	2014	0.3863	0.2069	0.3496	0.22	0.966564	0.461134
Jiangxi	2014	0.3728	0.1156	0.3869	0.1868	0.841729	0.396529
Shandong	2014	0.1967	0.2586	0.6126	0.3335	0.913724	0.552021
Henan	2014	0.2017	0.1673	0.342	0.1977	0.939328	0.430935
Hubei	2014	0.285	0.1897	0.3611	0.2152	0.95035	0.452234
Hunan	2014	0.3615	0.1547	0.335	0.189	0.929753	0.419194
Guangdong	2014	0.3764	0.224	0.4225	0.2528	0.951697	0.490499
Guangxi	2014	0.3798	0.163	0.3551	0.1999	0.928722	0.430873
Hainan	2014	0.3477	0.1383	0.3587	0.1887	0.896294	0.411255
Chongqing	2014	0.2895	0.1849	0.392	0.2231	0.933342	0.456321
Sichuan	2014	0.287	0.2748	0.3721	0.2614	0.988624	0.508356
Guizhou	2014	0.2955	0.1872	0.3361	0.2056	0.958664	0.443961
Yunnan	2014	0.2964	0.2235	0.3298	0.2217	0.981371	0.466444
Shanxi	2014	0.2042	0.3294	0.3691	0.2877	0.998384	0.535943
Gansu	2014	0.1403	0.1998	0.3001	0.1999	0.979665	0.442533
Qinghai	2014	0.2741	0.2817	0.2689	0.2305	0.99973	0.480039
Ningxia	2014	0.2343	0.2726	0.3161	0.2417	0.997266	0.490957
Xinjiang	2014	0.2473	0.3178	0.3937	0.2901	0.994294	0.53707
Beijing	2015	0.2443	0.1668	0.5346	0.2616	0.851484	0.471962
Tianjin	2015	0.129	0.1878	0.3014	0.1944	0.972664	0.43484
Hebei	2015	0.2026	0.1568	0.4307	0.222	0.884673	0.443167
Shanxi	2015	0.1841	0.3487	0.3546	0.2926	0.999965	0.540916
Inner Mongolia	2015	0.1698	0.3776	0.5245	0.3636	0.986652	0.598955
Liaoning	2015	0.1989	0.14	0.3907	0.2002	0.881387	0.420064
Jilin	2015	0.1977	0.1395	0.3438	0.1844	0.906261	0.408796
Heilongjiang	2015	0.2461	0.1687	0.3483	0.2005	0.937721	0.433605
Shanghai	2015	0.247	0.1605	0.2768	0.1725	0.963987	0.407784
Jiangsu	2015	0.2871	0.217	0.62	0.3152	0.876456	0.525603
Zhejiang	2015	0.405	0.2156	0.4337	0.2524	0.941898	0.487581
Anhui	2015	0.2705	0.1479	0.4399	0.2206	0.867884	0.437556
Fujian	2015	0.4139	0.2073	0.3696	0.2269	0.959611	0.466622
Jiangxi	2015	0.4141	0.1206	0.3889	0.1899	0.850116	0.401792
Shandong	2015	0.198	0.2194	0.5686	0.2992	0.896449	0.517897
Henan	2015	0.2072	0.1541	0.3447	0.192	0.924114	0.421224
Hubei	2015	0.2942	0.176	0.3378	0.2006	0.949122	0.436341
Hunan	2015	0.3712	0.1616	0.4534	0.2319	0.880271	0.451813
Guangdong	2015	0.4018	0.2269	0.4319	0.2574	0.950354	0.494592
Guangxi	2015	0.4204	0.1785	0.3776	0.2151	0.93371	0.448153
Hainan	2015	0.2703	0.1381	0.3475	0.1849	0.902247	0.408443
Chongqing	2015	0.2588	0.188	0.385	0.2223	0.939041	0.45689
Sichuan	2015	0.2838	0.2799	0.3621	0.2607	0.991769	0.508482
Guizhou	2015	0.2956	0.1828	0.3383	0.2042	0.954439	0.441471
Yunnan	2015	0.3082	0.2332	0.3243	0.2247	0.986559	0.470829
Shanxi	2015	0.2021	0.3253	0.3611	0.283	0.998639	0.531615
Gansu	2015	0.1419	0.178	0.2935	0.1868	0.969532	0.425569
Qinghai	2015	0.227	0.2857	0.2624	0.2303	0.999096	0.479679
Ningxia	2015	0.2443	0.2631	0.328	0.2409	0.993954	0.48933
Xinjiang	2015	0.2572	0.3057	0.3692	0.2759	0.995564	0.524095
Beijing	2016	0.2477	0.1742	0.6284	0.2966	0.824466	0.494507
Tianjin	2016	0.136	0.1746	0.2883	0.1834	0.969365	0.421641
Hebei	2016	0.1973	0.1384	0.4325	0.2134	0.857099	0.427674
Shanxi	2016	0.1833	0.2988	0.4346	0.2943	0.982707	0.537783
Inner Mongolia	2016	0.1778	0.3678	0.5006	0.3508	0.988238	0.58879
Liaoning	2016	0.2111	0.151	0.323	0.1832	0.93184	0.413174
Jilin	2016	0.216	0.1318	0.3382	0.1786	0.898414	0.400571
Heilongjiang	2016	0.2507	0.1426	0.3546	0.1895	0.90454	0.414017
Shanghai	2016	0.2466	0.1872	0.2836	0.1881	0.978813	0.429086
Jiangsu	2016	0.3103	0.2248	0.5622	0.2998	0.903439	0.520433
Zhejiang	2016	0.3915	0.2177	0.5123	0.2796	0.914952	0.505787
Anhui	2016	0.3018	0.1638	0.4716	0.2391	0.874836	0.457355
Fujian	2016	0.5083	0.2066	0.3615	0.2238	0.96211	0.464026
Jiangxi	2016	0.4295	0.1104	0.4205	0.1954	0.81168	0.398249
Shandong	2016	0.2046	0.2572	0.6076	0.3311	0.914237	0.550185
Henan	2016	0.2139	0.1785	0.379	0.2156	0.933091	0.448525
Hubei	2016	0.3254	0.1966	0.4168	0.2372	0.933344	0.47052
Hunan	2016	0.39	0.1519	0.3505	0.1928	0.918551	0.420829
Guangdong	2016	0.4445	0.2205	0.471	0.2673	0.932079	0.499144
Guangxi	2016	0.4004	0.163	0.3615	0.202	0.925619	0.432406
Hainan	2016	0.399	0.1539	0.352	0.1943	0.920144	0.422829
Chongqing	2016	0.2814	0.1715	0.3917	0.2163	0.920399	0.446186
Sichuan	2016	0.2874	0.281	0.4026	0.2747	0.984052	0.519922
Guizhou	2016	0.2856	0.1619	0.3558	0.1996	0.92721	0.430199
Yunnan	2016	0.3199	0.2049	0.3401	0.2158	0.968741	0.457225
Shanxi	2016	0.1993	0.3037	0.3878	0.2811	0.992577	0.528217
Gansu	2016	0.1456	0.1692	0.3189	0.1909	0.951806	0.426263
Qinghai	2016	0.2382	0.2539	0.2747	0.2185	0.999226	0.467259
Ningxia	2016	0.2166	0.2371	0.3464	0.234	0.982299	0.479435
Xinjiang	2016	0.2632	0.2667	0.3951	0.2651	0.980998	0.509963
Beijing	2017	0.2422	0.191	0.6274	0.3046	0.845967	0.507623
Tianjin	2017	0.1343	0.1769	0.3281	0.1978	0.954126	0.434426
Hebei	2017	0.2045	0.1527	0.5116	0.2469	0.841493	0.455812
Shanxi	2017	0.1828	0.3352	0.3453	0.2827	0.99989	0.531666
Inner Mongolia	2017	0.1763	0.3778	0.4728	0.3465	0.993744	0.586798
Liaoning	2017	0.1978	0.1636	0.358	0.2011	0.927952	0.431985
Jilin	2017	0.2	0.1264	0.322	0.1705	0.899841	0.391692
Heilongjiang	2017	0.2432	0.1381	0.3407	0.1826	0.906064	0.406752
Shanghai	2017	0.1953	0.1832	0.2715	0.1821	0.980963	0.42265
Jiangsu	2017	0.27	0.2269	0.5461	0.2955	0.91076	0.518777
Zhejiang	2017	0.3395	0.2034	0.445	0.25	0.927988	0.481661
Anhui	2017	0.2629	0.1592	0.4799	0.2396	0.864984	0.455247
Fujian	2017	0.3686	0.1898	0.3866	0.2238	0.939907	0.458641
Jiangxi	2017	0.37	0.1086	0.43	0.1976	0.80244	0.398199
Shandong	2017	0.1966	0.2598	0.6663	0.352	0.898518	0.562386
Henan	2017	0.2159	0.1738	0.4947	0.2518	0.877252	0.469992
Hubei	2017	0.3107	0.1854	0.4098	0.2293	0.926207	0.460846
Hunan	2017	0.3631	0.146	0.3566	0.1919	0.907977	0.417421
Guangdong	2017	0.3829	0.2385	0.4802	0.2793	0.941754	0.512866
Guangxi	2017	0.4074	0.1563	0.3625	0.199	0.917621	0.427325
Hainan	2017	0.349	0.1587	0.3614	0.1998	0.920928	0.428954
Chongqing	2017	0.2853	0.1736	0.4214	0.2273	0.909149	0.454587
Sichuan	2017	0.2908	0.2831	0.413	0.2792	0.982434	0.523732
Guizhou	2017	0.2828	0.1581	0.3962	0.2111	0.903043	0.436615
Yunnan	2017	0.3302	0.1933	0.3465	0.2122	0.958881	0.451082
Shanxi	2017	0.2121	0.3034	0.3895	0.2815	0.99225	0.528506
Gansu	2017	0.1449	0.172	0.324	0.194	0.951886	0.429728
Qinghai	2017	0.2777	0.2336	0.274	0.2081	0.996828	0.455456
Ningxia	2017	0.2095	0.2122	0.3354	0.2179	0.974363	0.460775
Xinjiang	2017	0.2564	0.2494	0.4329	0.269	0.963156	0.509008
Beijing	2018	0.2652	0.1837	0.5874	0.2877	0.852002	0.495097
Tianjin	2018	0.1541	0.1902	0.2666	0.184	0.985914	0.42592
Hebei	2018	0.2064	0.1725	0.3873	0.2154	0.923454	0.445996
Shanxi	2018	0.1858	0.353	0.3126	0.2807	0.998156	0.529323
Inner Mongolia	2018	0.1821	0.398	0.362	0.3197	0.998877	0.565103
Liaoning	2018	0.1972	0.1685	0.3117	0.1882	0.954501	0.423836
Jilin	2018	0.2119	0.1295	0.3408	0.1784	0.893387	0.399225
Heilongjiang	2018	0.2583	0.1427	0.3281	0.1807	0.919197	0.407552
Shanghai	2018	0.2057	0.1861	0.2738	0.1843	0.98165	0.425345
Jiangsu	2018	0.2742	0.2432	0.4498	0.2715	0.954527	0.509072
Zhejiang	2018	0.3343	0.2164	0.4026	0.2424	0.953685	0.480805
Anhui	2018	0.2634	0.161	0.4274	0.223	0.891636	0.445909
Fujian	2018	0.3392	0.1845	0.3918	0.2229	0.933065	0.456048
Jiangxi	2018	0.3319	0.1104	0.4325	0.1994	0.804985	0.400642
Shandong	2018	0.2037	0.2685	0.5187	0.3072	0.948146	0.539695
Henan	2018	0.219	0.1814	0.4334	0.2352	0.912135	0.463178
Hubei	2018	0.2871	0.1893	0.3533	0.2124	0.953229	0.449962
Hunan	2018	0.3305	0.1448	0.3319	0.183	0.919756	0.410263
Guangdong	2018	0.397	0.2415	0.4244	0.2622	0.96154	0.502111
Guangxi	2018	0.3776	0.1525	0.3505	0.1931	0.919265	0.42132
Hainan	2018	0.3777	0.1691	0.3387	0.1975	0.942577	0.431461
Chongqing	2018	0.2772	0.1687	0.4068	0.22	0.910401	0.447536
Sichuan	2018	0.3135	0.2904	0.428	0.2879	0.981485	0.531573
Guizhou	2018	0.2885	0.1622	0.3609	0.2014	0.925048	0.43163
Yunnan	2018	0.3391	0.2004	0.3404	0.2137	0.965911	0.454329
Shanxi	2018	0.2084	0.312	0.3171	0.2617	0.999967	0.511558
Gansu	2018	0.1487	0.1713	0.316	0.191	0.954895	0.427066
Qinghai	2018	0.3187	0.2558	0.2722	0.2186	0.999518	0.467434
Ningxia	2018	0.1714	0.2014	0.3304	0.2108	0.970133	0.452221
Xinjiang	2018	0.2491	0.2716	0.3456	0.251	0.992786	0.499189
Beijing	2019	0.2706	0.1659	0.5975	0.2821	0.824841	0.482377
Tianjin	2019	0.1456	0.1961	0.2574	0.1839	0.990822	0.426863
Hebei	2019	0.2098	0.1826	0.4048	0.2262	0.925692	0.457593
Shanxi	2019	0.1848	0.3596	0.3288	0.2894	0.998999	0.53769
Inner Mongolia	2019	0.1772	0.4102	0.3474	0.3209	0.996558	0.565505
Liaoning	2019	0.2064	0.1766	0.2944	0.1864	0.968218	0.424825
Jilin	2019	0.2137	0.1295	0.3154	0.1699	0.908518	0.392883
Heilongjiang	2019	0.2762	0.1361	0.3069	0.1704	0.922686	0.396517
Shanghai	2019	0.2266	0.173	0.2705	0.1767	0.975535	0.415183
Jiangsu	2019	0.2559	0.2596	0.4416	0.277	0.965728	0.517211
Zhejiang	2019	0.3867	0.2235	0.3998	0.245	0.959164	0.484763
Anhui	2019	0.2289	0.1571	0.4384	0.2247	0.881397	0.445028
Fujian	2019	0.4058	0.1874	0.3923	0.2245	0.93545	0.458267
Jiangxi	2019	0.407	0.1235	0.4498	0.2117	0.822226	0.417211
Shandong	2019	0.1969	0.2674	0.4811	0.2941	0.958377	0.530904
Henan	2019	0.2112	0.1741	0.4692	0.2435	0.888577	0.465154
Hubei	2019	0.2687	0.183	0.3814	0.2186	0.936179	0.452381
Hunan	2019	0.377	0.1434	0.3382	0.1844	0.914545	0.41066
Guangdong	2019	0.4097	0.2404	0.4663	0.2756	0.947534	0.511019
Guangxi	2019	0.4	0.1475	0.3568	0.1927	0.909807	0.418712
Hainan	2019	0.2997	0.1829	0.3421	0.2055	0.952915	0.44252
Chongqing	2019	0.2717	0.1683	0.4093	0.2206	0.908795	0.44775
Sichuan	2019	0.3058	0.2975	0.4479	0.2981	0.979433	0.540341
Guizhou	2019	0.301	0.1671	0.3738	0.2082	0.924104	0.438632
Yunnan	2019	0.2962	0.2142	0.354	0.2251	0.96926	0.467098
Shanxi	2019	0.2155	0.3243	0.2745	0.2537	0.996536	0.502813
Gansu	2019	0.1458	0.1912	0.3242	0.2037	0.966131	0.443622
Qinghai	2019	0.3104	0.2891	0.2725	0.2354	0.999563	0.485074
Ningxia	2019	0.1892	0.2206	0.3197	0.2169	0.983035	0.461758
Xinjiang	2019	0.2583	0.276	0.3563	0.2568	0.991903	0.504699
Beijing	2020	0.2551	0.1565	0.5156	0.2501	0.845298	0.459792
Tianjin	2020	0.1419	0.1911	0.2686	0.1851	0.985687	0.427142
Hebei	2020	0.2182	0.1594	0.4596	0.2329	0.874528	0.451306
Shanxi	2020	0.1866	0.3675	0.3326	0.2946	0.998757	0.542433
Inner Mongolia	2020	0.1808	0.3914	0.3522	0.3131	0.99861	0.559164
Liaoning	2020	0.2107	0.1668	0.326	0.1921	0.946381	0.42638
Jilin	2020	0.228	0.1338	0.3266	0.1758	0.908094	0.399553
Heilongjiang	2020	0.2809	0.1395	0.3349	0.1814	0.911234	0.406568
Shanghai	2020	0.2487	0.1527	0.2589	0.1627	0.96614	0.396473
Jiangsu	2020	0.2922	0.2558	0.4854	0.2897	0.950812	0.524834
Zhejiang	2020	0.3576	0.2365	0.4361	0.2636	0.954952	0.501722
Anhui	2020	0.307	0.1611	0.4342	0.2253	0.88856	0.447429
Fujian	2020	0.3356	0.1795	0.4184	0.2292	0.916705	0.458376
Jiangxi	2020	0.3808	0.1124	0.4375	0.202	0.806526	0.403631
Shandong	2020	0.2099	0.2358	0.5151	0.2896	0.928251	0.51848
Henan	2020	0.2189	0.1647	0.5017	0.2496	0.862708	0.464039
Hubei	2020	0.352	0.1939	0.381	0.224	0.94556	0.460223
Hunan	2020	0.3883	0.1552	0.3722	0.2017	0.911431	0.428761
Guangdong	2020	0.3706	0.2403	0.5247	0.2951	0.928327	0.523402
Guangxi	2020	0.389	0.1501	0.4084	0.2112	0.886625	0.43273
Hainan	2020	0.3055	0.1713	0.3483	0.2018	0.940191	0.435581
Chongqing	2020	0.3266	0.18	0.4277	0.2326	0.913159	0.46087
Sichuan	2020	0.326	0.2966	0.4732	0.306	0.97333	0.545746
Guizhou	2020	0.3201	0.1847	0.3844	0.2205	0.936411	0.454399
Yunnan	2020	0.3205	0.2065	0.3567	0.2222	0.963782	0.462766
Shanxi	2020	0.2206	0.3243	0.3636	0.2834	0.998367	0.531918
Gansu	2020	0.1467	0.186	0.3403	0.2064	0.956058	0.444219
Qinghai	2020	0.3344	0.2791	0.2878	0.2355	0.999882	0.485255
Ningxia	2020	0.2008	0.2359	0.3367	0.2302	0.984383	0.47603
Xinjiang	2020	0.2521	0.2804	0.3672	0.2626	0.990977	0.510128
Beijing	2021	0.2881	0.16	0.478	0.2393	0.866928	0.455473
Tianjin	2021	0.1598	0.2143	0.2487	0.1901	0.997236	0.435402
Hebei	2021	0.2158	0.2677	0.4316	0.2777	0.972146	0.519581
Shanxi	2021	0.1885	0.3487	0.301	0.2747	0.997301	0.523411
Inner Mongolia	2021	0.1908	0.2155	0.3376	0.2203	0.975329	0.463535
Liaoning	2021	0.23	0.1933	0.3249	0.205	0.967216	0.445286
Jilin	2021	0.2182	0.1441	0.3328	0.183	0.918388	0.409957
Heilongjiang	2021	0.2717	0.1559	0.3438	0.1926	0.926609	0.422451
Shanghai	2021	0.2396	0.1568	0.2657	0.167	0.966211	0.401693
Jiangsu	2021	0.2828	0.2355	0.4507	0.268	0.949551	0.50446
Zhejiang	2021	0.3994	0.2333	0.4243	0.2581	0.95689	0.496964
Anhui	2021	0.2685	0.4753	0.4219	0.3783	0.998227	0.614516
Fujian	2021	0.3399	0.2349	0.3938	0.2487	0.967533	0.490536
Jiangxi	2021	0.3563	0.1498	0.4613	0.2287	0.860331	0.443574
Shandong	2021	0.2204	0.2285	0.5056	0.2828	0.926022	0.511741
Henan	2021	0.2394	0.2274	0.5191	0.2867	0.920494	0.513717
Hubei	2021	0.3135	0.2376	0.417	0.2578	0.961712	0.497925
Hunan	2021	0.3605	0.167	0.3929	0.2145	0.914995	0.44302
Guangdong	2021	0.3545	0.2888	0.5042	0.3125	0.962403	0.548408
Guangxi	2021	0.3486	0.1458	0.37	0.1962	0.900592	0.420353
Hainan	2021	0.3323	0.1635	0.3638	0.203	0.925044	0.43334
Chongqing	2021	0.3176	0.4123	0.4274	0.3486	0.999838	0.590376
Sichuan	2021	0.3171	0.2991	0.4941	0.3143	0.969311	0.551955
Guizhou	2021	0.2969	0.1898	0.3889	0.2245	0.938952	0.459124
Yunnan	2021	0.3112	0.2033	0.3714	0.2255	0.956265	0.464368
Shanxi	2021	0.2529	0.3164	0.3587	0.2778	0.998035	0.526549
Gansu	2021	0.1409	0.4953	0.3313	0.3581	0.980121	0.592437
Qinghai	2021	0.2941	0.2803	0.2862	0.2356	0.999946	0.485373
Ningxia	2021	0.2094	0.2508	0.3141	0.2301	0.993702	0.478174
Xinjiang	2021	0.2469	0.2884	0.3623	0.265	0.99353	0.513113
Beijing	2022	0.2815	0.1743	0.4821	0.2479	0.88324	0.467926
Tianjin	2022	0.1423	0.203	0.2542	0.1862	0.99371	0.43015
Hebei	2022	0.2138	0.1887	0.4665	0.2499	0.905666	0.475737
Shanxi	2022	0.1905	0.4061	0.3207	0.31	0.993073	0.554845
Inner Mongolia	2022	0.1746	0.4586	0.3331	0.3403	0.987356	0.579653
Liaoning	2022	0.2293	0.1987	0.3136	0.2039	0.974524	0.445764
Jilin	2022	0.2344	0.1531	0.3533	0.1943	0.918535	0.422459
Heilongjiang	2022	0.2504	0.1631	0.344	0.1962	0.934206	0.428125
Shanghai	2022	0.1897	0.1688	0.2754	0.1762	0.970777	0.413583
Jiangsu	2022	0.2661	0.2416	0.468	0.2768	0.947737	0.512185
Zhejiang	2022	0.3471	0.2374	0.4037	0.2533	0.965771	0.494601
Anhui	2022	0.2372	0.1665	0.4678	0.2392	0.879979	0.458793
Fujian	2022	0.3907	0.1923	0.3859	0.2248	0.942278	0.460243
Jiangxi	2022	0.3706	0.123	0.441	0.2085	0.825891	0.414968
Shandong	2022	0.2084	0.2307	0.5156	0.2872	0.924266	0.515218
Henan	2022	0.2069	0.175	0.4734	0.2453	0.88781	0.466669
Hubei	2022	0.2772	0.192	0.4216	0.2365	0.927354	0.468315
Hunan	2022	0.3478	0.1614	0.3693	0.2038	0.920073	0.433025
Guangdong	2022	0.4188	0.2731	0.4503	0.2867	0.969535	0.527224
Guangxi	2022	0.3901	0.1484	0.3326	0.1851	0.923768	0.413509
Hainan	2022	0.3464	0.1898	0.3614	0.2154	0.950305	0.452433
Chongqing	2022	0.2506	0.1796	0.4427	0.2374	0.906229	0.463831
Sichuan	2022	0.2844	0.2985	0.5203	0.3227	0.962612	0.557346
Guizhou	2022	0.2726	0.1962	0.3912	0.2285	0.943289	0.464265
Yunnan	2022	0.3162	0.2186	0.3905	0.2395	0.95935	0.479337
Shanxi	2022	0.2164	0.3287	0.3622	0.2851	0.998824	0.533633
Gansu	2022	0.1401	0.2187	0.3509	0.2263	0.972694	0.46917
Qinghai	2022	0.2668	0.2602	0.2844	0.2249	0.999012	0.474002
Ningxia	2022	0.2034	0.277	0.3289	0.2481	0.996325	0.49718
Xinjiang	2022	0.2501	0.3325	0.3591	0.286	0.99926	0.534592
