# Supplementary material for: Water-energy-carbon coupling relationships and barrier analysis: an empirical study based on China
Source: Frontiers journal article supplement (doi:10.3389/feart.2025.1570713), 2025-06-18
Supplement: Table_4.xlsx [file Table_4.xlsx]

## Sheet: 标准化矩阵
Province	year	X1	X2	X3	X4	X5	X6	X7	X8	X9	X10	X11	X12
Beijing	2008	0.188568	0.00900589	0.232042	0.883094	0.0915635	0.914286	0.0214477	0.927001	0.983986	0.286878	0.89869	0.646085
Beijing	2009	0.136872	0.00437982	0.267958	0.812857	0.0562216	0.903297	0.022118	0.933218	0.986844	0.450673	0.868393	0.668929
Beijing	2010	0.197798	0.0042391	0.268362	0.824991	0.0599236	0.912088	0.0216153	0.948108	0.98971	0.450673	0.873635	0.698725
Beijing	2011	0.172581	0.00485474	0.257466	0.846109	0.0704687	0.951648	0.0229558	0.955347	0.991583	0.450673	0.863321	0.692104
Beijing	2012	0.211746	0.00828472	0.20904	0.896745	0.106666	0.936264	0.0227882	0.96103	0.992974	0.450673	0.86898	0.716934
Beijing	2013	0.175018	0.00391076	0.242534	0.831525	0.0647708	0.940659	0.023626	0.963026	0.993923	0.515189	0.864289	0.740109
Beijing	2014	0.135213	0.00253291	0.256255	0.787306	0.0519447	0.951648	0.0254692	0.965846	0.994652	0.515189	0.857608	0.76494
Beijing	2015	0.205351	0.00422738	0.248588	0.836542	0.0704687	0.962637	0.0266421	0.978031	0.995311	0.515189	0.856497	0.803013
Beijing	2016	0.257912	0.00643194	0.216303	0.873877	0.094125	0.964835	0.0276475	0.979895	0.996306	0.515189	0.840499	0.839431
Beijing	2017	0.19543	0.00500132	0.214689	0.848092	0.0790225	0.973626	0.0288204	0.984939	0.996988	0.515189	0.876699	0.95365
Beijing	2018	0.17023	0.00658439	0.266747	0.873644	0.0952655	0.984615	0.0284853	0.988555	0.997752	0.639367	0.884079	0.971859
Beijing	2019	0.156558	0.00365278	0.343422	0.80504	0.0642005	0.940659	0.0325067	0.989232	0.998539	0.639367	0.895132	0.983446
Beijing	2020	0.153482	0.00386386	0.286925	0.819158	0.0676221	0.887912	0.0306635	0.99177	0.998904	0.639367	0.891316	0.938752
Beijing	2021	0.29566	0.013374	0.251009	0.925096	0.1688	1	0.0309987	0.999089	0.999652	0.639367	0.898948	0.948684
Beijing	2022	0.147242	0.00331271	0.394673	0.805857	0.0616344	0.978022	0.0296582	1	1	0.639367	0.883683	0.963582
Tianjin	2008	0.187929	0.0063264	0.0682002	0.860576	0.0659674	0.43956	0	0.960419	0.982894	0.0814281	0.955645	0.538156
Tianjin	2009	0.136734	0.00439155	0.0867635	0.823241	0.053791	0.435165	0.00184316	0.954419	0.985569	0.082994	0.956808	0.665618
Tianjin	2010	0.192371	0.00122541	0.135593	0.717419	0.0302236	0.492308	0.000335121	0.95733	0.990079	0.082994	0.947497	0.751697
Tianjin	2011	0.180428	0.00375832	0.074657	0.827791	0.0545763	0.47033	0.00134048	0.962366	0.992739	0.082994	0.948639	0.776527
Tianjin	2012	0.304527	0.0109114	0.031477	0.920896	0.123316	0.430769	0.00134048	0.966586	0.994427	0.082994	0.931573	0.799702
Tianjin	2013	0.167862	0.00290815	0.0762712	0.812624	0.0514352	0.426374	0.0025134	0.966967	0.995335	0.108519	0.930051	0.829498
Tianjin	2014	0.14866	0.0014189	0.0694108	0.756154	0.0388662	0.410989	0.00301609	0.968928	0.996166	0.108519	0.92444	0.846052
Tianjin	2015	0.19562	0.00185864	0.0928168	0.768522	0.0443631	0.375824	0.00569705	0.967888	0.996021	0.108519	0.920468	0.854329
Tianjin	2016	0.234285	0.00408666	0.0686037	0.834908	0.0683232	0.408791	0.00821046	0.965497	0.996244	0.108519	0.961854	0.864261
Tianjin	2017	0.148314	0.00184691	0.108959	0.756038	0.0451484	0.443956	0.00871314	0.967682	0.996501	0.108519	0.953238	0.872538
Tianjin	2018	0.229428	0.00357656	0.10573	0.814491	0.063219	0.52967	0.0102212	0.972307	0.996317	0.142969	0.945057	0.892402
Tianjin	2019	0.12403	0	0.1477	0.593746	0.0259046	0.536264	0.0102212	0.972471	0.992936	0.142969	0.94369	0.92882
Tianjin	2020	0.141694	0.00258568	0.114205	0.758955	0.0463263	0.476923	0.00921582	0.979818	0.993202	0.142969	0.970444	0.935441
Tianjin	2021	0.294035	0.0138665	0.0496368	0.908062	0.150417	0.432967	0.016756	0.983243	0.992638	0.142969	0.916937	0.942063
Tianjin	2022	0.163178	0.00406907	0.103713	0.766655	0.0592926	0.426374	0.0189343	0.986248	0.992625	0.142969	0.970444	0.968548
Hebei	2008	0.178872	0.0105069	0.280065	0.86151	0.0339489	0.21978	0.289377	0.876691	0.92559	0.230974	0.766123	0.624069
Hebei	2009	0.125724	0.00875964	0.288943	0.842725	0.0290457	0.221978	0.287198	0.88585	0.931008	0.303007	0.754912	0.738454
Hebei	2010	0.189104	0.00840784	0.266344	0.840042	0.0284754	0.228571	0.287198	0.908802	0.942693	0.303007	0.73579	0.867572
Hebei	2011	0.148314	0.0097212	0.262308	0.85731	0.0330047	0.248352	0.291052	0.918157	0.952782	0.303007	0.718351	0.894057
Hebei	2012	0.22082	0.0159655	0.220743	0.906079	0.0523934	0.21978	0.289879	0.925371	0.957118	0.303007	0.688698	0.900679
Hebei	2013	0.174136	0.0110639	0.256659	0.87586	0.0376369	0.228571	0.283177	0.927057	0.961076	0.320545	0.683091	0.905645
Hebei	2014	0.123252	0.00541761	0.277643	0.79104	0.0203796	0.230769	0.28569	0.93134	0.962461	0.320545	0.684285	0.913922
Hebei	2015	0.174551	0.00765735	0.277643	0.841092	0.0275359	0.241758	0.276307	0.938049	0.964291	0.320545	0.683475	0.917232
Hebei	2016	0.226628	0.0133564	0.197337	0.900478	0.0456579	0.268132	0.268599	0.945309	0.968231	0.320545	0.707193	0.918888
Hebei	2017	0.151442	0.00777462	0.277643	0.849609	0.0283258	0.283516	0.266924	0.952056	0.970614	0.320545	0.745438	0.958616
Hebei	2018	0.15661	0.0097212	0.244149	0.87306	0.0347155	0.29011	0.268264	0.955386	0.97245	0.373317	0.826474	0.965238
Hebei	2019	0.130995	0.00574595	0.286118	0.815424	0.0221886	0.281319	0.268097	0.958359	0.971591	0.373317	0.90751	0.966893
Hebei	2020	0.165512	0.00846061	0.297821	0.857076	0.0303077	0.281319	0.268934	0.961916	0.97256	0.373317	0.953567	0.970204
Hebei	2021	0.266934	0.0265721	0.174334	0.946447	0.087324	0.292308	0.267426	0.97266	0.976221	0.373317	0.861454	0.980136
Hebei	2022	0.145583	0.0117851	0.266344	0.889628	0.0406331	0.29011	0.268264	0.97534	0.977554	0.373317	0.953567	0.980136
Shanxi	2008	0.16667	0.0120196	0.302663	0.926846	0.0202254	0.334066	0.0579759	0.901232	0.951403	0.162073	0.905323	0.521602
Shanxi	2009	0.180497	0.0116619	0.296207	0.926263	0.0197439	0.347253	0.0569705	0.91838	0.95509	0.17507	0.906451	0.584506
Shanxi	2010	0.169763	0.0122893	0.279661	0.921479	0.02145	0.320879	0.0695375	0.927061	0.959904	0.17507	0.892918	0.745075
Shanxi	2011	0.216136	0.0173023	0.24657	0.933147	0.0312612	0.345055	0.0869638	0.93653	0.962127	0.17507	0.895278	0.771561
Shanxi	2012	0.195344	0.0142535	0.273608	0.922179	0.0258485	0.30989	0.0856233	0.930914	0.965774	0.17507	0.875489	0.796391
Shanxi	2013	0.202793	0.0174548	0.246973	0.93478	0.0319484	0.323077	0.0862936	0.931312	0.96714	0.236298	0.871424	0.803013
Shanxi	2014	0.189744	0.0148457	0.292171	0.92778	0.0272835	0.331868	0.0822721	0.930467	0.968893	0.236298	0.863795	0.803013
Shanxi	2015	0.164544	0.0120313	0.30912	0.911446	0.0221979	0.323077	0.0859584	0.912359	0.967751	0.236298	0.863557	0.816256
Shanxi	2016	0.232885	0.0183636	0.253834	0.937114	0.034192	0.323077	0.0891421	0.914994	0.967643	0.236298	0.87005	0.831154
Shanxi	2017	0.196986	0.0176365	0.261098	0.935713	0.0330234	0.331868	0.0881367	0.936338	0.974073	0.236298	0.874662	0.872538
Shanxi	2018	0.160102	0.0162235	0.270379	0.93163	0.0305414	0.351648	0.0871314	0.938317	0.976796	0.274977	0.873035	0.903989
Shanxi	2019	0.138687	0.0122776	0.280468	0.911679	0.0231842	0.356044	0.0899799	0.944796	0.976488	0.274977	0.874517	0.925509
Shanxi	2020	0.192423	0.0162939	0.239306	0.929063	0.0285362	0.397802	0.084618	0.952433	0.978767	0.274977	0.873168	0.988413
Shanxi	2021	0.292601	0.0319369	0.158999	0.962081	0.056259	0.413187	0.0842828	0.975658	0.984879	0.274977	0.875867	0.968548
Shanxi	2022	0.194635	0.0228138	0.234463	0.947964	0.0399927	0.415385	0.083445	0.984646	0.987578	0.274977	0.87047	0.970204
Inner Mongolia	2008	0.0734397	0.0972355	0.168281	0.952981	0.0115968	0.140659	0.257205	0.674114	0.854404	0.231131	0.945531	0.45903
Inner Mongolia	2009	0.0467705	0.0886518	0.16707	0.946797	0.0101524	0.127473	0.266421	0.705371	0.881498	0.267147	0.942263	0.584506
Inner Mongolia	2010	0.0610471	0.0893671	0.174738	0.948197	0.0105965	0.136264	0.267426	0.726449	0.901833	0.267147	0.920476	0.673895
Inner Mongolia	2011	0.0417581	0.0961391	0.143664	0.951348	0.0118912	0.136264	0.272118	0.756505	0.920107	0.267147	0.912427	0.728522
Inner Mongolia	2012	0.0969632	0.117311	0.142454	0.960681	0.0157709	0.0791209	0.271615	0.786498	0.928502	0.267147	0.91021	0.756663
Inner Mongolia	2013	0.0875434	0.222609	0.04318	0.980516	0.0348698	0.0835165	0.269605	0.800942	0.933389	0.283276	0.905312	0.799702
Inner Mongolia	2014	0.0672347	0.12301	0.115416	0.963365	0.0169394	0.0835165	0.267594	0.84483	0.937698	0.283276	0.89987	0.816256
Inner Mongolia	2015	0.0660421	0.1225	0.106941	0.962431	0.0169067	0.0791209	0.273961	0.857151	0.936503	0.283276	0.900977	0.880814
Inner Mongolia	2016	0.0626718	0.0963677	0.173123	0.950764	0.0122091	0.0791209	0.281501	0.876987	0.935982	0.283276	0.907731	0.903989
Inner Mongolia	2017	0.0378519	0.0689279	0.208232	0.93198	0.0072544	0.0857143	0.277647	0.899085	0.928045	0.283276	0.908221	0.922198
Inner Mongolia	2018	0.0840866	0.103843	0.16021	0.954264	0.0136955	0.0835165	0.284517	0.907647	0.931863	0.300031	0.903474	0.951995
Inner Mongolia	2019	0.0584026	0.100472	0.14891	0.953098	0.0131206	0.0901099	0.282507	0.923019	0.931999	0.300031	0.901382	0.951995
Inner Mongolia	2020	0.0733187	0.119598	0.133575	0.957765	0.0154997	0.0879121	0.288371	0.93282	0.931277	0.300031	0.901664	0.958616
Inner Mongolia	2021	0.0995212	0.227164	0.0403551	0.979116	0.0341546	0.0901099	0.283847	0.960984	0.943721	0.300031	0.9011	0.960271
Inner Mongolia	2022	0.0432964	0.121327	0.115012	0.958931	0.0157241	0.0857143	0.283512	0.969176	0.950941	0.300031	0.902229	0.955305
Liaoning	2008	0.22687	0.033174	0.098063	0.940147	0.0794245	0.334066	0.20191	0.865284	0.93524	0.470247	0.790824	0.316504
Liaoning	2009	0.209603	0.0201753	0.144875	0.905379	0.0489439	0.331868	0.20191	0.874785	0.943437	0.504071	0.785232	0.336203
Liaoning	2010	0.366524	0.0785788	0.0359161	0.975149	0.188722	0.345055	0.203418	0.87942	0.954187	0.504071	0.784105	0.57954
Liaoning	2011	0.218815	0.0364281	0.0916061	0.945631	0.0886608	0.349451	0.204759	0.904673	0.96281	0.504071	0.768792	0.731832
Liaoning	2012	0.37311	0.0701181	0.0468119	0.972465	0.169665	0.318681	0.200905	0.913668	0.968033	0.504071	0.761687	0.740109
Liaoning	2013	0.301761	0.0588256	0.0597256	0.966982	0.142686	0.318681	0.200737	0.917389	0.971223	0.552772	0.766328	0.829498
Liaoning	2014	0.131566	0.0164463	0.16586	0.889394	0.0408948	0.334066	0.200235	0.914499	0.9732	0.552772	0.735424	0.8146
Liaoning	2015	0.194877	0.0208848	0.125908	0.910979	0.0515147	0.347253	0.198559	0.911406	0.973484	0.552772	0.738511	0.880814
Liaoning	2016	0.271359	0.0413474	0.0855529	0.955198	0.100468	0.367033	0.189511	0.912998	0.965596	0.552772	0.773198	0.889091
Liaoning	2017	0.161623	0.0219343	0.125908	0.920663	0.0538565	0.382418	0.182306	0.924146	0.968857	0.552772	0.762556	0.884125
Liaoning	2018	0.201238	0.0285832	0.0750605	0.938164	0.069604	0.386813	0.180965	0.931923	0.9719	0.568431	0.754528	0.915577
Liaoning	2019	0.215549	0.0314209	0.106538	0.943414	0.0762133	0.382418	0.180965	0.93705	0.971337	0.568431	0.758626	0.93213
Liaoning	2020	0.239573	0.0515318	0.0552865	0.964765	0.121483	0.386813	0.17929	0.941766	0.970459	0.568431	0.756558	0.965238
Liaoning	2021	0.327238	0.0676849	0.0573043	0.973399	0.158246	0.408791	0.178787	0.955023	0.975059	0.568431	0.760694	0.970204
Liaoning	2022	0.289922	0.0751312	0.0492333	0.976665	0.174288	0.417582	0.17376	0.963651	0.97726	0.568431	0.752421	0.961927
Jilin	2008	0.239643	0.0682067	0.059322	0.966165	0.0768958	0.237363	0.137064	0.559604	0.897668	0.551049	0.904375	0.191525
Jilin	2009	0.229877	0.0608015	0.0702179	0.959281	0.0684167	0.235165	0.148794	0.533248	0.903986	0.563577	0.902269	0.409038
Jilin	2010	0.358539	0.143731	0.0217918	0.982382	0.16537	0.257143	0.163706	0.56752	0.913512	0.563577	0.897131	0.562986
Jilin	2011	0.185215	0.0643546	0.0823245	0.954381	0.0728806	0.208791	0.182473	0.625615	0.923117	0.563577	0.895245	0.711968
Jilin	2012	0.314811	0.0951365	0.0669895	0.969898	0.108947	0.158242	0.180127	0.659391	0.93347	0.563577	0.891599	0.703691
Jilin	2013	0.341929	0.126428	0.0447942	0.977599	0.145588	0.162637	0.182976	0.692139	0.93845	0.586282	0.893567	0.733488
Jilin	2014	0.185872	0.0621676	0.0968523	0.952048	0.0704126	0.167033	0.185489	0.711179	0.941769	0.586282	0.8887	0.831154
Jilin	2015	0.229998	0.0675207	0.0936239	0.955781	0.0767228	0.167033	0.186495	0.754373	0.946514	0.586282	0.88354	0.83612
Jilin	2016	0.313393	0.101439	0.0657789	0.971182	0.116005	0.193407	0.184651	0.784659	0.946258	0.586282	0.916039	0.859295
Jilin	2017	0.210761	0.0818153	0.074657	0.965348	0.0924609	0.2	0.174933	0.821099	0.949539	0.586282	0.88947	0.851018
Jilin	2018	0.283959	0.101047	0.0540759	0.973865	0.114112	0.215385	0.162869	0.839054	0.953237	0.603664	0.897781	0.889091
Jilin	2019	0.264618	0.106963	0.0625504	0.976199	0.120319	0.210989	0.155999	0.869371	0.940391	0.603664	0.896259	0.915577
Jilin	2020	0.317196	0.138776	0.054883	0.979349	0.140302	0.204396	0.159853	0.916684	0.942273	0.603664	0.896546	0.956961
Jilin	2021	0.273295	0.109753	0.0843422	0.974799	0.108624	0.217582	0.147286	0.932743	0.950559	0.603664	0.895971	0.955305
Jilin	2022	0.28083	0.172021	0.0484262	0.985533	0.169955	0.224176	0.137735	0.930324	0.95278	0.603664	0.897122	0.958616
Heilongjiang	2008	0.180013	0.0677846	0.15456	0.92778	0.0416521	0.0945055	0.460288	0.482469	0.766524	0.573129	0.900873	0.21652
Heilongjiang	2009	0.233161	0.148632	0.0661824	0.965465	0.0959713	0.0857143	0.492627	0.456134	0.759175	0.617758	0.901404	0.260056
Heilongjiang	2010	0.203001	0.127625	0.0698144	0.958348	0.0819626	0.0747253	0.507205	0.514431	0.796032	0.617758	0.892617	0.278265
Heilongjiang	2011	0.155331	0.0932309	0.0903955	0.937464	0.0589	0.0879121	0.553117	0.614833	0.818429	0.617758	0.857665	0.288197
Heilongjiang	2012	0.237776	0.125631	0.0770783	0.952981	0.0807146	0.0549451	0.564008	0.711622	0.83048	0.617758	0.844671	0.346135
Heilongjiang	2013	0.277339	0.214019	0.0468119	0.973049	0.140246	0.0593407	0.569705	0.772066	0.837351	0.629815	0.855019	0.592783
Heilongjiang	2014	0.209275	0.141374	0.0645682	0.957765	0.0913111	0.0637363	0.572721	0.792827	0.843929	0.629815	0.858773	0.617613
Heilongjiang	2015	0.210018	0.121832	0.0786925	0.951931	0.0779054	0.0571429	0.557976	0.785231	0.848323	0.629815	0.859916	0.736799
Heilongjiang	2016	0.238312	0.12695	0.0750605	0.954031	0.080953	0.0527473	0.553452	0.802844	0.852609	0.629815	0.871092	0.852673
Heilongjiang	2017	0.185094	0.111706	0.0867635	0.947264	0.0705341	0.0527473	0.55429	0.803238	0.857395	0.629815	0.871325	0.829498
Heilongjiang	2018	0.23164	0.153804	0.0770783	0.963131	0.0982196	0.0571429	0.538874	0.804816	0.86536	0.639524	0.866251	0.846052
Heilongjiang	2019	0.280778	0.232512	0.0488297	0.978882	0.149697	0.0659341	0.482741	0.81223	0.853378	0.639524	0.866491	0.875848
Heilongjiang	2020	0.269734	0.256064	0.0536723	0.977016	0.140274	0.0593407	0.488941	0.809532	0.852524	0.639524	0.86648	0.92882
Heilongjiang	2021	0.25627	0.219771	0.0552865	0.971182	0.117253	0.0637363	0.506367	0.850743	0.860046	0.639524	0.866502	0.942063
Heilongjiang	2022	0.178077	0.17001	0.0730428	0.963715	0.0886514	0.0659341	0.478217	0.894994	0.876547	0.639524	0.866458	0.945373
Shanghai	2008	0.474947	0.00853684	0.0496368	0.625015	0.268605	0.367033	0.163371	0.539977	0.947742	0.00360163	0.777775	0.660983
Shanghai	2009	0.491332	0.00975638	0.0343019	0.651616	0.302736	0.362637	0.17242	0.504442	0.950594	0.101315	0.770695	0.812945
Shanghai	2010	0.515668	0.00651989	0.0359161	0.60238	0.267123	0.364835	0.174263	0.590121	0.957061	0.101315	0.751414	0.71859
Shanghai	2011	0.414453	0.00218111	0.0823245	0.301132	0.147668	0.395604	0.171247	0.640648	0.962913	0.101315	0.788451	0.736799
Shanghai	2012	0.594068	0.00536484	0.0536723	0.603547	0.245607	0.428571	0.157004	0.68425	0.967867	0.101315	0.783004	0.851018
Shanghai	2013	0.345334	0.00381109	0.0564972	0.489441	0.201829	0.415385	0.169068	0.654987	0.968167	0.122142	0.778865	0.781493
Shanghai	2014	0.57528	0.00837853	0.0238095	0.74052	0.343542	0.461538	0.14008	0.731109	0.976288	0.122142	0.780825	0.824532
Shanghai	2015	0.696338	0.0124828	0.0121065	0.813907	0.469671	0.465934	0.136562	0.730547	0.978717	0.122142	0.777666	0.877504
Shanghai	2016	0.712533	0.0117499	0.0129136	0.802357	0.446669	0.483516	0.138237	0.736987	0.981486	0.122142	0.781261	0.900679
Shanghai	2017	0.446083	0.00520067	0.047619	0.643215	0.246346	0.472527	0.138237	0.7726	0.983487	0.122142	0.790847	0.903989
Shanghai	2018	0.458302	0.00633227	0.0383374	0.691051	0.28122	0.476923	0.135891	0.79616	0.985213	0.173818	0.793244	0.915577
Shanghai	2019	0.583214	0.00863065	0.0250202	0.759071	0.352446	0.483516	0.131702	0.801444	0.9887	0.173818	0.788451	0.933786
Shanghai	2020	0.705239	0.0107883	0.0181598	0.808657	0.428865	0.487912	0.126005	0.806418	0.989541	0.173818	0.787405	0.940407
Shanghai	2021	0.657397	0.00965671	0.0221953	0.773772	0.393995	0.468132	0.139913	0.803881	0.990018	0.173818	0.789497	0.943718
Shanghai	2022	0.361961	0.00477852	0.0407587	0.630265	0.239671	0.450549	0.139745	0.811574	0.990562	0.173818	0.785313	0.961927
Jiangsu	2008	0.425981	0.0259271	0.0569007	0.830475	0.166295	0.151648	0.898123	0.539792	0.88281	0.0720326	0.466555	0.732329
Jiangsu	2009	0.410287	0.027434	0.0500404	0.842725	0.176457	0.162637	0.882875	0.606676	0.899455	0.118071	0.452799	0.753352
Jiangsu	2010	0.393332	0.0256398	0.0528652	0.834792	0.1688	0.167033	0.887902	0.670798	0.916967	0.118071	0.416665	0.78977
Jiangsu	2011	0.416562	0.0335786	0.0326877	0.87096	0.218413	0.162637	0.894605	0.714631	0.930423	0.118071	0.376062	0.827843
Jiangsu	2012	0.377275	0.0246314	0.0573043	0.830242	0.164154	0.156044	0.887902	0.734865	0.937879	0.118071	0.370139	0.841086
Jiangsu	2013	0.321327	0.0179238	0.0766747	0.765488	0.123245	0.151648	0.928954	0.715866	0.941014	0.201378	0.374335	0.864261
Jiangsu	2014	0.431218	0.0264079	0.0585149	0.830008	0.175999	0.151648	0.953418	0.710453	0.945467	0.201378	0.366929	0.887436
Jiangsu	2015	0.503379	0.0397878	0.0371267	0.887644	0.25928	0.164835	0.925268	0.726746	0.951449	0.201378	0.344985	0.894057
Jiangsu	2016	0.612804	0.0514028	0.0274415	0.912029	0.331987	0.169231	0.930127	0.730037	0.956366	0.201378	0.350082	0.905645
Jiangsu	2017	0.396806	0.0257043	0.0556901	0.827208	0.173082	0.173626	0.953418	0.757975	0.960226	0.201378	0.39521	0.917232
Jiangsu	2018	0.429715	0.0245493	0.0657789	0.820324	0.166477	0.182418	0.954591	0.76972	0.963533	0.191982	0.427773	0.922198
Jiangsu	2019	0.293517	0.0138137	0.0730428	0.691051	0.0996452	0.182418	1	0.783563	0.964738	0.191982	0.439332	0.930475
Jiangsu	2020	0.549475	0.0345578	0.0407587	0.879944	0.241648	0.2	0.921079	0.799905	0.96907	0.191982	0.443532	0.942063
Jiangsu	2021	0.46952	0.0315382	0.0472155	0.87061	0.222241	0.210989	0.913539	0.82541	0.973714	0.191982	0.435132	0.945373
Jiangsu	2022	0.271739	0.010243	0.153349	0.632598	0.0819205	0.191209	0.987768	0.836691	0.973028	0.191982	0.451932	0.951995
Zhejiang	2008	0.630486	0.0954707	0.0318805	0.973282	0.394627	0.325275	0.32557	0.810003	0.938781	0.805982	0.64011	0.582851
Zhejiang	2009	0.663325	0.102987	0.0282486	0.978066	0.430272	0.373626	0.294068	0.832397	0.948696	0.85296	0.624162	0.645754
Zhejiang	2010	0.811518	0.149911	0.0145278	0.985883	0.649134	0.382418	0.302782	0.848764	0.957296	0.85296	0.561416	0.708658
Zhejiang	2011	0.505021	0.0770309	0.0379338	0.971765	0.343014	0.4	0.295241	0.865298	0.965222	0.85296	0.563814	0.748386
Zhejiang	2012	0.807837	0.151822	0.0145278	0.986816	0.670775	0.417582	0.294571	0.873738	0.96809	0.85296	0.563223	0.788115
Zhejiang	2013	0.598406	0.0964674	0.0282486	0.977949	0.430272	0.426374	0.294906	0.886774	0.971019	0.878954	0.565227	0.817911
Zhejiang	2014	0.758888	0.117581	0.0209847	0.982966	0.524318	0.454945	0.285858	0.901713	0.974219	0.878954	0.566162	0.841086
Zhejiang	2015	0.889279	0.146322	0.0157385	0.987399	0.653116	0.479121	0.274464	0.915214	0.977322	0.878954	0.549212	0.862606
Zhejiang	2016	0.800335	0.13639	0.0161421	0.986816	0.613867	0.518681	0.266086	0.92585	0.980724	0.878954	0.552442	0.894057
Zhejiang	2017	0.647216	0.0903052	0.0302663	0.979466	0.413408	0.531868	0.263405	0.93608	0.983176	0.878954	0.527302	0.912266
Zhejiang	2018	0.593256	0.0861013	0.0379338	0.979349	0.399782	0.553846	0.253854	0.945347	0.985692	0.884591	0.516453	0.925509
Zhejiang	2019	0.735538	0.130697	0.0157385	0.988216	0.613025	0.582418	0.240449	0.953141	0.988602	0.884591	0.502496	0.945373
Zhejiang	2020	0.712031	0.0906922	0.0266344	0.984133	0.474906	0.591209	0.237265	0.961309	0.989425	0.884591	0.572841	0.956961
Zhejiang	2021	0.861901	0.118179	0.0169492	0.988333	0.623888	0.624176	0.241454	0.970091	0.991258	0.884591	0.432151	0.960271
Zhejiang	2022	0.609952	0.0804843	0.0282486	0.981799	0.431674	0.643956	0.2438	0.973249	0.991958	0.884591	0.713531	0.963582
Anhui	2008	0.493216	0.0638797	0.0411622	0.958348	0.230435	0.182418	0.409015	0.0959201	0.804926	0.330254	0.838047	0.645092
Anhui	2009	0.45132	0.06704	0.0403551	0.956364	0.241859	0.173626	0.451743	0.142772	0.811719	0.362042	0.826031	0.716934
Anhui	2010	0.529063	0.0864824	0.0246166	0.965698	0.305975	0.182418	0.453753	0.353443	0.847251	0.362042	0.820586	0.804668
Anhui	2011	0.45393	0.0561813	0.0343019	0.945747	0.19765	0.193407	0.456267	0.524166	0.877197	0.362042	0.756789	0.847707
Anhui	2012	0.453083	0.065709	0.0298628	0.954148	0.23101	0.189011	0.452916	0.54026	0.892331	0.362042	0.744737	0.903989
Anhui	2013	0.447258	0.054094	0.0379338	0.943881	0.192008	0.189011	0.458613	0.589475	0.902083	0.385061	0.731769	0.93213
Anhui	2014	0.542199	0.0723227	0.0310734	0.961965	0.257204	0.213187	0.418566	0.639932	0.918839	0.385061	0.725147	0.93213
Anhui	2015	0.577078	0.0846296	0.0238095	0.965932	0.30303	0.206593	0.446381	0.626027	0.918381	0.385061	0.716091	0.940407
Anhui	2016	0.668009	0.115288	0.00928168	0.975615	0.414936	0.208791	0.449732	0.651643	0.926498	0.385061	0.759621	0.951995
Anhui	2017	0.53774	0.0708804	0.0415658	0.959631	0.259364	0.210989	0.449062	0.685967	0.934322	0.385061	0.767059	0.950339
Anhui	2018	0.494167	0.0748732	0.0367232	0.962898	0.276569	0.217582	0.441521	0.717849	0.942514	0.402599	0.771577	0.956961
Anhui	2019	0.33448	0.0468471	0.0464084	0.94283	0.17656	0.230769	0.427949	0.750421	0.956223	0.402599	0.774321	0.947029
Anhui	2020	0.679607	0.120055	0.0104923	0.978299	0.426832	0.243956	0.412198	0.766607	0.959889	0.402599	0.775997	0.951995
Anhui	2021	0.506888	0.0817332	0.035109	0.966865	0.292621	0.250549	0.417895	0.792338	0.963995	0.402599	0.772645	0.947029
Anhui	2022	0.339872	0.0491865	0.0560936	0.938514	0.178355	0.21978	0.466153	0.810861	0.961669	0.402599	0.779349	0.963582
Fujian	2008	0.68792	0.166187	0.0564972	0.980516	0.488649	0.2	0.294403	0.45366	0.883641	0.939868	0.764377	0.543453
Fujian	2009	0.593342	0.126821	0.0617433	0.973515	0.376037	0.197802	0.300101	0.500033	0.895962	0.942061	0.75381	0.668929
Fujian	2010	0.811587	0.260315	0.0246166	0.988449	0.782363	0.202198	0.301944	0.581967	0.914209	0.942061	0.76198	0.736799
Fujian	2011	0.539987	0.119527	0.0649718	0.971415	0.363683	0.221978	0.3125	0.643831	0.92663	0.942061	0.677364	0.751697
Fujian	2012	0.830738	0.234288	0.031477	0.987399	0.714965	0.268132	0.297922	0.71306	0.938272	0.942061	0.742631	0.756663
Fujian	2013	0.697375	0.17653	0.0564972	0.982032	0.543501	0.287912	0.305798	0.745106	0.94327	0.98669	0.739542	0.784804
Fujian	2014	0.647735	0.185635	0.047619	0.983082	0.57579	0.292308	0.307138	0.770334	0.949077	0.98669	0.737929	0.807979
Fujian	2015	0.847296	0.200334	0.039548	0.985066	0.626492	0.307692	0.299933	0.786509	0.954438	0.98669	0.741971	0.821222
Fujian	2016	0.976615	0.317598	0.0246166	0.9923	1	0.340659	0.279491	0.811937	0.962391	0.98669	0.763597	0.851018
Fujian	2017	0.632732	0.155961	0.0480226	0.981566	0.497567	0.336264	0.28435	0.84165	0.966402	0.98669	0.762221	0.865916
Fujian	2018	0.599772	0.113219	0.0657789	0.974799	0.365403	0.351648	0.275804	0.869734	0.97141	1	0.666535	0.889091
Fujian	2019	0.694488	0.19905	0.0387409	0.987633	0.644614	0.38022	0.260054	0.891511	0.978347	1	0.643369	0.915577
Fujian	2020	0.581606	0.1044	0.0673931	0.974682	0.356723	0.351648	0.269269	0.924509	0.978472	1	0.678899	0.948684
Fujian	2021	0.652626	0.103533	0.0653753	0.974682	0.355957	0.345055	0.268599	0.948831	0.981339	1	0.607838	0.966893
Fujian	2022	0.76295	0.161438	0.0427764	0.986116	0.554373	0.371429	0.243968	0.969096	0.98523	1	0.749961	0.971859
Jiangxi	2008	0.664881	0.178335	0.0484262	0.982616	0.373906	0.175824	0.35506	0.304483	0.763839	0.828688	0.870467	0.192518
Jiangxi	2009	0.597127	0.151892	0.0464084	0.978649	0.320891	0.193407	0.366957	0.441932	0.794847	0.86721	0.861565	0.57954
Jiangxi	2010	0.874795	0.29696	0.0246166	0.99055	0.631367	0.208791	0.364276	0.553388	0.836196	0.86721	0.846772	0.677206
Jiangxi	2011	0.522374	0.132931	0.0609362	0.973282	0.284763	0.193407	0.40315	0.629144	0.855644	0.86721	0.809985	0.748386
Jiangxi	2012	0.908585	0.280502	0.0242131	0.989733	0.603055	0.193407	0.368968	0.668474	0.880732	0.86721	0.802623	0.735143
Jiangxi	2013	0.593809	0.181959	0.0456013	0.981099	0.392897	0.18022	0.406334	0.694802	0.882476	0.893674	0.796144	0.715279
Jiangxi	2014	0.753772	0.208068	0.0363196	0.984249	0.451091	0.189011	0.397118	0.70766	0.895683	0.893674	0.79489	0.726866
Jiangxi	2015	0.942548	0.254616	0.0318805	0.988449	0.554546	0.206593	0.374497	0.710365	0.907786	0.893674	0.778612	0.791425
Jiangxi	2016	0.933716	0.281358	0.0294592	0.989966	0.616134	0.210989	0.373827	0.729043	0.917399	0.893674	0.780943	0.824532
Jiangxi	2017	0.686313	0.207593	0.0306699	0.985299	0.457616	0.213187	0.378184	0.751409	0.923236	0.893674	0.815507	0.918888
Jiangxi	2018	0.613253	0.142318	0.04318	0.977366	0.315908	0.210989	0.382875	0.768034	0.92987	0.911682	0.832181	0.925509
Jiangxi	2019	0.748483	0.255255	0.0330912	0.988449	0.568662	0.208791	0.387064	0.780083	0.93777	0.911682	0.838541	0.918888
Jiangxi	2020	0.744387	0.215731	0.0306699	0.985883	0.466161	0.215385	0.371649	0.820732	0.94267	0.911682	0.841053	0.95365
Jiangxi	2021	0.666212	0.181197	0.0326877	0.982266	0.391691	0.208791	0.380529	0.859898	0.949928	0.911682	0.836028	0.963582
Jiangxi	2022	0.676271	0.19871	0.0326877	0.982616	0.429917	0.193407	0.414712	0.88216	0.949985	0.911682	0.846079	0.955305
Shandong	2008	0.30406	0.0174782	0.159806	0.924746	0.0939847	0.294505	0.331099	0.951609	0.958944	0.164422	0.630815	0.7464
Shandong	2009	0.231243	0.0146463	0.194108	0.912729	0.0807052	0.305495	0.331267	0.954789	0.962883	0.215785	0.600509	0.798047
Shandong	2010	0.25302	0.0159773	0.174738	0.918796	0.0880298	0.314286	0.335456	0.955832	0.96832	0.215785	0.546434	0.847707
Shandong	2011	0.273485	0.0181584	0.16586	0.927546	0.0997294	0.331868	0.338137	0.956185	0.973303	0.215785	0.538853	0.88247
Shandong	2012	0.237344	0.0136027	0.179984	0.908412	0.077452	0.281319	0.334283	0.963134	0.976682	0.215785	0.499889	0.899023
Shandong	2013	0.22044	0.0145701	0.176755	0.915646	0.0827385	0.292308	0.327748	0.964583	0.979703	0.215941	0.483037	0.910611
Shandong	2014	0.159721	0.00587494	0.256255	0.834208	0.0391887	0.298901	0.322051	0.966904	0.982222	0.215941	0.461411	0.917232
Shandong	2015	0.169158	0.0070124	0.257062	0.855326	0.0452652	0.296703	0.319202	0.967543	0.983778	0.215941	0.411864	0.925509
Shandong	2016	0.220872	0.0100085	0.240113	0.889511	0.0610408	0.307692	0.321213	0.967148	0.985334	0.215941	0.468853	0.93213
Shandong	2017	0.193408	0.0102137	0.208636	0.894411	0.0626487	0.318681	0.313673	0.971731	0.987091	0.215941	0.477249	0.945373
Shandong	2018	0.225885	0.0170326	0.169492	0.930463	0.0984206	0.327473	0.319035	0.966213	0.987781	0.228155	0.616841	0.951995
Shandong	2019	0.153758	0.00833749	0.203793	0.86816	0.0534124	0.320879	0.340147	0.967445	0.985171	0.228155	0.61404	0.961927
Shandong	2020	0.28147	0.0186685	0.155367	0.933613	0.108148	0.327473	0.335456	0.967937	0.986028	0.228155	0.611787	0.966893
Shandong	2021	0.359991	0.0272463	0.121065	0.956131	0.153735	0.378022	0.314678	0.974066	0.98948	0.228155	0.616293	0.968548
Shandong	2022	0.229618	0.0263082	0.11703	0.953098	0.148748	0.373626	0.32624	0.97555	0.989793	0.228155	0.60728	0.970204
Henan	2008	0.306825	0.0201284	0.142857	0.93128	0.0980139	0.292308	0.343834	0.809863	0.923486	0.207485	0.684973	0.624069
Henan	2009	0.285376	0.0173375	0.169088	0.919846	0.086118	0.292308	0.354223	0.810376	0.925918	0.269652	0.657972	0.728522
Henan	2010	0.285169	0.0301545	0.100081	0.953798	0.143803	0.30989	0.338975	0.833029	0.94116	0.269652	0.631067	0.78977
Henan	2011	0.273623	0.0174196	0.174334	0.921363	0.0858936	0.314286	0.346515	0.853253	0.949345	0.269652	0.609165	0.812945
Henan	2012	0.200875	0.0135264	0.184019	0.897912	0.068398	0.250549	0.362433	0.852282	0.952338	0.269652	0.58206	0.793081
Henan	2013	0.199647	0.0102313	0.216707	0.871077	0.0537303	0.261538	0.365784	0.862132	0.956223	0.290636	0.572349	0.842741
Henan	2014	0.242443	0.0145877	0.175948	0.916579	0.0734088	0.307692	0.313338	0.88735	0.966237	0.290636	0.561183	0.870882
Henan	2015	0.257756	0.0147636	0.181598	0.912262	0.0744745	0.305495	0.335958	0.892541	0.966031	0.290636	0.549577	0.889091
Henan	2016	0.289507	0.0177597	0.16586	0.924046	0.0884972	0.32967	0.344001	0.903375	0.968701	0.290636	0.583816	0.927164
Henan	2017	0.303127	0.0229427	0.13519	0.93828	0.112509	0.334066	0.35439	0.910049	0.971225	0.290636	0.576134	0.943718
Henan	2018	0.292082	0.0177479	0.161421	0.922296	0.0891936	0.336264	0.355731	0.914827	0.973681	0.331976	0.565726	0.950339
Henan	2019	0.171163	0.00722934	0.223164	0.838292	0.0412781	0.340659	0.361092	0.928426	0.977032	0.331976	0.555096	0.956961
Henan	2020	0.309453	0.0211076	0.121872	0.93513	0.108451	0.356044	0.35992	0.943913	0.977512	0.331976	0.544242	0.966893
Henan	2021	0.422317	0.0377239	0.0887813	0.965115	0.186988	0.4	0.336126	0.962422	0.981043	0.331976	0.565951	0.981791
Henan	2022	0.182657	0.0117616	0.165456	0.896161	0.063892	0.375824	0.344672	0.972988	0.981503	0.331976	0.522532	0.986757
Hubei	2008	0.523947	0.103216	0.0484262	0.972232	0.261827	0.206593	0.41622	0.248106	0.846066	0.37316	0.739786	0.444794
Hubei	2009	0.452581	0.0816159	0.0669895	0.963015	0.207807	0.197802	0.434149	0.341422	0.860703	0.441591	0.732288	0.586161
Hubei	2010	0.553278	0.126915	0.0355125	0.976315	0.322629	0.204396	0.445208	0.410919	0.885371	0.441591	0.726844	0.680516
Hubei	2011	0.427018	0.0742986	0.0726392	0.957065	0.19025	0.206593	0.459786	0.52493	0.904998	0.441591	0.702543	0.771561
Hubei	2012	0.477436	0.0796869	0.0686037	0.959865	0.204853	0.182418	0.464142	0.581995	0.916152	0.441591	0.705662	0.781493
Hubei	2013	0.461534	0.076984	0.066586	0.959748	0.198692	0.252747	0.451575	0.701032	0.927044	0.555277	0.701464	0.855984
Hubei	2014	0.564806	0.0892615	0.0625504	0.966048	0.230856	0.265934	0.44571	0.734624	0.935764	0.555277	0.693131	0.864261
Hubei	2015	0.554142	0.0990296	0.0492333	0.968148	0.257087	0.314286	0.467493	0.737496	0.938005	0.555277	0.679971	0.88578
Hubei	2016	0.613582	0.146621	0.0225989	0.980866	0.382011	0.364835	0.435154	0.76076	0.948499	0.555277	0.722452	0.912266
Hubei	2017	0.565861	0.121193	0.0411622	0.975732	0.317478	0.358242	0.449062	0.788216	0.951523	0.555277	0.724732	0.905645
Hubei	2018	0.497209	0.0819853	0.0597256	0.962431	0.216015	0.358242	0.460121	0.810942	0.955823	0.574225	0.728097	0.918888
Hubei	2019	0.401231	0.0577175	0.0811138	0.945164	0.153011	0.351648	0.470677	0.813497	0.96203	0.574225	0.659047	1
Hubei	2020	0.718167	0.173246	0.0258273	0.984249	0.448483	0.351648	0.42996	0.810788	0.963356	0.574225	0.680709	0.945373
Hubei	2021	0.5413	0.117393	0.0488297	0.969782	0.301937	0.294505	0.525804	0.830115	0.961339	0.574225	0.637384	0.958616
Hubei	2022	0.348601	0.0686992	0.0839387	0.945164	0.179037	0.276923	0.55429	0.842509	0.96234	0.574225	0.724035	0.955305
Hunan	2008	0.580327	0.144288	0.0355125	0.979232	0.387293	0.261538	0.504859	0.320127	0.811737	0.590197	0.749092	0.201291
Hunan	2009	0.539762	0.125396	0.039548	0.975965	0.338265	0.27033	0.502681	0.378033	0.840779	0.65487	0.738256	0.319649
Hunan	2010	0.780735	0.169259	0.0294592	0.982849	0.462641	0.27033	0.50754	0.48633	0.870331	0.65487	0.729726	0.581195
Hunan	2011	0.433984	0.0973293	0.0383374	0.968965	0.271026	0.259341	0.509718	0.573562	0.895019	0.65487	0.718068	0.710313
Hunan	2012	0.766113	0.173188	0.0230024	0.983549	0.482867	0.226374	0.513572	0.609866	0.906821	0.65487	0.690396	0.759974
Hunan	2013	0.590179	0.136126	0.0359161	0.978299	0.382871	0.21978	0.519772	0.657437	0.915352	0.702004	0.687114	0.803013
Hunan	2014	0.755311	0.154097	0.0355125	0.981216	0.436297	0.232967	0.519605	0.705919	0.923921	0.702004	0.684137	0.831154
Hunan	2015	0.79719	0.163419	0.0290557	0.982732	0.465764	0.237363	0.516253	0.715353	0.92971	0.702004	0.679619	0.874193
Hunan	2016	0.823703	0.186286	0.0254237	0.985299	0.533909	0.246154	0.516253	0.72165	0.936154	0.702004	0.696341	0.900679
Hunan	2017	0.690219	0.160863	0.0302663	0.982849	0.464067	0.254945	0.510389	0.736097	0.941724	0.702004	0.694373	0.920543
Hunan	2018	0.629362	0.111407	0.0383374	0.973515	0.324111	0.254945	0.527312	0.714763	0.944345	0.73207	0.668122	0.92882
Hunan	2019	0.680765	0.17504	0.0290557	0.984249	0.509753	0.263736	0.52061	0.752177	0.950218	0.73207	0.655827	0.947029
Hunan	2020	0.82633	0.183988	0.0270379	0.985999	0.514815	0.276923	0.473861	0.853134	0.957432	0.73207	0.658257	0.958616
Hunan	2021	0.650397	0.155223	0.0367232	0.981799	0.434133	0.285714	0.502849	0.861099	0.959467	0.73207	0.653398	0.971859
Hunan	2022	0.566759	0.146246	0.0379338	0.979816	0.407887	0.261538	0.517259	0.887982	0.960798	0.73207	0.663116	0.965238
Guangdong	2008	0.797933	0.133206	0.0310734	0.978416	0.567783	0.384615	0.735925	0.74047	0.919662	0.681961	0.283877	0.436021
Guangdong	2009	0.604922	0.0956055	0.0403551	0.969315	0.413599	0.384615	0.739109	0.754142	0.927662	0.728155	0.272984	0.523258
Guangdong	2010	0.864373	0.110897	0.0347054	0.975382	0.513712	0.397802	0.748492	0.78986	0.938027	0.728155	0.234204	0.76494
Guangdong	2011	0.573967	0.0793234	0.0375303	0.965932	0.376579	0.417582	0.740449	0.825738	0.947888	0.728155	0.166013	0.649065
Guangdong	2012	0.858669	0.109589	0.035109	0.976782	0.520915	0.421978	0.718331	0.850104	0.9534	0.728155	0.108279	0.801357
Guangdong	2013	0.858686	0.121914	0.0330912	0.979932	0.582446	0.426374	0.705261	0.862575	0.958592	0.756655	0.0822437	0.865916
Guangdong	2014	0.661735	0.0912609	0.0371267	0.972699	0.440817	0.432967	0.704088	0.877933	0.962646	0.756655	0.0358387	0.855984
Guangdong	2015	0.812918	0.102049	0.0347054	0.976082	0.496712	0.443956	0.705094	0.890984	0.9656	0.756655	0.028867	0.890747
Guangdong	2016	1	0.128914	0.0318805	0.982149	0.633246	0.461538	0.691521	0.899738	0.970337	0.756655	0	0.895713
Guangdong	2017	0.67634	0.0914661	0.0379338	0.974449	0.458547	0.468132	0.689008	0.910708	0.974012	0.756655	0.061002	0.903989
Guangdong	2018	0.728054	0.0956583	0.0363196	0.976899	0.486751	0.49011	0.667895	0.92423	0.977407	0.792045	0.214705	0.908955
Guangdong	2019	0.773476	0.103017	0.0375303	0.979582	0.531754	0.507692	0.653485	0.932017	0.980747	0.792045	0.191285	0.940407
Guangdong	2020	0.606253	0.0728797	0.0371267	0.973749	0.416796	0.540659	0.641421	0.945068	0.981901	0.792045	0.134041	0.956961
Guangdong	2021	0.589263	0.0535428	0.0379338	0.963948	0.311561	0.593407	0.644605	0.956401	0.984485	0.792045	0.248529	0.968548
Guangdong	2022	0.784486	0.0998505	0.0375303	0.981682	0.572154	0.595604	0.635724	0.962279	0.985568	0.792045	0.0195532	0.970204
Guangxi	2008	0.765301	0.276228	0.0274415	0.986933	0.457953	0.30989	0.482239	0.152133	0.716175	0.602412	0.645967	0.406886
Guangxi	2009	0.619268	0.176917	0.00807103	0.978999	0.295739	0.307692	0.471012	0.175463	0.743954	0.779361	0.688451	0.554709
Guangxi	2010	0.904091	0.222861	0.0169492	0.983549	0.364693	0.294505	0.467996	0.346333	0.794884	0.779361	0.680826	0.720245
Guangxi	2011	0.550979	0.16801	0.0193705	0.976665	0.268446	0.287912	0.468331	0.445614	0.833597	0.779361	0.779476	0.400761
Guangxi	2012	0.868382	0.259394	0.0516546	0.985883	0.418306	0.221978	0.470342	0.523056	0.850406	0.779361	0.75427	0.793081
Guangxi	2013	0.862782	0.253578	0.0318805	0.985299	0.412188	0.228571	0.479055	0.474846	0.862563	0.838866	0.776356	0.759974
Guangxi	2014	0.795012	0.243405	0.019774	0.984716	0.398693	0.235165	0.47805	0.52367	0.874699	0.838866	0.782891	0.788115
Guangxi	2015	0.974886	0.295776	0.0157385	0.988449	0.488663	0.248352	0.464142	0.550609	0.886877	0.838866	0.78206	0.829498
Guangxi	2016	0.869108	0.262132	0.0363196	0.987283	0.436839	0.257143	0.449564	0.612822	0.899952	0.838866	0.811341	0.864261
Guangxi	2017	0.860121	0.284964	0.0137207	0.988916	0.479394	0.265934	0.440013	0.673311	0.9032	0.838866	0.805941	0.895713
Guangxi	2018	0.775965	0.215801	0.0355125	0.984483	0.366198	0.268132	0.444873	0.690725	0.911524	0.896179	0.810695	0.912266
Guangxi	2019	0.881622	0.246654	0.023406	0.987049	0.421901	0.274725	0.4375	0.690393	0.916869	0.896179	0.80749	0.95365
Guangxi	2020	0.8082	0.244924	0.023406	0.988449	0.423873	0.254945	0.400134	0.782233	0.927343	0.896179	0.809664	0.97848
Guangxi	2021	0.693365	0.176676	0.0298628	0.982499	0.307303	0.250549	0.412534	0.818544	0.933599	0.896179	0.805317	0.980136
Guangxi	2022	0.755898	0.253777	0.0181598	0.988799	0.442916	0.257143	0.404993	0.852436	0.939069	0.896179	0.81401	0.97517
Hainan	2008	0.660819	0.286219	0.0326877	0.989733	0.571953	0.250549	0.0412198	0.453593	0.790691	0.71923	0.982568	0.394637
Hainan	2009	0.724355	0.325074	0.0274415	0.99195	0.656888	0.272527	0.0371984	0.550033	0.825862	0.76793	0.980389	0.306406
Hainan	2010	0.693728	0.321703	0.0270379	0.99195	0.65565	0.276923	0.0370308	0.634802	0.862077	0.76793	0.981478	0.248469
Hainan	2011	0.835543	0.322107	0.031477	0.992066	0.661576	0.287912	0.0371984	0.707071	0.888032	0.76793	0.982867	0.549743
Hainan	2012	0.734501	0.239155	0.0407587	0.988333	0.496394	0.276923	0.0385389	0.739071	0.899955	0.76793	0.981366	0.586161
Hainan	2013	0.797051	0.327454	0.0343019	0.992766	0.686397	0.307692	0.0350201	0.716023	0.914284	0.821171	0.982398	0.581195
Hainan	2014	0.711202	0.247082	0.0399516	0.989149	0.522869	0.323077	0.0380362	0.736226	0.920159	0.821171	0.978917	0.521602
Hainan	2015	0.560105	0.125062	0.0411622	0.975849	0.267371	0.340659	0.0393767	0.789772	0.923417	0.821171	0.979165	0.567952
Hainan	2016	0.827523	0.311225	0.0355125	0.992066	0.669574	0.36044	0.0380362	0.792121	0.931922	0.821171	0.973747	0.614302
Hainan	2017	0.650552	0.241201	0.0399516	0.988916	0.52342	0.36044	0.0390416	0.81817	0.937856	0.821171	0.973765	0.776527
Hainan	2018	0.812296	0.260549	0.0326877	0.9902	0.570574	0.375824	0.0382038	0.842457	0.943796	0.852177	0.9729	0.816256
Hainan	2019	0.543754	0.154414	0.054883	0.981332	0.341967	0.358242	0.040382	0.852917	0.94778	0.852177	0.97354	0.890747
Hainan	2020	0.57955	0.150972	0.0524617	0.983316	0.357546	0.356044	0.0363606	0.922447	0.953062	0.852177	0.973068	0.973514
Hainan	2021	0.57115	0.19409	0.0480226	0.987399	0.465095	0.371429	0.0380362	0.940837	0.9598	0.852177	0.974012	0.988413
Hainan	2022	0.623987	0.205365	0.0496368	0.988216	0.495707	0.395604	0.0390416	0.951731	0.961556	0.852177	0.972125	0.981791
Chongqing	2008	0.585737	0.116584	0	0.985999	0.321339	0.417582	0.101374	0.282762	0.897392	0.30238	0.863709	0.733488
Chongqing	2009	0.535631	0.090786	0.0108959	0.980982	0.252703	0.424176	0.105563	0.343949	0.918761	0.499687	0.861578	0.803013
Chongqing	2010	0.566915	0.0917534	0.0217918	0.981099	0.257466	0.428571	0.107406	0.454689	0.93327	0.499687	0.882227	0.857639
Chongqing	2011	0.492438	0.100929	0.0153349	0.983082	0.285997	0.43956	0.108076	0.607925	0.94825	0.499687	0.878592	0.905645
Chongqing	2012	0.560209	0.0923221	0.0209847	0.982499	0.264613	0.41978	0.101542	0.695915	0.957677	0.499687	0.877524	0.831154
Chongqing	2013	0.520767	0.090997	0.0201776	0.982149	0.26314	0.430769	0.103217	0.721105	0.961952	0.555747	0.866516	0.895713
Chongqing	2014	0.698844	0.123362	0.0149314	0.988216	0.358607	0.476923	0.0975201	0.777828	0.968564	0.555747	0.862936	0.879159
Chongqing	2015	0.573172	0.0860016	0.0294592	0.982616	0.252871	0.501099	0.0950067	0.814582	0.972711	0.555747	0.858604	0.908955
Chongqing	2016	0.626095	0.11391	0.0133172	0.987866	0.337222	0.52967	0.0924933	0.834642	0.977127	0.555747	0.801674	0.942063
Chongqing	2017	0.598389	0.1226	0.00968523	0.989033	0.366268	0.538462	0.0923257	0.845301	0.979704	0.555747	0.803182	0.920543
Chongqing	2018	0.595157	0.0964674	0.0181598	0.985649	0.291448	0.567033	0.0919906	0.854331	0.981002	0.629032	0.800451	0.915577
Chongqing	2019	0.552345	0.0907742	0.0181598	0.984833	0.27664	0.584615	0.0908177	0.866677	0.984698	0.629032	0.79867	0.948684
Chongqing	2020	0.755673	0.137539	0.00605327	0.992183	0.429118	0.659341	0.0800938	0.930998	0.987632	0.629032	0.797513	0.965238
Chongqing	2021	0.680816	0.134074	0.00766747	0.9916	0.419989	0.641758	0.083445	0.931539	0.989101	0.629032	0.799827	0.976825
Chongqing	2022	0.412845	0.0651227	0.0274415	0.981332	0.205961	0.672527	0.0779155	0.941455	0.990598	0.629032	0.795199	0.968548
Sichuan	2008	0.530083	0.176471	0.035109	0.993116	0.232431	0.320879	0.310489	0.6064	0.895017	0.427967	0.736008	0.421619
Sichuan	2009	0.524345	0.164498	0.0387409	0.9916	0.217338	0.312088	0.337131	0.633887	0.900428	0.491231	0.734317	0.457044
Sichuan	2010	0.536789	0.183026	0.031477	0.992416	0.240606	0.318681	0.348525	0.704205	0.916492	0.491231	0.742814	0.577884
Sichuan	2011	0.471542	0.160124	0.0423729	0.990666	0.208461	0.316484	0.353887	0.749769	0.931904	0.491231	0.716935	0.635822
Sichuan	2012	0.537221	0.207282	0.0242131	0.992883	0.27096	0.338462	0.374665	0.813448	0.937305	0.491231	0.71279	0.723556
Sichuan	2013	0.516809	0.175955	0.0375303	0.991366	0.230556	0.318681	0.368968	0.818984	0.944462	0.505481	0.686656	0.716934
Sichuan	2014	0.518624	0.18156	0.0338983	0.99195	0.238923	0.349451	0.359584	0.870614	0.950723	0.505481	0.660917	0.753352
Sichuan	2015	0.501357	0.156272	0.0443906	0.988799	0.206643	0.356044	0.407507	0.836247	0.947147	0.505481	0.649663	0.804668
Sichuan	2016	0.498851	0.163666	0.0403551	0.989499	0.21817	0.364835	0.410523	0.835888	0.951969	0.505481	0.637442	0.824532
Sichuan	2017	0.488083	0.171616	0.0375303	0.990083	0.230248	0.371429	0.412366	0.859521	0.95773	0.505481	0.626972	0.854329
Sichuan	2018	0.542959	0.204995	0.0250202	0.992533	0.276724	0.417582	0.396783	0.896359	0.963694	0.549483	0.604024	0.889091
Sichuan	2019	0.523791	0.189792	0.0286521	0.992066	0.257223	0.426374	0.385556	0.915902	0.970105	0.549483	0.589028	0.917232
Sichuan	2020	0.615898	0.223975	0.0193705	0.994283	0.303974	0.452747	0.359584	0.955169	0.973729	0.549483	0.573779	0.943718
Sichuan	2021	0.57452	0.201782	0.0246166	0.993	0.274031	0.468132	0.371984	0.967431	0.975998	0.549483	0.604278	0.935441
Sichuan	2022	0.414954	0.151658	0.0383374	0.989499	0.205563	0.461538	0.384216	0.970667	0.976691	0.549483	0.543281	0.93213
Guizhou	2008	0.658503	0.174008	0.0318805	0.992416	0.307728	0.303297	0.133378	0.038946	0.801236	0.327122	0.96089	0.00529714
Guizhou	2009	0.556182	0.137539	0.0488297	0.989966	0.244294	0.281319	0.130865	0.0986984	0.834192	0.448951	0.957295	0.269988
Guizhou	2010	0.675528	0.156835	0.0443906	0.990433	0.257083	0.314286	0.13254	0.210119	0.858541	0.448951	0.955552	0.776527
Guizhou	2011	0.438581	0.102618	0.0778854	0.984949	0.166211	0.296703	0.123324	0.428546	0.893544	0.448951	0.936925	0.841086
Guizhou	2012	0.684377	0.161232	0.04318	0.990783	0.261892	0.241758	0.131535	0.382424	0.907699	0.448951	0.92211	0.852673
Guizhou	2013	0.557841	0.124435	0.0633575	0.988683	0.20289	0.338462	0.11679	0.644369	0.929318	0.534764	0.920367	0.895713
Guizhou	2014	0.690323	0.199889	0.0363196	0.993583	0.327635	0.338462	0.122319	0.675974	0.937412	0.534764	0.900977	0.908955
Guizhou	2015	0.732323	0.189194	0.0371267	0.992883	0.311304	0.338462	0.126005	0.737887	0.944132	0.534764	0.898908	0.915577
Guizhou	2016	0.699224	0.17341	0.0334948	0.991833	0.287217	0.336264	0.130697	0.760205	0.949279	0.534764	0.912089	0.905645
Guizhou	2017	0.646335	0.169769	0.0383374	0.991366	0.283202	0.356044	0.136059	0.789856	0.955141	0.534764	0.893243	0.908955
Guizhou	2018	0.653058	0.1568	0.0423729	0.990083	0.263187	0.358242	0.141588	0.805217	0.958031	0.639367	0.881914	0.947029
Guizhou	2019	0.686555	0.1783	0.0347054	0.991483	0.301212	0.362637	0.143767	0.817553	0.963178	0.639367	0.862742	0.942063
Guizhou	2020	0.781081	0.199132	0.0238095	0.994866	0.359392	0.395604	0.113606	0.876499	0.972523	0.639367	0.850075	0.951995
Guizhou	2021	0.668303	0.16295	0.0359161	0.991716	0.294173	0.378022	0.137064	0.882935	0.970774	0.639367	0.875409	0.970204
Guizhou	2022	0.503379	0.135763	0.0472155	0.990433	0.244958	0.41978	0.123995	0.944481	0.974393	0.639367	0.824741	0.976825
Yunnan	2008	0.733429	0.296626	0.0778854	0.9951	0.26867	0.276923	0.219169	0.647754	0.826143	0.59239	0.930428	0.557855
Yunnan	2009	0.565982	0.199807	0.0875706	0.991483	0.181126	0.296703	0.218331	0.65017	0.840412	0.697776	0.926369	0.751697
Yunnan	2010	0.644036	0.245153	0.0807103	0.993933	0.224405	0.296703	0.209786	0.683646	0.869387	0.697776	0.921574	0.88578
Yunnan	2011	0.53608	0.184961	0.0875706	0.99125	0.169693	0.320879	0.208613	0.729339	0.895638	0.697776	0.861083	0.905645
Yunnan	2012	0.610332	0.210255	0.0774818	0.9923	0.194555	0.232967	0.216991	0.743612	0.907607	0.697776	0.854017	0.9073
Yunnan	2013	0.574693	0.211093	0.0738499	0.992533	0.196561	0.257143	0.213472	0.790146	0.920713	0.737394	0.851214	0.864261
Yunnan	2014	0.585063	0.21233	0.0686037	0.99265	0.198921	0.243956	0.212969	0.806184	0.928187	0.737394	0.850167	0.847707
Yunnan	2015	0.638488	0.229099	0.0694108	0.993466	0.21616	0.252747	0.214142	0.817888	0.932466	0.737394	0.832967	0.846052
Yunnan	2016	0.639041	0.254452	0.0734463	0.9944	0.241905	0.263736	0.21431	0.836198	0.93827	0.737394	0.824519	0.867572
Yunnan	2017	0.675545	0.266805	0.0778854	0.994516	0.255395	0.261538	0.225034	0.828523	0.942258	0.737394	0.820137	0.897368
Yunnan	2018	0.66832	0.265627	0.0794996	0.994516	0.255858	0.29011	0.223525	0.867144	0.947998	0.815847	0.810271	0.927164
Yunnan	2019	0.520196	0.18261	0.0843422	0.991016	0.17605	0.285714	0.222185	0.881944	0.961677	0.815847	0.80698	0.923854
Yunnan	2020	0.616468	0.220551	0.0770783	0.99265	0.207536	0.30989	0.224028	0.913155	0.963746	0.815847	0.896902	0.955305
Yunnan	2021	0.580811	0.19827	0.0786925	0.99125	0.185777	0.334066	0.231233	0.932789	0.966813	0.815847	0.80698	0.963582
Yunnan	2022	0.549527	0.214764	0.0778854	0.991833	0.200847	0.327473	0.236428	0.945155	0.968568	0.815847	0.896902	0.97848
Shanxi	2008	0.236531	0.0444256	0.0811138	0.970015	0.0681736	0.316484	0.105898	0.872153	0.922678	0.463671	0.908135	0.278431
Shanxi	2009	0.310766	0.0617807	0.066586	0.979232	0.095588	0.342857	0.103887	0.897235	0.937184	0.537426	0.899603	0.438835
Shanxi	2010	0.319201	0.0767143	0.0520581	0.983666	0.117767	0.345055	0.102379	0.917511	0.951148	0.537426	0.89205	0.567952
Shanxi	2011	0.364156	0.0917417	0.0480226	0.985883	0.141381	0.362637	0.109752	0.93282	0.959346	0.537426	0.889088	0.730177
Shanxi	2012	0.29407	0.0580458	0.0726392	0.976549	0.0892544	0.325275	0.110087	0.945016	0.965581	0.537426	0.881535	0.804668
Shanxi	2013	0.287796	0.0521474	0.0734463	0.973399	0.0803079	0.327473	0.112098	0.949075	0.969133	0.602568	0.877808	0.812945
Shanxi	2014	0.291823	0.051649	0.0807103	0.973049	0.0797751	0.331868	0.113103	0.952352	0.972375	0.602568	0.862976	0.855984
Shanxi	2015	0.266035	0.0486177	0.0843422	0.970832	0.0753392	0.345055	0.115449	0.9466	0.972481	0.602568	0.838644	0.855984
Shanxi	2016	0.248267	0.0388145	0.098063	0.963832	0.0602508	0.353846	0.114779	0.950209	0.975032	0.602568	0.84034	0.852673
Shanxi	2017	0.311423	0.0658204	0.0653753	0.978649	0.103534	0.358242	0.118465	0.955752	0.977944	0.602568	0.830112	0.869227
Shanxi	2018	0.281176	0.0535253	0.0742534	0.973399	0.0845989	0.364835	0.119638	0.960687	0.980714	0.628249	0.818297	0.88247
Shanxi	2019	0.295211	0.0719944	0.0516546	0.980982	0.114794	0.384615	0.117795	0.96177	0.967092	0.628249	0.801042	0.920543
Shanxi	2020	0.3243	0.0592477	0.0794996	0.977599	0.0963452	0.415385	0.114444	0.972848	0.983223	0.628249	0.832794	0.942063
Shanxi	2021	0.430562	0.123356	0.0330912	0.9902	0.201843	0.441758	0.116454	0.983403	0.985774	0.628249	0.769289	0.947029
Shanxi	2022	0.258361	0.0511858	0.0924132	0.972582	0.083234	0.424176	0.121649	0.988223	0.987014	0.628249	0.8963	0.947029
Gansu	2008	0.0814595	0.038879	0.184423	0.92673	0.0133917	0.120879	0.167393	0.634418	0.748166	0.0582524	0.970074	0.332395
Gansu	2009	0.0869731	0.0435285	0.176755	0.93548	0.0156073	0.153846	0.164712	0.639733	0.767459	0.117131	0.968112	0.354412
Gansu	2010	0.110877	0.0463076	0.171106	0.936764	0.0162429	0.151648	0.166723	0.720065	0.808027	0.117131	0.965965	0.375931
Gansu	2011	0.110894	0.0523878	0.153753	0.943647	0.0190241	0.145055	0.168566	0.738537	0.842113	0.117131	0.957261	0.478563
Gansu	2012	0.0987089	0.0578406	0.148507	0.949014	0.0215762	0.123077	0.168901	0.756306	0.860195	0.117131	0.95336	0.587817
Gansu	2013	0.111983	0.0580692	0.146893	0.949831	0.0217726	0.0989011	0.167058	0.814289	0.875789	0.130598	0.951011	0.685483
Gansu	2014	0.102805	0.0419278	0.167474	0.931863	0.0145135	0.105495	0.164712	0.828205	0.888034	0.130598	0.949917	0.746731
Gansu	2015	0.0978274	0.0341884	0.18523	0.918446	0.0110546	0.107692	0.162366	0.817081	0.888608	0.130598	0.948721	0.822877
Gansu	2016	0.0938521	0.0348568	0.198547	0.920779	0.0114238	0.10989	0.161025	0.822223	0.896065	0.130598	0.949534	0.892402
Gansu	2017	0.102148	0.0504588	0.163438	0.946097	0.0186829	0.120879	0.157172	0.836718	0.901975	0.130598	0.951507	0.910611
Gansu	2018	0.118395	0.0712204	0.138822	0.963482	0.0284006	0.136264	0.150804	0.873874	0.915029	0.131381	0.945477	0.935441
Gansu	2019	0.12142	0.0692797	0.122276	0.963365	0.0276387	0.147253	0.14695	0.885476	0.921753	0.131381	0.943356	0.947029
Gansu	2020	0.119985	0.0924511	0.0948345	0.971415	0.0360944	0.142857	0.146783	0.920851	0.92463	0.131381	0.941704	0.948684
Gansu	2021	0.105242	0.0625077	0.111784	0.956715	0.0228102	0.149451	0.147118	0.936363	0.934297	0.131381	0.945008	0.950339
Gansu	2022	0.0649878	0.0513266	0.13519	0.945747	0.0178696	0.156044	0.15181	0.949228	0.938792	0.131381	0.9384	0.958616
Qinghai	2008	0.149386	0.694708	0.121469	0.996733	0.0368096	0.167033	0.0202748	0	0.766281	0.0228625	1	0
Qinghai	2009	0.187393	0.941731	0.115012	0.999067	0.0521971	0.215385	0.0108914	0.633796	0.827646	0.0255246	0.997632	0.107764
Qinghai	2010	0.152237	0.772367	0.123487	0.9979	0.0421989	0.206593	0.0142426	0.66381	0.853342	0.0255246	0.997155	0.0597583
Qinghai	2011	0.145307	0.756642	0.120662	0.997783	0.0416801	0.217582	0.0149129	0.722289	0.881067	0.0255246	0.99859	0.349445
Qinghai	2012	0.161536	0.916731	0.118644	0.999183	0.0522018	0.131868	0.00854558	0.827786	0.909312	0.0255246	0.997824	0.339513
Qinghai	2013	0.132205	0.65461	0.119855	0.997667	0.0360009	0.136264	0.00988606	0.814739	0.91635	0.0421234	0.997869	0.359378
Qinghai	2014	0.158339	0.79878	0.115819	0.99895	0.0456252	0.164835	0.00670241	0.850331	0.9298	0.0421234	0.996727	0.319649
Qinghai	2015	0.139447	0.586655	0.125504	0.99755	0.0323457	0.169231	0.00754021	0.820362	0.932018	0.0421234	0.996007	0.332892
Qinghai	2016	0.149178	0.605324	0.124294	0.997783	0.0338648	0.189011	0.00686997	0.864467	0.93756	0.0421234	0.992072	0.627545
Qinghai	2017	0.165736	0.77025	0.121065	0.99895	0.045097	0.202198	0.00586461	0.888652	0.940468	0.0421234	0.992246	0.652375
Qinghai	2018	0.181879	0.936144	0.116223	0.99965	0.0565348	0.208791	0.00636729	0.904146	0.945302	0.0450987	0.991586	0.791425
Qinghai	2019	0.171958	0.887139	0.119451	0.999533	0.0537677	0.224176	0.00653485	0.897469	0.947152	0.0450987	0.990913	0.913922
Qinghai	2020	0.173773	1	0.112591	1	0.0597787	0.226374	0.00335121	0.910635	0.952184	0.0450987	0.990229	0.917232
Qinghai	2021	0.159739	0.82897	0.111784	0.999417	0.0487616	0.215385	0.00368633	0.927354	0.957307	0.0450987	0.991598	0.923854
Qinghai	2022	0.134245	0.712673	0.116223	0.998833	0.0411987	0.215385	0.00368633	0.941002	0.960894	0.0450987	0.988861	0.927164
Ningxia	2008	0.0599236	0.00574008	0.956013	0.0618364	0.000565582	0.0043956	0.0869638	0.774648	0.446267	0.0491701	0.980446	0.532528
Ningxia	2009	0.0526298	0.00490164	1	0	0	0.00879121	0.0836126	0.749989	0.648301	0.108049	0.976754	0.0382387
Ningxia	2010	0.0929706	0.00564627	0.927764	0.0945047	0.000635695	0.010989	0.0839477	0.776987	0.7188	0.108049	0.977499	0.630856
Ningxia	2011	0.0818916	0.00503064	0.928975	0.0269513	0.000280454	0.0131868	0.0859584	0.802642	0.77142	0.108049	0.978829	0.667274
Ningxia	2012	0.084536	0.00680719	0.745359	0.253063	0.00169207	0.00659341	0.0789209	0.803123	0.807463	0.108049	0.979356	0.88578
Ningxia	2013	0.106003	0.0072352	0.720743	0.264847	0.00211275	0.0043956	0.083445	0.81016	0.817756	0.14015	0.979813	0.902334
Ningxia	2014	0.127694	0.00592771	0.789346	0.19076	0.0011966	0.00879121	0.080429	0.818282	0.834971	0.14015	0.981176	0.869227
Ningxia	2015	0.0926076	0.00507168	0.855125	0.110022	0.000565582	0.0131868	0.0805965	0.840799	0.844144	0.14015	0.986898	0.880814
Ningxia	2016	0.0654545	0.00534139	0.720339	0.214094	0.000846036	0.0307692	0.0713807	0.850418	0.868952	0.14015	0.984802	0.890747
Ningxia	2017	0.0971706	0.00629123	0.659403	0.288764	0.00169207	0.032967	0.0733914	0.877281	0.877592	0.14015	0.988303	0.917232
Ningxia	2018	0.117393	0.00953944	0.435028	0.477424	0.00443584	0.0417582	0.073559	0.890359	0.88651	0.151738	0.986773	0.920543
Ningxia	2019	0.112432	0.00763976	0.527441	0.355501	0.00295879	0.0505495	0.0797587	0.895685	0.881269	0.151738	0.987888	0.927164
Ningxia	2020	0.0941459	0.00592771	0.591203	0.258196	0.0018323	0.0725275	0.0802614	0.904171	0.886249	0.151738	0.987084	0.940407
Ningxia	2021	0.0695508	0.00449708	0.649718	0.148407	0.000635695	0.0747253	0.0767426	0.933187	0.905362	0.151738	0.988693	0.965238
Ningxia	2022	0.0408248	0.00413943	0.631961	0.133707	0.000350567	0.0791209	0.0737265	0.941009	0.918659	0.151738	0.985474	0.97848
Xinjiang	2008	0.00696545	0.223271	0.194915	0.927196	0.0179163	0.00659341	0.847688	0.821793	0	0	0.940411	0.544446
Xinjiang	2009	0.0109408	0.203143	0.190073	0.920663	0.0161214	0.0175824	0.852212	0.790177	0.173164	0.016912	0.937688	0.587817
Xinjiang	2010	0.0416544	0.297458	0.164649	0.946681	0.0266057	0.00879121	0.859249	0.83586	0.345812	0.016912	0.930618	0.553054
Xinjiang	2011	0.0145704	0.233321	0.184423	0.933847	0.0199636	0.0131868	0.839812	0.854624	0.474786	0.016912	0.931012	0.614302
Xinjiang	2012	0.0215359	0.23474	0.187651	0.92638	0.0203983	0	0.951408	0.865741	0.478635	0.016912	0.919593	0.735143
Xinjiang	2013	0.0181482	0.246255	0.174738	0.931047	0.0220156	0	0.947889	0.865012	0.534297	0.020357	0.912066	0.793081
Xinjiang	2014	0.00940249	0.183812	0.184826	0.909462	0.0153221	0.0021978	0.9375	0.871811	0.585281	0.020357	0.909857	0.766595
Xinjiang	2015	0.0310075	0.231145	0.174738	0.930463	0.0212631	0.00659341	0.929792	0.867738	0.590911	0.020357	0.912903	0.720245
Xinjiang	2016	0.0462693	0.26643	0.163438	0.94248	0.0260308	0.010989	0.91002	0.864383	0.613112	0.020357	0.919488	0.758318
Xinjiang	2017	0.0283976	0.243587	0.170702	0.939564	0.0238432	0.0153846	0.88807	0.87638	0.665735	0.020357	0.911445	0.817911
Xinjiang	2018	0.0284322	0.201149	0.171913	0.928246	0.0191784	0.0153846	0.882205	0.899364	0.704448	0.0302224	0.933875	0.920543
Xinjiang	2019	0.0260815	0.200616	0.173931	0.924046	0.0195056	0.0153846	0.947386	0.911602	0.716294	0.0302224	0.935291	0.960271
Xinjiang	2020	0.00428643	0.179379	0.19209	0.919729	0.0174863	0.021978	0.918398	0.914974	0.728927	0.0302224	0.93494	0.966893
Xinjiang	2021	0.0113556	0.180135	0.154964	0.920079	0.01772	0.0285714	0.924263	0.939085	0.765413	0.0302224	0.935642	0.950339
Xinjiang	2022	0	0.204051	0.152139	0.930463	0.020791	0.0307692	0.911696	0.955291	0.792132	0.0302224	0.934237	0.963582

## Sheet: 指标全局权重
指标	权重
X1	0.0863
X2	0.2146
X3	0.1983
X4	0.0088
X5	0.1607
X6	0.0732
X7	0.128
X8	0.0121
X9	0.0032
X10	0.0843
X11	0.0153
X12	0.0152

## Sheet: 障碍度计算结果
Province	year	X1_O	X2_O	X3_O	X4_O	X5_O	X6_O	X7_O	X8_O	X9_O	X10_O	X11_O	X12_O
Beijing	2008	0.0896	0.2721	0.1949	0.0013	0.1868	0.008	0.1603	0.0011	0.0001	0.0769	0.002	0.0069
Beijing	2009	0.0964	0.2764	0.1878	0.0021	0.1962	0.0092	0.1619	0.001	0.0001	0.0599	0.0026	0.0065
Beijing	2010	0.0904	0.2791	0.1895	0.002	0.1973	0.0084	0.1635	0.0008	0	0.0605	0.0025	0.006
Beijing	2011	0.0933	0.2791	0.1924	0.0018	0.1952	0.0046	0.1634	0.0007	0	0.0605	0.0027	0.0061
Beijing	2012	0.0889	0.2782	0.205	0.0012	0.1877	0.0061	0.1635	0.0006	0	0.0605	0.0026	0.0056
Beijing	2013	0.0932	0.2799	0.1967	0.0019	0.1968	0.0057	0.1637	0.0006	0	0.0535	0.0027	0.0052
Beijing	2014	0.0975	0.2795	0.1926	0.0024	0.199	0.0046	0.1629	0.0005	0	0.0534	0.0028	0.0047
Beijing	2015	0.0907	0.2828	0.1972	0.0019	0.1977	0.0036	0.1649	0.0004	0	0.0541	0.0029	0.004
Beijing	2016	0.0851	0.2834	0.2066	0.0015	0.1935	0.0034	0.1654	0.0003	0	0.0543	0.0032	0.0032
Beijing	2017	0.0916	0.2817	0.2055	0.0018	0.1953	0.0025	0.164	0.0002	0	0.0539	0.0025	0.0009
Beijing	2018	0.0974	0.2901	0.1978	0.0015	0.1978	0.0015	0.1692	0.0002	0	0.0414	0.0024	0.0006
Beijing	2019	0.0998	0.2931	0.1785	0.0024	0.2062	0.006	0.1698	0.0002	0	0.0417	0.0022	0.0003
Beijing	2020	0.0981	0.2869	0.1898	0.0021	0.2011	0.011	0.1665	0.0001	0	0.0408	0.0022	0.0012
Beijing	2021	0.0854	0.2974	0.2086	0.0009	0.1876	0	0.1742	0	0	0.0427	0.0022	0.0011
Beijing	2022	0.1024	0.2977	0.167	0.0024	0.2099	0.0022	0.1728	0	0	0.0423	0.0025	0.0008
Tianjin	2008	0.0802	0.244	0.2114	0.0014	0.1717	0.0469	0.1464	0.0005	0.0001	0.0886	0.0008	0.008
Tianjin	2009	0.0851	0.244	0.2068	0.0018	0.1737	0.0472	0.1459	0.0006	0.0001	0.0883	0.0008	0.0058
Tianjin	2010	0.0809	0.2488	0.199	0.0029	0.1809	0.0431	0.1486	0.0006	0	0.0897	0.0009	0.0044
Tianjin	2011	0.0813	0.2457	0.2109	0.0017	0.1746	0.0446	0.1469	0.0005	0	0.0889	0.0009	0.0039
Tianjin	2012	0.07	0.2476	0.224	0.0008	0.1643	0.0486	0.1491	0.0005	0	0.0902	0.0012	0.0036
Tianjin	2013	0.0824	0.2454	0.2101	0.0019	0.1748	0.0482	0.1464	0.0005	0	0.0862	0.0012	0.003
Tianjin	2014	0.0836	0.2439	0.21	0.0024	0.1758	0.0491	0.1452	0.0004	0	0.0855	0.0013	0.0027
Tianjin	2015	0.0797	0.2459	0.2065	0.0023	0.1763	0.0525	0.1461	0.0004	0	0.0863	0.0014	0.0025
Tianjin	2016	0.0765	0.2473	0.2137	0.0017	0.1733	0.0501	0.1469	0.0005	0	0.087	0.0007	0.0024
Tianjin	2017	0.0849	0.2474	0.2041	0.0025	0.1772	0.047	0.1466	0.0005	0	0.0868	0.0008	0.0022
Tianjin	2018	0.0786	0.2527	0.2096	0.0019	0.1779	0.0407	0.1497	0.0004	0	0.0854	0.001	0.0019
Tianjin	2019	0.0885	0.2511	0.1978	0.0042	0.1832	0.0397	0.1483	0.0004	0	0.0845	0.001	0.0013
Tianjin	2020	0.0863	0.2494	0.2047	0.0025	0.1786	0.0446	0.1478	0.0003	0	0.0842	0.0005	0.0011
Tianjin	2021	0.0725	0.2518	0.2243	0.001	0.1625	0.0494	0.1498	0.0002	0	0.086	0.0015	0.001
Tianjin	2022	0.0842	0.2491	0.2072	0.0024	0.1762	0.0489	0.1464	0.0002	0	0.0842	0.0005	0.0006
Hebei	2008	0.0879	0.2633	0.177	0.0015	0.1925	0.0708	0.1128	0.0019	0.0003	0.0804	0.0044	0.0071
Hebei	2009	0.094	0.265	0.1756	0.0017	0.1943	0.0709	0.1136	0.0017	0.0003	0.0732	0.0047	0.005
Hebei	2010	0.0875	0.2661	0.1819	0.0018	0.1953	0.0706	0.1141	0.0014	0.0002	0.0735	0.0051	0.0025
Hebei	2011	0.0918	0.2655	0.1827	0.0016	0.1941	0.0687	0.1134	0.0012	0.0002	0.0734	0.0054	0.002
Hebei	2012	0.084	0.2639	0.1931	0.001	0.1903	0.0714	0.1136	0.0011	0.0002	0.0734	0.006	0.0019
Hebei	2013	0.0892	0.2655	0.1844	0.0014	0.1935	0.0706	0.1148	0.0011	0.0002	0.0716	0.0061	0.0018
Hebei	2014	0.0941	0.2656	0.1782	0.0023	0.1959	0.0701	0.1138	0.001	0.0001	0.0713	0.006	0.0016
Hebei	2015	0.0893	0.267	0.1796	0.0018	0.196	0.0696	0.1162	0.0009	0.0001	0.0718	0.0061	0.0016
Hebei	2016	0.0831	0.2637	0.1983	0.0011	0.191	0.0667	0.1166	0.0008	0.0001	0.0713	0.0056	0.0015
Hebei	2017	0.092	0.2676	0.18	0.0017	0.1963	0.0659	0.1179	0.0007	0.0001	0.072	0.0049	0.0008
Hebei	2018	0.0917	0.2678	0.1888	0.0014	0.1954	0.0655	0.118	0.0007	0.0001	0.0666	0.0033	0.0007
Hebei	2019	0.0949	0.27	0.1791	0.0021	0.1988	0.0666	0.1185	0.0006	0.0001	0.0668	0.0018	0.0006
Hebei	2020	0.0921	0.2722	0.1781	0.0016	0.1993	0.0673	0.1197	0.0006	0.0001	0.0676	0.0009	0.0006
Hebei	2021	0.0807	0.2664	0.2088	0.0006	0.187	0.0661	0.1196	0.0004	0.0001	0.0674	0.0027	0.0004
Hebei	2022	0.0938	0.2697	0.185	0.0012	0.1961	0.0661	0.1191	0.0004	0.0001	0.0672	0.0009	0.0004
Shanxi	2008	0.0866	0.2553	0.1665	0.0008	0.1896	0.0587	0.1452	0.0014	0.0002	0.0851	0.0017	0.0088
Shanxi	2009	0.0855	0.2563	0.1687	0.0008	0.1904	0.0577	0.1459	0.0012	0.0002	0.084	0.0017	0.0076
Shanxi	2010	0.0864	0.2556	0.1723	0.0008	0.1896	0.0599	0.1436	0.0011	0.0002	0.0839	0.002	0.0047
Shanxi	2011	0.082	0.2558	0.1812	0.0007	0.1888	0.0581	0.1417	0.0009	0.0001	0.0843	0.0019	0.0042
Shanxi	2012	0.0841	0.2563	0.1745	0.0008	0.1897	0.0612	0.1418	0.001	0.0001	0.0843	0.0023	0.0037
Shanxi	2013	0.0837	0.2565	0.1817	0.0007	0.1893	0.0603	0.1423	0.001	0.0001	0.0783	0.0024	0.0036
Shanxi	2014	0.0858	0.2593	0.1721	0.0008	0.1917	0.06	0.1441	0.001	0.0001	0.079	0.0026	0.0037
Shanxi	2015	0.0884	0.2598	0.1679	0.001	0.1926	0.0607	0.1434	0.0013	0.0001	0.0789	0.0026	0.0034
Shanxi	2016	0.0811	0.2579	0.1812	0.0007	0.19	0.0607	0.1427	0.0013	0.0001	0.0788	0.0024	0.0031
Shanxi	2017	0.0848	0.2579	0.1793	0.0007	0.1901	0.0598	0.1428	0.0009	0.0001	0.0788	0.0023	0.0024
Shanxi	2018	0.089	0.2593	0.1777	0.0007	0.1913	0.0583	0.1435	0.0009	0.0001	0.0751	0.0024	0.0018
Shanxi	2019	0.0912	0.26	0.175	0.001	0.1925	0.0578	0.1429	0.0008	0.0001	0.075	0.0024	0.0014
Shanxi	2020	0.0857	0.2595	0.1854	0.0008	0.1919	0.0542	0.144	0.0007	0.0001	0.0751	0.0024	0.0002
Shanxi	2021	0.0752	0.256	0.2055	0.0004	0.1869	0.0529	0.1444	0.0004	0.0001	0.0753	0.0023	0.0006
Shanxi	2022	0.0858	0.259	0.1875	0.0006	0.1905	0.0529	0.1449	0.0002	0	0.0755	0.0024	0.0006
Inner Mongolia	2008	0.0959	0.2323	0.1977	0.0005	0.1904	0.0754	0.114	0.0047	0.0006	0.0777	0.001	0.0099
Inner Mongolia	2009	0.0987	0.2347	0.1982	0.0006	0.1909	0.0767	0.1127	0.0043	0.0005	0.0741	0.0011	0.0076
Inner Mongolia	2010	0.0978	0.236	0.1976	0.0006	0.192	0.0763	0.1132	0.004	0.0004	0.0746	0.0015	0.006
Inner Mongolia	2011	0.0993	0.233	0.204	0.0005	0.1907	0.0759	0.1119	0.0035	0.0003	0.0742	0.0016	0.005
Inner Mongolia	2012	0.0943	0.2293	0.2058	0.0004	0.1914	0.0816	0.1128	0.0031	0.0003	0.0748	0.0017	0.0045
Inner Mongolia	2013	0.0962	0.2038	0.2318	0.0002	0.1894	0.0819	0.1142	0.0029	0.0003	0.0738	0.0018	0.0037
Inner Mongolia	2014	0.097	0.2267	0.2113	0.0004	0.1903	0.0808	0.1129	0.0023	0.0002	0.0728	0.0018	0.0034
Inner Mongolia	2015	0.0971	0.2268	0.2133	0.0004	0.1903	0.0812	0.1119	0.0021	0.0002	0.0728	0.0018	0.0022
Inner Mongolia	2016	0.0984	0.2358	0.1994	0.0005	0.193	0.082	0.1118	0.0018	0.0002	0.0735	0.0017	0.0018
Inner Mongolia	2017	0.1008	0.2425	0.1906	0.0007	0.1937	0.0812	0.1122	0.0015	0.0003	0.0733	0.0017	0.0014
Inner Mongolia	2018	0.0966	0.2351	0.2036	0.0005	0.1938	0.082	0.112	0.0014	0.0003	0.0721	0.0018	0.0009
Inner Mongolia	2019	0.0987	0.2346	0.2051	0.0005	0.1927	0.0809	0.1116	0.0011	0.0003	0.0717	0.0018	0.0009
Inner Mongolia	2020	0.0976	0.2306	0.2097	0.0005	0.1931	0.0815	0.1112	0.001	0.0003	0.072	0.0018	0.0008
Inner Mongolia	2021	0.096	0.2049	0.2351	0.0002	0.1918	0.0823	0.1133	0.0006	0.0002	0.0729	0.0019	0.0007
Inner Mongolia	2022	0.1	0.2284	0.2126	0.0004	0.1916	0.0811	0.1111	0.0005	0.0002	0.0715	0.0018	0.0008
Liaoning	2008	0.0821	0.2554	0.2201	0.0006	0.1821	0.06	0.1257	0.002	0.0003	0.055	0.0039	0.0128
Liaoning	2009	0.0842	0.2597	0.2094	0.001	0.1888	0.0604	0.1262	0.0019	0.0002	0.0516	0.0041	0.0125
Liaoning	2010	0.0703	0.2544	0.246	0.0003	0.1677	0.0617	0.1312	0.0019	0.0002	0.0538	0.0043	0.0082
Liaoning	2011	0.0841	0.258	0.2248	0.0006	0.1828	0.0594	0.127	0.0014	0.0001	0.0522	0.0044	0.0051
Liaoning	2012	0.0694	0.2561	0.2426	0.0003	0.1713	0.064	0.1313	0.0013	0.0001	0.0537	0.0047	0.0051
Liaoning	2013	0.0769	0.2577	0.2379	0.0004	0.1758	0.0636	0.1305	0.0013	0.0001	0.0481	0.0046	0.0033
Liaoning	2014	0.0933	0.2627	0.2059	0.0012	0.1919	0.0607	0.1274	0.0013	0.0001	0.0469	0.005	0.0035
Liaoning	2015	0.0867	0.2623	0.2163	0.001	0.1902	0.0596	0.128	0.0013	0.0001	0.0471	0.005	0.0023
Liaoning	2016	0.0797	0.2607	0.2298	0.0005	0.1832	0.0587	0.1315	0.0013	0.0001	0.0478	0.0044	0.0021
Liaoning	2017	0.0902	0.2616	0.216	0.0009	0.1895	0.0563	0.1305	0.0011	0.0001	0.047	0.0045	0.0022
Liaoning	2018	0.0859	0.2596	0.2284	0.0007	0.1862	0.0559	0.1306	0.001	0.0001	0.0453	0.0047	0.0016
Liaoning	2019	0.0853	0.2619	0.2232	0.0006	0.187	0.057	0.1321	0.001	0.0001	0.0458	0.0047	0.0013
Liaoning	2020	0.0831	0.2579	0.2373	0.0004	0.1789	0.0569	0.1331	0.0009	0.0001	0.0461	0.0047	0.0007
Liaoning	2021	0.0754	0.2598	0.2427	0.0003	0.1757	0.0562	0.1365	0.0007	0.0001	0.0472	0.0048	0.0006
Liaoning	2022	0.0795	0.2575	0.2446	0.0003	0.1721	0.0553	0.1372	0.0006	0.0001	0.0472	0.0049	0.0008
Jilin	2008	0.0796	0.2426	0.2263	0.0004	0.18	0.0677	0.134	0.0065	0.0004	0.0459	0.0018	0.0149
Jilin	2009	0.081	0.2456	0.2247	0.0004	0.1824	0.0682	0.1328	0.0069	0.0004	0.0448	0.0018	0.0109
Jilin	2010	0.071	0.2358	0.2489	0.0002	0.1721	0.0698	0.1374	0.0067	0.0004	0.0472	0.002	0.0085
Jilin	2011	0.0865	0.2471	0.2239	0.0005	0.1834	0.0713	0.1288	0.0056	0.0003	0.0453	0.002	0.0054
Jilin	2012	0.0743	0.2441	0.2325	0.0003	0.18	0.0774	0.1319	0.0052	0.0003	0.0462	0.0021	0.0057
Jilin	2013	0.0727	0.2399	0.2424	0.0003	0.1757	0.0784	0.1338	0.0048	0.0003	0.0446	0.0021	0.0052
Jilin	2014	0.0869	0.2489	0.2215	0.0005	0.1848	0.0754	0.129	0.0043	0.0002	0.0431	0.0021	0.0032
Jilin	2015	0.0828	0.2494	0.224	0.0005	0.1849	0.076	0.1298	0.0037	0.0002	0.0435	0.0022	0.0031
Jilin	2016	0.0756	0.2459	0.2363	0.0003	0.1812	0.0753	0.1331	0.0033	0.0002	0.0445	0.0016	0.0027
Jilin	2017	0.0851	0.2463	0.2293	0.0004	0.1823	0.0732	0.132	0.0027	0.0002	0.0436	0.0021	0.0028
Jilin	2018	0.0784	0.2447	0.238	0.0003	0.1806	0.0729	0.1359	0.0025	0.0002	0.0424	0.002	0.0021
Jilin	2019	0.0807	0.2437	0.2364	0.0003	0.1798	0.0734	0.1374	0.002	0.0002	0.0425	0.002	0.0016
Jilin	2020	0.0763	0.2394	0.2427	0.0002	0.1789	0.0754	0.1393	0.0013	0.0002	0.0433	0.0021	0.0008
Jilin	2021	0.0802	0.2443	0.2322	0.0003	0.1832	0.0733	0.1396	0.001	0.0002	0.0427	0.002	0.0009
Jilin	2022	0.0811	0.232	0.2464	0.0002	0.1742	0.0742	0.1441	0.0011	0.0002	0.0436	0.0021	0.0008
Heilongjiang	2008	0.0902	0.2549	0.2136	0.0008	0.1962	0.0844	0.088	0.008	0.001	0.0458	0.0019	0.0152
Heilongjiang	2009	0.0866	0.2392	0.2424	0.0004	0.1902	0.0876	0.085	0.0086	0.001	0.0422	0.002	0.0147
Heilongjiang	2010	0.0893	0.243	0.2394	0.0005	0.1915	0.0879	0.0819	0.0076	0.0008	0.0418	0.0021	0.0142
Heilongjiang	2011	0.0942	0.2514	0.233	0.0007	0.1954	0.0863	0.0739	0.006	0.0008	0.0416	0.0028	0.014
Heilongjiang	2012	0.0868	0.2475	0.2414	0.0005	0.1949	0.0912	0.0736	0.0046	0.0007	0.0425	0.0031	0.0131
Heilongjiang	2013	0.086	0.2326	0.2606	0.0003	0.1905	0.0949	0.0759	0.0038	0.0007	0.043	0.0031	0.0085
Heilongjiang	2014	0.091	0.2457	0.2474	0.0005	0.1948	0.0914	0.0729	0.0033	0.0007	0.0416	0.0029	0.0078
Heilongjiang	2015	0.0904	0.25	0.2423	0.0006	0.1965	0.0915	0.075	0.0034	0.0006	0.0414	0.0028	0.0053
Heilongjiang	2016	0.0877	0.25	0.2448	0.0005	0.1971	0.0925	0.0763	0.0032	0.0006	0.0416	0.0026	0.003
Heilongjiang	2017	0.0929	0.2519	0.2393	0.0006	0.1973	0.0916	0.0754	0.0031	0.0006	0.0412	0.0026	0.0034
Heilongjiang	2018	0.0894	0.2448	0.2467	0.0004	0.1954	0.093	0.0796	0.0032	0.0006	0.041	0.0028	0.0032
Heilongjiang	2019	0.0857	0.2275	0.2606	0.0003	0.1888	0.0945	0.0915	0.0031	0.0006	0.042	0.0028	0.0026
Heilongjiang	2020	0.0876	0.222	0.2609	0.0003	0.1921	0.0957	0.0909	0.0032	0.0007	0.0422	0.0028	0.0015
Heilongjiang	2021	0.0881	0.2299	0.2572	0.0003	0.1948	0.0941	0.0868	0.0025	0.0006	0.0417	0.0028	0.0012
Heilongjiang	2022	0.0946	0.2376	0.2452	0.0004	0.1953	0.0912	0.0891	0.0017	0.0005	0.0405	0.0027	0.0011
Shanghai	2008	0.0553	0.2598	0.2301	0.004	0.1435	0.0566	0.1307	0.0068	0.0002	0.1026	0.0042	0.0063
Shanghai	2009	0.0546	0.2644	0.2382	0.0038	0.1394	0.058	0.1318	0.0075	0.0002	0.0942	0.0044	0.0035
Shanghai	2010	0.0517	0.2637	0.2364	0.0043	0.1457	0.0575	0.1307	0.0061	0.0002	0.0937	0.0047	0.0053
Shanghai	2011	0.0611	0.2588	0.2199	0.0074	0.1655	0.0535	0.1282	0.0053	0.0001	0.0915	0.0039	0.0048
Shanghai	2012	0.044	0.2682	0.2358	0.0044	0.1523	0.0526	0.1356	0.0048	0.0001	0.0952	0.0042	0.0028
Shanghai	2013	0.0685	0.2594	0.227	0.0055	0.1556	0.0519	0.129	0.0051	0.0001	0.0898	0.0041	0.004
Shanghai	2014	0.0468	0.2716	0.247	0.0029	0.1346	0.0503	0.1405	0.0042	0.0001	0.0944	0.0043	0.0034
Shanghai	2015	0.0348	0.2814	0.2601	0.0022	0.1132	0.0519	0.1468	0.0043	0.0001	0.0983	0.0045	0.0025
Shanghai	2016	0.0329	0.2815	0.2598	0.0023	0.118	0.0502	0.1464	0.0042	0.0001	0.0982	0.0044	0.002
Shanghai	2017	0.0594	0.2653	0.2347	0.0039	0.1505	0.048	0.1371	0.0034	0.0001	0.092	0.004	0.0018
Shanghai	2018	0.0588	0.2684	0.24	0.0034	0.1454	0.0482	0.1392	0.0031	0.0001	0.0877	0.004	0.0016
Shanghai	2019	0.0465	0.275	0.2499	0.0027	0.1345	0.0489	0.1437	0.0031	0	0.09	0.0042	0.0013
Shanghai	2020	0.0339	0.2825	0.2591	0.0022	0.1221	0.0499	0.1489	0.0031	0	0.0927	0.0043	0.0012
Shanghai	2021	0.0389	0.2795	0.255	0.0026	0.1281	0.0512	0.1448	0.0031	0	0.0916	0.0042	0.0011
Shanghai	2022	0.0679	0.2635	0.2347	0.004	0.1508	0.0496	0.1359	0.0028	0	0.0859	0.0041	0.0007
Jiangsu	2008	0.0658	0.2778	0.2485	0.002	0.178	0.0825	0.0173	0.0074	0.0005	0.1039	0.0108	0.0054
Jiangsu	2009	0.0679	0.2785	0.2513	0.0018	0.1766	0.0818	0.02	0.0063	0.0004	0.0992	0.0112	0.005
Jiangsu	2010	0.0698	0.2787	0.2503	0.0019	0.178	0.0813	0.0191	0.0053	0.0004	0.0991	0.0119	0.0043
Jiangsu	2011	0.0679	0.2798	0.2588	0.0015	0.1694	0.0827	0.0182	0.0047	0.0003	0.1003	0.0129	0.0035
Jiangsu	2012	0.0715	0.2784	0.2487	0.002	0.1787	0.0822	0.0191	0.0043	0.0003	0.0989	0.0128	0.0032
Jiangsu	2013	0.0782	0.2813	0.2444	0.0028	0.1881	0.0829	0.0121	0.0046	0.0003	0.0899	0.0128	0.0028
Jiangsu	2014	0.0673	0.2866	0.2561	0.0021	0.1816	0.0852	0.0082	0.0048	0.0002	0.0923	0.0133	0.0023
Jiangsu	2015	0.0601	0.289	0.2678	0.0014	0.1669	0.0857	0.0134	0.0046	0.0002	0.0944	0.0141	0.0023
Jiangsu	2016	0.0484	0.2951	0.2796	0.0011	0.1556	0.0882	0.013	0.0047	0.0002	0.0976	0.0144	0.0021
Jiangsu	2017	0.0713	0.2864	0.2565	0.0021	0.182	0.0828	0.0082	0.004	0.0002	0.0922	0.0127	0.0017
Jiangsu	2018	0.0678	0.2884	0.2552	0.0022	0.1845	0.0824	0.008	0.0038	0.0002	0.0938	0.0121	0.0016
Jiangsu	2019	0.0819	0.2844	0.247	0.0037	0.1944	0.0804	0	0.0035	0.0002	0.0915	0.0115	0.0014
Jiangsu	2020	0.0549	0.2927	0.2687	0.0015	0.1722	0.0827	0.0143	0.0034	0.0001	0.0962	0.012	0.0012
Jiangsu	2021	0.0638	0.2897	0.2634	0.0016	0.1742	0.0805	0.0154	0.0029	0.0001	0.095	0.012	0.0012
Jiangsu	2022	0.0856	0.2894	0.2287	0.0044	0.201	0.0807	0.0021	0.0027	0.0001	0.0928	0.0114	0.001
Zhejiang	2008	0.0468	0.2847	0.2815	0.0003	0.1427	0.0724	0.1266	0.0034	0.0003	0.024	0.0081	0.0093
Zhejiang	2009	0.0435	0.2882	0.2885	0.0003	0.1371	0.0686	0.1353	0.003	0.0002	0.0186	0.0086	0.0081
Zhejiang	2010	0.0266	0.2988	0.3201	0.0002	0.0923	0.074	0.1462	0.003	0.0002	0.0203	0.011	0.0073
Zhejiang	2011	0.0614	0.2845	0.274	0.0004	0.1517	0.0631	0.1296	0.0023	0.0002	0.0178	0.0096	0.0055
Zhejiang	2012	0.0275	0.3014	0.3236	0.0002	0.0876	0.0706	0.1495	0.0025	0.0002	0.0205	0.0111	0.0053
Zhejiang	2013	0.052	0.291	0.2892	0.0003	0.1374	0.063	0.1354	0.0021	0.0001	0.0153	0.01	0.0042
Zhejiang	2014	0.0329	0.2993	0.3068	0.0002	0.1208	0.0631	0.1445	0.0019	0.0001	0.0161	0.0105	0.0038
Zhejiang	2015	0.0161	0.3079	0.328	0.0002	0.0937	0.0641	0.1561	0.0017	0.0001	0.0171	0.0116	0.0035
Zhejiang	2016	0.0283	0.3045	0.3206	0.0002	0.102	0.0579	0.1544	0.0015	0.0001	0.0168	0.0113	0.0026
Zhejiang	2017	0.0461	0.2955	0.2911	0.0003	0.1427	0.0519	0.1427	0.0012	0.0001	0.0154	0.0109	0.002
Zhejiang	2018	0.0527	0.2946	0.2866	0.0003	0.1449	0.0491	0.1435	0.001	0.0001	0.0146	0.0111	0.0017
Zhejiang	2019	0.0372	0.3041	0.3182	0.0002	0.1014	0.0498	0.1585	0.0009	0.0001	0.0159	0.0124	0.0014
Zhejiang	2020	0.0387	0.3037	0.3004	0.0002	0.1313	0.0466	0.152	0.0007	0.0001	0.0151	0.0102	0.001
Zhejiang	2021	0.0198	0.3151	0.3245	0.0002	0.1006	0.0458	0.1616	0.0006	0	0.0162	0.0145	0.001
Zhejiang	2022	0.0515	0.3022	0.2951	0.0002	0.1399	0.0399	0.1482	0.0005	0	0.0149	0.0067	0.0008
Anhui	2008	0.0568	0.2608	0.2469	0.0005	0.1606	0.0777	0.0982	0.0142	0.0008	0.0733	0.0032	0.007
Anhui	2009	0.0621	0.2626	0.2496	0.0005	0.1598	0.0793	0.092	0.0136	0.0008	0.0705	0.0035	0.0056
Anhui	2010	0.055	0.2651	0.2616	0.0004	0.1508	0.0809	0.0945	0.0106	0.0007	0.0727	0.0037	0.004
Anhui	2011	0.0616	0.2647	0.2503	0.0006	0.1685	0.0772	0.091	0.0075	0.0005	0.0703	0.0049	0.003
Anhui	2012	0.0622	0.2643	0.2536	0.0005	0.1629	0.0783	0.0923	0.0073	0.0005	0.0709	0.0051	0.0019
Anhui	2013	0.0625	0.2661	0.2501	0.0006	0.1702	0.0778	0.0909	0.0065	0.0004	0.068	0.0054	0.0014
Anhui	2014	0.0531	0.2675	0.2582	0.0004	0.1604	0.0774	0.1	0.0059	0.0003	0.0697	0.0057	0.0014
Anhui	2015	0.05	0.2692	0.2653	0.0004	0.1535	0.0796	0.0971	0.0062	0.0004	0.071	0.006	0.0012
Anhui	2016	0.041	0.2719	0.2814	0.0003	0.1347	0.0829	0.1009	0.006	0.0003	0.0742	0.0053	0.001
Anhui	2017	0.0541	0.2705	0.2578	0.0005	0.1615	0.0783	0.0957	0.0052	0.0003	0.0703	0.0048	0.001
Anhui	2018	0.0593	0.2695	0.2593	0.0004	0.1578	0.0777	0.097	0.0046	0.0002	0.0684	0.0047	0.0009
Anhui	2019	0.0745	0.2652	0.2452	0.0007	0.1716	0.073	0.0949	0.0039	0.0002	0.0653	0.0045	0.001
Anhui	2020	0.0399	0.2725	0.2831	0.0003	0.1329	0.0799	0.1086	0.0041	0.0002	0.0727	0.0049	0.0011
Anhui	2021	0.0582	0.2694	0.2615	0.0004	0.1554	0.075	0.1018	0.0034	0.0002	0.0688	0.0048	0.0011
Anhui	2022	0.0747	0.2675	0.2453	0.0007	0.1731	0.0749	0.0896	0.003	0.0002	0.066	0.0044	0.0007
Fujian	2008	0.0416	0.2767	0.2893	0.0003	0.1271	0.0905	0.1396	0.0102	0.0006	0.0078	0.0056	0.0107
Fujian	2009	0.0518	0.2766	0.2747	0.0003	0.148	0.0867	0.1322	0.0089	0.0005	0.0072	0.0056	0.0074
Fujian	2010	0.0286	0.2789	0.3399	0.0002	0.0615	0.1026	0.157	0.0089	0.0005	0.0086	0.0064	0.007
Fujian	2011	0.0584	0.278	0.2728	0.0004	0.1505	0.0838	0.1295	0.0063	0.0003	0.0072	0.0073	0.0056
Fujian	2012	0.0253	0.285	0.3331	0.0002	0.0794	0.0929	0.1559	0.006	0.0003	0.0085	0.0068	0.0064
Fujian	2013	0.0424	0.2868	0.3037	0.0003	0.1191	0.0846	0.1442	0.005	0.0003	0.0018	0.0065	0.0053
Fujian	2014	0.0495	0.2847	0.3077	0.0002	0.1111	0.0844	0.1445	0.0045	0.0003	0.0018	0.0065	0.0048
Fujian	2015	0.0225	0.2927	0.3249	0.0002	0.1024	0.0864	0.1529	0.0044	0.0002	0.0019	0.0067	0.0046
Fujian	2016	0.0041	0.2977	0.3933	0.0001	0	0.0981	0.1875	0.0046	0.0002	0.0023	0.0074	0.0046
Fujian	2017	0.0502	0.2868	0.2989	0.0003	0.1279	0.0769	0.1451	0.003	0.0002	0.0018	0.0058	0.0032
Fujian	2018	0.0523	0.2879	0.2803	0.0003	0.1543	0.0718	0.1403	0.0024	0.0001	0	0.0077	0.0026
Fujian	2019	0.0444	0.2892	0.3207	0.0002	0.0961	0.0763	0.1594	0.0022	0.0001	0	0.0092	0.0022
Fujian	2020	0.0543	0.2892	0.2783	0.0003	0.1556	0.0714	0.1408	0.0014	0.0001	0	0.0074	0.0012
Fujian	2021	0.0454	0.2914	0.2807	0.0003	0.1568	0.0726	0.1418	0.0009	0.0001	0	0.0091	0.0008
Fujian	2022	0.0336	0.2953	0.3115	0.0002	0.1175	0.0755	0.1588	0.0006	0.0001	0	0.0063	0.0007
Jiangxi	2008	0.0428	0.261	0.2794	0.0002	0.149	0.0893	0.1222	0.0125	0.0011	0.0214	0.0029	0.0182
Jiangxi	2009	0.051	0.2667	0.2771	0.0003	0.1599	0.0865	0.1187	0.0099	0.001	0.0164	0.0031	0.0094
Jiangxi	2010	0.0187	0.261	0.3346	0.0001	0.1025	0.1002	0.1408	0.0093	0.0009	0.0194	0.0041	0.0085
Jiangxi	2011	0.06	0.2708	0.2711	0.0003	0.1673	0.0859	0.1112	0.0065	0.0007	0.0163	0.0042	0.0056
Jiangxi	2012	0.0136	0.2652	0.3324	0.0002	0.1096	0.1014	0.1388	0.0069	0.0007	0.0192	0.0052	0.0069
Jiangxi	2013	0.0536	0.2684	0.2894	0.0003	0.1492	0.0917	0.1162	0.0056	0.0006	0.0137	0.0048	0.0066
Jiangxi	2014	0.0339	0.2709	0.3046	0.0002	0.1406	0.0946	0.123	0.0056	0.0005	0.0143	0.005	0.0066
Jiangxi	2015	0.0085	0.2729	0.3276	0.0002	0.1221	0.0991	0.1366	0.006	0.0005	0.0153	0.0058	0.0054
Jiangxi	2016	0.01	0.2703	0.3373	0.0002	0.1081	0.1012	0.1405	0.0057	0.0005	0.0157	0.0059	0.0047
Jiangxi	2017	0.043	0.2699	0.3051	0.0002	0.1383	0.0914	0.1263	0.0048	0.0004	0.0142	0.0045	0.002
Jiangxi	2018	0.0499	0.2754	0.2839	0.0003	0.1645	0.0864	0.1182	0.0042	0.0003	0.0111	0.0038	0.0017
Jiangxi	2019	0.0366	0.2695	0.3233	0.0002	0.1169	0.0977	0.1323	0.0045	0.0003	0.0126	0.0042	0.0021
Jiangxi	2020	0.0356	0.2718	0.3104	0.0002	0.1385	0.0927	0.1299	0.0035	0.0003	0.012	0.0039	0.0011
Jiangxi	2021	0.0447	0.2729	0.2979	0.0002	0.1518	0.09	0.1232	0.0026	0.0002	0.0116	0.0039	0.0009
Jiangxi	2022	0.0444	0.2732	0.3047	0.0002	0.1455	0.0938	0.119	0.0023	0.0003	0.0118	0.0037	0.0011
Shandong	2008	0.0749	0.263	0.2078	0.0008	0.1816	0.0644	0.1068	0.0007	0.0002	0.0879	0.007	0.0048
Shandong	2009	0.0831	0.2648	0.2001	0.001	0.185	0.0637	0.1072	0.0007	0.0001	0.0828	0.0077	0.0038
Shandong	2010	0.0808	0.2647	0.2051	0.0009	0.1837	0.0629	0.1066	0.0007	0.0001	0.0829	0.0087	0.0029
Shandong	2011	0.079	0.2656	0.2085	0.0008	0.1824	0.0616	0.1068	0.0007	0.0001	0.0833	0.0089	0.0023
Shandong	2012	0.082	0.2637	0.2026	0.001	0.1847	0.0655	0.1061	0.0006	0.0001	0.0823	0.0095	0.0019
Shandong	2013	0.0837	0.2631	0.2031	0.0009	0.1834	0.0644	0.107	0.0005	0.0001	0.0822	0.0098	0.0017
Shandong	2014	0.0903	0.2656	0.1836	0.0018	0.1922	0.0639	0.108	0.0005	0.0001	0.0823	0.0103	0.0016
Shandong	2015	0.0894	0.2657	0.1837	0.0016	0.1913	0.0642	0.1086	0.0005	0.0001	0.0824	0.0112	0.0014
Shandong	2016	0.0845	0.2671	0.1894	0.0012	0.1897	0.0637	0.1092	0.0005	0.0001	0.0831	0.0102	0.0013
Shandong	2017	0.0866	0.2643	0.1953	0.0012	0.1875	0.0621	0.1093	0.0004	0.0001	0.0823	0.01	0.001
Shandong	2018	0.0839	0.2649	0.2068	0.0008	0.1819	0.0618	0.1094	0.0005	0	0.0817	0.0074	0.0009
Shandong	2019	0.0909	0.265	0.1966	0.0014	0.1894	0.0619	0.1052	0.0005	0.0001	0.081	0.0074	0.0007
Shandong	2020	0.0785	0.2665	0.212	0.0007	0.1814	0.0623	0.1076	0.0005	0.0001	0.0823	0.0075	0.0006
Shandong	2021	0.0708	0.2677	0.2235	0.0005	0.1744	0.0584	0.1125	0.0004	0	0.0835	0.0075	0.0006
Shandong	2022	0.084	0.2639	0.2212	0.0005	0.1728	0.0579	0.1089	0.0004	0	0.0822	0.0076	0.0006
Henan	2008	0.0747	0.2624	0.2121	0.0008	0.1809	0.0646	0.1048	0.0029	0.0003	0.0834	0.006	0.0071
Henan	2009	0.0778	0.266	0.2078	0.0009	0.1852	0.0653	0.1043	0.0029	0.0003	0.0777	0.0066	0.0052
Henan	2010	0.0777	0.2621	0.2247	0.0005	0.1733	0.0636	0.1066	0.0025	0.0002	0.0775	0.0071	0.004
Henan	2011	0.0792	0.2666	0.207	0.0009	0.1857	0.0635	0.1057	0.0022	0.0002	0.0778	0.0076	0.0036
Henan	2012	0.0859	0.2638	0.2016	0.0011	0.1865	0.0684	0.1017	0.0022	0.0002	0.0767	0.008	0.0039
Henan	2013	0.0868	0.2669	0.1952	0.0014	0.1911	0.0679	0.102	0.0021	0.0002	0.0751	0.0082	0.003
Henan	2014	0.0819	0.2649	0.2047	0.0009	0.1865	0.0635	0.1101	0.0017	0.0001	0.0749	0.0084	0.0025
Henan	2015	0.0808	0.2667	0.2047	0.001	0.1876	0.0641	0.1072	0.0016	0.0001	0.0754	0.0087	0.0021
Henan	2016	0.078	0.2681	0.2104	0.0009	0.1863	0.0624	0.1068	0.0015	0.0001	0.0761	0.0081	0.0014
Henan	2017	0.0767	0.2674	0.2187	0.0007	0.1819	0.0622	0.1054	0.0014	0.0001	0.0763	0.0083	0.0011
Henan	2018	0.0782	0.2699	0.2129	0.0009	0.1874	0.0622	0.1056	0.0013	0.0001	0.0721	0.0085	0.001
Henan	2019	0.0907	0.2701	0.1953	0.0018	0.1953	0.0612	0.1037	0.0011	0.0001	0.0714	0.0086	0.0008
Henan	2020	0.0763	0.2689	0.2229	0.0007	0.1834	0.0603	0.1049	0.0009	0.0001	0.0721	0.0089	0.0006
Henan	2021	0.0655	0.2715	0.2376	0.0004	0.1718	0.0577	0.1117	0.0006	0.0001	0.074	0.0087	0.0004
Henan	2022	0.0889	0.2674	0.2086	0.0012	0.1896	0.0576	0.1057	0.0004	0.0001	0.071	0.0092	0.0003
Hubei	2008	0.0549	0.257	0.252	0.0003	0.1584	0.0776	0.0998	0.0122	0.0007	0.0706	0.0053	0.0113
Hubei	2009	0.0627	0.2614	0.2454	0.0004	0.1688	0.0779	0.0961	0.0106	0.0006	0.0624	0.0054	0.0083
Hubei	2010	0.0536	0.2606	0.266	0.0003	0.1514	0.081	0.0988	0.0099	0.0005	0.0655	0.0058	0.0068
Hubei	2011	0.0659	0.2646	0.2449	0.0005	0.1733	0.0773	0.0921	0.0077	0.0004	0.0627	0.0061	0.0046
Hubei	2012	0.0606	0.2654	0.2482	0.0005	0.1717	0.0804	0.0922	0.0068	0.0004	0.0633	0.0061	0.0045
Hubei	2013	0.0635	0.2707	0.2529	0.0005	0.176	0.0747	0.0959	0.0049	0.0003	0.0512	0.0062	0.003
Hubei	2014	0.0525	0.2733	0.2599	0.0004	0.1728	0.0751	0.0992	0.0045	0.0003	0.0524	0.0066	0.0029
Hubei	2015	0.0545	0.2739	0.2671	0.0004	0.1691	0.0711	0.0966	0.0045	0.0003	0.0531	0.0069	0.0025
Hubei	2016	0.0494	0.2714	0.2873	0.0002	0.1472	0.0689	0.1072	0.0043	0.0002	0.0556	0.0063	0.002
Hubei	2017	0.0543	0.2735	0.2758	0.0003	0.1591	0.0681	0.1023	0.0037	0.0002	0.0544	0.0061	0.0021
Hubei	2018	0.0609	0.2763	0.2615	0.0005	0.1767	0.0659	0.0969	0.0032	0.0002	0.0503	0.0058	0.0017
Hubei	2019	0.0707	0.2765	0.2491	0.0007	0.1861	0.0649	0.0926	0.0031	0.0002	0.0491	0.0071	0
Hubei	2020	0.0375	0.2737	0.2981	0.0002	0.1367	0.0732	0.1126	0.0035	0.0002	0.0554	0.0075	0.0013
Hubei	2021	0.0577	0.2758	0.2747	0.0004	0.1634	0.0752	0.0884	0.003	0.0002	0.0523	0.0081	0.0009
Hubei	2022	0.0778	0.2765	0.2513	0.0007	0.1825	0.0732	0.0789	0.0026	0.0002	0.0496	0.0058	0.0009
Hunan	2008	0.0528	0.2675	0.2786	0.0003	0.1434	0.0787	0.0923	0.012	0.0009	0.0503	0.0056	0.0177
Hunan	2009	0.0573	0.2709	0.2748	0.0003	0.1535	0.0771	0.0919	0.0109	0.0007	0.042	0.0058	0.0149
Hunan	2010	0.0296	0.2791	0.3013	0.0002	0.1352	0.0836	0.0987	0.0097	0.0006	0.0455	0.0065	0.01
Hunan	2011	0.0687	0.2725	0.2682	0.0004	0.1648	0.0763	0.0883	0.0073	0.0005	0.0409	0.0061	0.0062
Hunan	2012	0.0317	0.279	0.3046	0.0002	0.1307	0.089	0.0979	0.0074	0.0005	0.0457	0.0074	0.0057
Hunan	2013	0.053	0.2779	0.2865	0.0003	0.1486	0.0856	0.0921	0.0062	0.0004	0.0377	0.0072	0.0045
Hunan	2014	0.0331	0.2843	0.2995	0.0003	0.1418	0.0879	0.0963	0.0056	0.0004	0.0393	0.0076	0.004
Hunan	2015	0.0278	0.2855	0.3061	0.0002	0.1365	0.0888	0.0985	0.0055	0.0004	0.0399	0.0078	0.003
Hunan	2016	0.0249	0.2862	0.3168	0.0002	0.1228	0.0905	0.1015	0.0055	0.0003	0.0412	0.0076	0.0025
Hunan	2017	0.042	0.2827	0.3019	0.0002	0.1352	0.0856	0.0984	0.005	0.0003	0.0394	0.0073	0.0019
Hunan	2018	0.0478	0.2848	0.2848	0.0003	0.1622	0.0814	0.0904	0.0052	0.0003	0.0337	0.0076	0.0016
Hunan	2019	0.0442	0.2841	0.309	0.0002	0.1264	0.0865	0.0985	0.0048	0.0003	0.0362	0.0085	0.0013
Hunan	2020	0.0245	0.2862	0.3154	0.0002	0.1274	0.0865	0.1101	0.0029	0.0002	0.0369	0.0085	0.001
Hunan	2021	0.0472	0.2834	0.2986	0.0003	0.1422	0.0817	0.0995	0.0026	0.0002	0.0353	0.0083	0.0007
Hunan	2022	0.0573	0.2809	0.2925	0.0003	0.1459	0.0829	0.0947	0.0021	0.0002	0.0346	0.0079	0.0008
Guangdong	2008	0.0294	0.3132	0.3236	0.0003	0.117	0.0759	0.0569	0.0053	0.0004	0.0451	0.0185	0.0144
Guangdong	2009	0.0536	0.3052	0.2993	0.0004	0.1482	0.0708	0.0525	0.0047	0.0004	0.036	0.0175	0.0114
Guangdong	2010	0.0199	0.3237	0.3247	0.0004	0.1326	0.0748	0.0546	0.0043	0.0003	0.0389	0.0199	0.0061
Guangdong	2011	0.057	0.3064	0.296	0.0005	0.1554	0.0661	0.0515	0.0033	0.0003	0.0355	0.0198	0.0083
Guangdong	2012	0.0206	0.3229	0.3234	0.0003	0.1301	0.0715	0.0609	0.0031	0.0003	0.0387	0.0231	0.0051
Guangdong	2013	0.0211	0.3262	0.3319	0.0003	0.1161	0.0727	0.0653	0.0029	0.0002	0.0355	0.0243	0.0035
Guangdong	2014	0.0468	0.3127	0.3061	0.0004	0.1441	0.0666	0.0607	0.0024	0.0002	0.0329	0.0237	0.0035
Guangdong	2015	0.027	0.3221	0.32	0.0004	0.1352	0.068	0.0631	0.0022	0.0002	0.0343	0.0248	0.0028
Guangdong	2016	0	0.3364	0.3455	0.0003	0.1061	0.0709	0.0711	0.0022	0.0002	0.0369	0.0275	0.0029
Guangdong	2017	0.0453	0.3159	0.3091	0.0004	0.141	0.0631	0.0645	0.0018	0.0001	0.0332	0.0233	0.0024
Guangdong	2018	0.0389	0.3218	0.3169	0.0003	0.1368	0.0619	0.0705	0.0015	0.0001	0.0291	0.0199	0.0023
Guangdong	2019	0.0331	0.326	0.3233	0.0003	0.1274	0.061	0.0751	0.0014	0.0001	0.0297	0.021	0.0015
Guangdong	2020	0.054	0.3161	0.3033	0.0004	0.1489	0.0534	0.0729	0.0011	0.0001	0.0278	0.021	0.001
Guangdong	2021	0.0549	0.3146	0.2955	0.0005	0.1714	0.0461	0.0705	0.0008	0.0001	0.0272	0.0178	0.0007
Guangdong	2022	0.032	0.3323	0.3284	0.0003	0.1183	0.0509	0.0802	0.0008	0.0001	0.0302	0.0258	0.0008
Guangxi	2008	0.0321	0.2459	0.3054	0.0002	0.1379	0.08	0.1049	0.0162	0.0014	0.0531	0.0086	0.0143
Guangxi	2009	0.0484	0.2602	0.2897	0.0003	0.1667	0.0746	0.0997	0.0147	0.0012	0.0274	0.007	0.01
Guangxi	2010	0.0132	0.2655	0.3103	0.0002	0.1625	0.0822	0.1084	0.0126	0.001	0.0296	0.0078	0.0068
Guangxi	2011	0.0563	0.2595	0.2826	0.0003	0.1709	0.0758	0.0989	0.0097	0.0008	0.027	0.0049	0.0132
Guangxi	2012	0.0187	0.2612	0.3091	0.0002	0.1536	0.0936	0.1114	0.0095	0.0008	0.0306	0.0062	0.0052
Guangxi	2013	0.0194	0.2629	0.3151	0.0002	0.1551	0.0927	0.1095	0.0104	0.0007	0.0223	0.0056	0.006
Guangxi	2014	0.0285	0.2618	0.3134	0.0002	0.1558	0.0903	0.1077	0.0093	0.0006	0.0219	0.0054	0.0052
Guangxi	2015	0.0037	0.2607	0.3367	0.0002	0.1418	0.0949	0.1183	0.0094	0.0006	0.0234	0.0058	0.0045
Guangxi	2016	0.0188	0.264	0.3186	0.0002	0.1509	0.0907	0.1175	0.0078	0.0005	0.0226	0.0048	0.0034
Guangxi	2017	0.0204	0.2589	0.33	0.0002	0.1412	0.0907	0.1209	0.0067	0.0005	0.0229	0.005	0.0027
Guangxi	2018	0.0311	0.2703	0.3072	0.0002	0.1636	0.0861	0.1141	0.006	0.0005	0.0141	0.0047	0.0021
Guangxi	2019	0.017	0.2694	0.3227	0.0002	0.1548	0.0885	0.12	0.0062	0.0004	0.0146	0.0049	0.0012
Guangxi	2020	0.0271	0.2652	0.3169	0.0002	0.1515	0.0892	0.1256	0.0043	0.0004	0.0143	0.0048	0.0005
Guangxi	2021	0.0406	0.2712	0.2953	0.0002	0.1709	0.0842	0.1154	0.0034	0.0003	0.0134	0.0046	0.0005
Guangxi	2022	0.0345	0.2625	0.3192	0.0002	0.1468	0.0891	0.1248	0.0029	0.0003	0.0143	0.0047	0.0006
Hainan	2008	0.0443	0.2317	0.2901	0.0001	0.104	0.083	0.1856	0.01	0.001	0.0358	0.0004	0.0139
Hainan	2009	0.0378	0.2301	0.3063	0.0001	0.0876	0.0846	0.1957	0.0086	0.0009	0.0311	0.0005	0.0167
Hainan	2010	0.0418	0.2301	0.305	0.0001	0.0875	0.0837	0.1948	0.007	0.0007	0.0309	0.0004	0.0181
Hainan	2011	0.0232	0.2377	0.3138	0.0001	0.0888	0.0852	0.2013	0.0058	0.0006	0.032	0.0004	0.0112
Hainan	2012	0.0346	0.2463	0.2869	0.0002	0.1221	0.0798	0.1856	0.0048	0.0005	0.0295	0.0004	0.0095
Hainan	2013	0.029	0.2392	0.3174	0.0001	0.0835	0.084	0.2047	0.0057	0.0005	0.025	0.0004	0.0105
Hainan	2014	0.0382	0.2476	0.2918	0.0001	0.1175	0.0759	0.1887	0.0049	0.0004	0.0231	0.0005	0.0111
Hainan	2015	0.052	0.2573	0.2605	0.0003	0.1613	0.0661	0.1685	0.0035	0.0003	0.0207	0.0004	0.009
Hainan	2016	0.0248	0.2459	0.3182	0.0001	0.0883	0.0779	0.2048	0.0042	0.0004	0.0251	0.0007	0.0098
Hainan	2017	0.0463	0.2501	0.2924	0.0001	0.1176	0.0719	0.1889	0.0034	0.0003	0.0232	0.0006	0.0052
Hainan	2018	0.026	0.255	0.3082	0.0001	0.1109	0.0734	0.1978	0.0031	0.0003	0.02	0.0007	0.0045
Hainan	2019	0.0562	0.2591	0.2676	0.0002	0.151	0.0671	0.1754	0.0025	0.0002	0.0178	0.0006	0.0024
Hainan	2020	0.0522	0.2623	0.2705	0.0002	0.1486	0.0679	0.1776	0.0014	0.0002	0.0179	0.0006	0.0006
Hainan	2021	0.0554	0.259	0.2827	0.0002	0.1287	0.0689	0.1844	0.0011	0.0002	0.0187	0.0006	0.0003
Hainan	2022	0.0496	0.2609	0.2883	0.0002	0.124	0.0677	0.1882	0.0009	0.0002	0.0191	0.0007	0.0004
Chongqing	2008	0.0468	0.248	0.2594	0.0002	0.1427	0.0558	0.1505	0.0114	0.0004	0.0769	0.0027	0.0053
Chongqing	2009	0.0525	0.2555	0.2568	0.0002	0.1572	0.0552	0.1499	0.0104	0.0003	0.0552	0.0028	0.0039
Chongqing	2010	0.0495	0.2582	0.257	0.0002	0.1581	0.0554	0.1514	0.0087	0.0003	0.0559	0.0024	0.0029
Chongqing	2011	0.0582	0.2564	0.2595	0.0002	0.1525	0.0545	0.1517	0.0063	0.0002	0.0561	0.0025	0.0019
Chongqing	2012	0.0504	0.2586	0.2578	0.0002	0.1569	0.0564	0.1527	0.0049	0.0002	0.056	0.0025	0.0034
Chongqing	2013	0.0551	0.26	0.259	0.0002	0.1578	0.0555	0.153	0.0045	0.0002	0.0499	0.0027	0.0021
Chongqing	2014	0.0366	0.2647	0.2749	0.0001	0.145	0.0539	0.1626	0.0038	0.0001	0.0527	0.003	0.0026
Chongqing	2015	0.0497	0.2646	0.2596	0.0002	0.162	0.0493	0.1563	0.003	0.0001	0.0505	0.0029	0.0019
Chongqing	2016	0.0449	0.2646	0.2722	0.0001	0.1482	0.0479	0.1616	0.0028	0.0001	0.0521	0.0042	0.0012
Chongqing	2017	0.0485	0.2634	0.2747	0.0001	0.1425	0.0473	0.1625	0.0026	0.0001	0.0524	0.0042	0.0017
Chongqing	2018	0.0483	0.2682	0.2693	0.0002	0.1575	0.0438	0.1608	0.0024	0.0001	0.0433	0.0042	0.0018
Chongqing	2019	0.053	0.2679	0.2673	0.0002	0.1596	0.0417	0.1598	0.0022	0.0001	0.0429	0.0042	0.0011
Chongqing	2020	0.0313	0.2748	0.2926	0.0001	0.1362	0.037	0.1748	0.0012	0.0001	0.0464	0.0046	0.0008
Chongqing	2021	0.0404	0.2723	0.2883	0.0001	0.1366	0.0384	0.1719	0.0012	0.0001	0.0458	0.0045	0.0005
Chongqing	2022	0.0676	0.2677	0.2573	0.0002	0.1702	0.032	0.1575	0.0009	0	0.0417	0.0042	0.0006
Sichuan	2008	0.0551	0.2401	0.2599	0.0001	0.1676	0.0675	0.1199	0.0065	0.0005	0.0655	0.0055	0.0119
Sichuan	2009	0.0561	0.245	0.2604	0.0001	0.1718	0.0688	0.1159	0.0061	0.0004	0.0586	0.0056	0.0113
Sichuan	2010	0.0555	0.2436	0.2668	0.0001	0.1695	0.0693	0.1158	0.005	0.0004	0.0596	0.0055	0.0089
Sichuan	2011	0.0623	0.2463	0.2595	0.0001	0.1738	0.0684	0.113	0.0041	0.0003	0.0586	0.0059	0.0076
Sichuan	2012	0.0568	0.2419	0.2752	0.0001	0.1666	0.0689	0.1138	0.0032	0.0003	0.061	0.0062	0.006
Sichuan	2013	0.0582	0.2467	0.2662	0.0001	0.1725	0.0696	0.1127	0.0031	0.0002	0.0581	0.0067	0.006
Sichuan	2014	0.0583	0.2463	0.2687	0.0001	0.1715	0.0668	0.115	0.0022	0.0002	0.0585	0.0073	0.0053
Sichuan	2015	0.0601	0.2528	0.2645	0.0001	0.178	0.0658	0.1059	0.0028	0.0002	0.0582	0.0075	0.0041
Sichuan	2016	0.0607	0.2518	0.267	0.0001	0.1763	0.0652	0.1059	0.0028	0.0002	0.0585	0.0078	0.0037
Sichuan	2017	0.0623	0.2506	0.2691	0.0001	0.1744	0.0649	0.106	0.0024	0.0002	0.0588	0.008	0.0031
Sichuan	2018	0.0574	0.2485	0.2816	0.0001	0.1693	0.0621	0.1125	0.0018	0.0002	0.0553	0.0088	0.0025
Sichuan	2019	0.0592	0.2504	0.2774	0.0001	0.1719	0.0605	0.1133	0.0015	0.0001	0.0547	0.0091	0.0018
Sichuan	2020	0.0492	0.2471	0.2885	0.0001	0.1659	0.0594	0.1216	0.0008	0.0001	0.0563	0.0097	0.0013
Sichuan	2021	0.0538	0.2508	0.2832	0.0001	0.1708	0.057	0.1177	0.0006	0.0001	0.0556	0.0089	0.0014
Sichuan	2022	0.0705	0.2544	0.2665	0.0001	0.1784	0.0551	0.1101	0.0005	0.0001	0.0531	0.0098	0.0014
Guizhou	2008	0.0389	0.2343	0.2537	0.0001	0.147	0.0674	0.1466	0.0154	0.0008	0.075	0.0008	0.02
Guizhou	2009	0.0499	0.2413	0.2459	0.0001	0.1583	0.0686	0.145	0.0142	0.0007	0.0606	0.0009	0.0145
Guizhou	2010	0.0379	0.2446	0.2562	0.0001	0.1614	0.0679	0.1501	0.0129	0.0006	0.0628	0.0009	0.0046
Guizhou	2011	0.0622	0.2473	0.2348	0.0002	0.172	0.0661	0.1441	0.0089	0.0004	0.0596	0.0012	0.0031
Guizhou	2012	0.0368	0.2432	0.2564	0.0001	0.1603	0.075	0.1502	0.0101	0.0004	0.0628	0.0016	0.003
Guizhou	2013	0.051	0.2512	0.2483	0.0001	0.1712	0.0647	0.1511	0.0058	0.0003	0.0524	0.0016	0.0021
Guizhou	2014	0.0379	0.2437	0.2712	0.0001	0.1533	0.0687	0.1594	0.0056	0.0003	0.0557	0.0022	0.002
Guizhou	2015	0.0328	0.247	0.271	0.0001	0.1571	0.0687	0.1588	0.0045	0.0003	0.0557	0.0022	0.0018
Guizhou	2016	0.0363	0.2483	0.2682	0.0001	0.1603	0.068	0.1557	0.0041	0.0002	0.0549	0.0019	0.002
Guizhou	2017	0.0426	0.2484	0.2659	0.0001	0.1606	0.0657	0.1542	0.0035	0.0002	0.0547	0.0023	0.0019
Guizhou	2018	0.0421	0.2543	0.2668	0.0001	0.1664	0.066	0.1544	0.0033	0.0002	0.0427	0.0025	0.0011
Guizhou	2019	0.0387	0.2522	0.2738	0.0001	0.1606	0.0667	0.1568	0.0032	0.0002	0.0435	0.003	0.0013
Guizhou	2020	0.0278	0.2527	0.2847	0.0001	0.1514	0.0651	0.1668	0.0022	0.0001	0.0447	0.0034	0.0011
Guizhou	2021	0.0407	0.2555	0.2719	0.0001	0.1613	0.0647	0.1571	0.002	0.0001	0.0432	0.0027	0.0006
Guizhou	2022	0.0589	0.2549	0.2597	0.0001	0.1668	0.0584	0.1541	0.0009	0.0001	0.0418	0.0037	0.0005
Yunnan	2008	0.0341	0.2239	0.2712	0.0001	0.1743	0.0785	0.1482	0.0063	0.0008	0.051	0.0016	0.01
Yunnan	2009	0.0529	0.2424	0.2554	0.0001	0.1858	0.0727	0.1412	0.006	0.0007	0.036	0.0016	0.0053
Yunnan	2010	0.0448	0.2365	0.2661	0.0001	0.182	0.0752	0.1477	0.0056	0.0006	0.0372	0.0018	0.0025
Yunnan	2011	0.0561	0.2453	0.2538	0.0001	0.1871	0.0697	0.1421	0.0046	0.0005	0.0357	0.003	0.002
Yunnan	2012	0.0477	0.2406	0.2597	0.0001	0.1837	0.0797	0.1423	0.0044	0.0004	0.0362	0.0032	0.002
Yunnan	2013	0.0522	0.2408	0.2612	0.0001	0.1836	0.0773	0.1432	0.0036	0.0004	0.0315	0.0032	0.0029
Yunnan	2014	0.0509	0.2402	0.2624	0.0001	0.1829	0.0786	0.1431	0.0033	0.0003	0.0315	0.0033	0.0033
Yunnan	2015	0.0451	0.2391	0.2667	0.0001	0.182	0.0791	0.1454	0.0032	0.0003	0.032	0.0037	0.0034
Yunnan	2016	0.0458	0.2352	0.2701	0.0001	0.1791	0.0792	0.1478	0.0029	0.0003	0.0325	0.0039	0.003
Yunnan	2017	0.0418	0.2349	0.273	0.0001	0.1786	0.0807	0.1481	0.0031	0.0003	0.033	0.0041	0.0023
Yunnan	2018	0.0433	0.2384	0.2761	0.0001	0.1809	0.0786	0.1504	0.0024	0.0003	0.0235	0.0044	0.0017
Yunnan	2019	0.0588	0.2492	0.258	0.0001	0.1881	0.0743	0.1414	0.002	0.0002	0.0221	0.0042	0.0016
Yunnan	2020	0.0487	0.2461	0.2693	0.0001	0.1874	0.0743	0.1462	0.0015	0.0002	0.0228	0.0023	0.001
Yunnan	2021	0.0525	0.2497	0.2652	0.0001	0.1899	0.0708	0.1428	0.0012	0.0002	0.0225	0.0043	0.0008
Yunnan	2022	0.0568	0.2464	0.2674	0.0001	0.1878	0.072	0.1429	0.001	0.0001	0.0227	0.0023	0.0005
Shanxi	2008	0.0797	0.248	0.2203	0.0003	0.1811	0.0605	0.1384	0.0019	0.0003	0.0547	0.0017	0.0133
Shanxi	2009	0.0739	0.2502	0.23	0.0002	0.1806	0.0598	0.1425	0.0015	0.0002	0.0485	0.0019	0.0106
Shanxi	2010	0.0736	0.2483	0.2356	0.0002	0.1777	0.0601	0.144	0.0013	0.0002	0.0489	0.0021	0.0082
Shanxi	2011	0.0701	0.2489	0.2411	0.0002	0.1762	0.0596	0.1455	0.001	0.0002	0.0498	0.0022	0.0052
Shanxi	2012	0.076	0.2522	0.2295	0.0003	0.1826	0.0616	0.1421	0.0008	0.0001	0.0487	0.0023	0.0037
Shanxi	2013	0.077	0.2548	0.2301	0.0003	0.1851	0.0617	0.1423	0.0008	0.0001	0.042	0.0023	0.0036
Shanxi	2014	0.0768	0.2557	0.229	0.0003	0.1858	0.0614	0.1426	0.0007	0.0001	0.0421	0.0026	0.0028
Shanxi	2015	0.0794	0.2559	0.2275	0.0003	0.1862	0.0601	0.1419	0.0008	0.0001	0.042	0.0031	0.0027
Shanxi	2016	0.081	0.2576	0.2233	0.0004	0.1886	0.0591	0.1415	0.0008	0.0001	0.0418	0.0031	0.0028
Shanxi	2017	0.0754	0.2544	0.2352	0.0002	0.1828	0.0596	0.1432	0.0007	0.0001	0.0425	0.0033	0.0025
Shanxi	2018	0.0784	0.2566	0.2319	0.0003	0.1858	0.0587	0.1423	0.0006	0.0001	0.0396	0.0035	0.0023
Shanxi	2019	0.0775	0.2538	0.2397	0.0002	0.1813	0.0574	0.1439	0.0006	0.0001	0.0399	0.0039	0.0015
Shanxi	2020	0.0748	0.259	0.2342	0.0003	0.1863	0.0549	0.1454	0.0004	0.0001	0.0402	0.0033	0.0011
Shanxi	2021	0.0658	0.2518	0.2566	0.0001	0.1717	0.0547	0.1513	0.0003	0.0001	0.0419	0.0047	0.0011
Shanxi	2022	0.0817	0.2598	0.2297	0.0003	0.188	0.0538	0.1435	0.0002	0.0001	0.04	0.002	0.001
Gansu	2008	0.0908	0.2364	0.1853	0.0007	0.1817	0.0737	0.1221	0.0051	0.0009	0.091	0.0005	0.0116
Gansu	2009	0.0911	0.2374	0.1888	0.0007	0.1829	0.0716	0.1236	0.005	0.0009	0.0861	0.0006	0.0113
Gansu	2010	0.0891	0.2375	0.1908	0.0006	0.1835	0.0721	0.1238	0.0039	0.0007	0.0864	0.0006	0.011
Gansu	2011	0.089	0.236	0.1947	0.0006	0.1829	0.0726	0.1235	0.0037	0.0006	0.0864	0.0008	0.0092
Gansu	2012	0.0902	0.2346	0.1959	0.0005	0.1824	0.0745	0.1234	0.0034	0.0005	0.0864	0.0008	0.0073
Gansu	2013	0.0891	0.2351	0.1968	0.0005	0.1829	0.0767	0.124	0.0026	0.0005	0.0853	0.0009	0.0056
Gansu	2014	0.0901	0.2391	0.192	0.0007	0.1842	0.0762	0.1243	0.0024	0.0004	0.0852	0.0009	0.0045
Gansu	2015	0.0907	0.2415	0.1883	0.0008	0.1852	0.0761	0.1249	0.0026	0.0004	0.0854	0.0009	0.0031
Gansu	2016	0.0915	0.2424	0.186	0.0008	0.1859	0.0762	0.1257	0.0025	0.0004	0.0858	0.0009	0.0019
Gansu	2017	0.0906	0.2383	0.194	0.0006	0.1844	0.0752	0.1261	0.0023	0.0004	0.0857	0.0009	0.0016
Gansu	2018	0.0894	0.2341	0.2006	0.0004	0.1834	0.0743	0.1277	0.0018	0.0003	0.086	0.001	0.0012
Gansu	2019	0.0887	0.2338	0.2037	0.0004	0.1829	0.0731	0.1278	0.0016	0.0003	0.0857	0.001	0.0009
Gansu	2020	0.089	0.2282	0.2103	0.0003	0.1815	0.0735	0.128	0.0011	0.0003	0.0858	0.001	0.0009
Gansu	2021	0.0899	0.2342	0.205	0.0004	0.1828	0.0725	0.1271	0.0009	0.0002	0.0852	0.001	0.0009
Gansu	2022	0.0938	0.2367	0.1994	0.0006	0.1835	0.0718	0.1262	0.0007	0.0002	0.0851	0.0011	0.0007
Qinghai	2008	0.096	0.0857	0.2278	0	0.2024	0.0797	0.164	0.0158	0.001	0.1077	0	0.0199
Qinghai	2009	0.1009	0.018	0.2524	0	0.2191	0.0826	0.1821	0.0064	0.0008	0.1182	0.0001	0.0195
Qinghai	2010	0.0995	0.0665	0.2365	0	0.2094	0.079	0.1717	0.0055	0.0006	0.1118	0.0001	0.0194
Qinghai	2011	0.1006	0.0712	0.2377	0	0.2099	0.0781	0.1719	0.0046	0.0005	0.112	0	0.0135
Qinghai	2012	0.103	0.0254	0.2488	0	0.2169	0.0905	0.1807	0.003	0.0004	0.117	0	0.0143
Qinghai	2013	0.0984	0.0973	0.2292	0	0.2034	0.083	0.1664	0.0029	0.0004	0.106	0	0.0128
Qinghai	2014	0.1001	0.0595	0.2415	0	0.2113	0.0842	0.1751	0.0025	0.0003	0.1112	0.0001	0.0142
Qinghai	2015	0.0961	0.1147	0.2243	0	0.2011	0.0787	0.1643	0.0028	0.0003	0.1044	0.0001	0.0131
Qinghai	2016	0.0964	0.1112	0.2279	0	0.2038	0.0779	0.1668	0.0022	0.0003	0.106	0.0002	0.0074
Qinghai	2017	0.0997	0.0683	0.2413	0	0.2124	0.0808	0.1761	0.0019	0.0003	0.1118	0.0002	0.0073
Qinghai	2018	0.1036	0.0201	0.2572	0	0.2225	0.085	0.1866	0.0017	0.0003	0.1181	0.0002	0.0047
Qinghai	2019	0.1036	0.0351	0.2532	0	0.2205	0.0823	0.1844	0.0018	0.0002	0.1167	0.0002	0.0019
Qinghai	2020	0.1071	0	0.2643	0	0.227	0.0851	0.1916	0.0016	0.0002	0.1209	0.0002	0.0019
Qinghai	2021	0.1027	0.052	0.2495	0	0.2165	0.0814	0.1806	0.0012	0.0002	0.114	0.0002	0.0016
Qinghai	2022	0.1019	0.0841	0.239	0	0.2101	0.0783	0.1739	0.001	0.0002	0.1098	0.0002	0.0015
Ningxia	2008	0.1076	0.283	0.0116	0.011	0.213	0.0967	0.155	0.0036	0.0024	0.1063	0.0004	0.0094
Ningxia	2009	0.1092	0.2851	0	0.0117	0.2146	0.0969	0.1566	0.004	0.0015	0.1004	0.0005	0.0195
Ningxia	2010	0.1045	0.2849	0.0191	0.0106	0.2144	0.0967	0.1566	0.0036	0.0012	0.1004	0.0005	0.0075
Ningxia	2011	0.1058	0.2851	0.0188	0.0114	0.2145	0.0964	0.1562	0.0032	0.001	0.1004	0.0004	0.0068
Ningxia	2012	0.1012	0.2731	0.0647	0.0084	0.2055	0.0932	0.1511	0.0031	0.0008	0.0963	0.0004	0.0022
Ningxia	2013	0.0989	0.2732	0.071	0.0083	0.2057	0.0935	0.1505	0.0029	0.0007	0.093	0.0004	0.0019
Ningxia	2014	0.0983	0.2786	0.0546	0.0093	0.2096	0.0948	0.1537	0.0029	0.0007	0.0947	0.0004	0.0026
Ningxia	2015	0.1036	0.2825	0.038	0.0104	0.2125	0.0956	0.1557	0.0025	0.0007	0.0959	0.0003	0.0024
Ningxia	2016	0.1029	0.2724	0.0708	0.0088	0.2049	0.0906	0.1517	0.0023	0.0005	0.0925	0.0003	0.0021
Ningxia	2017	0.0986	0.2697	0.0854	0.0079	0.2029	0.0895	0.15	0.0019	0.0005	0.0917	0.0002	0.0016
Ningxia	2018	0.0919	0.2565	0.1352	0.0055	0.1931	0.0846	0.1431	0.0016	0.0004	0.0863	0.0002	0.0015
Ningxia	2019	0.0945	0.2626	0.1156	0.007	0.1976	0.0857	0.1453	0.0016	0.0005	0.0882	0.0002	0.0014
Ningxia	2020	0.0978	0.2669	0.1014	0.0082	0.2007	0.0849	0.1473	0.0015	0.0005	0.0895	0.0002	0.0011
Ningxia	2021	0.1016	0.2702	0.0878	0.0095	0.2031	0.0857	0.1495	0.001	0.0004	0.0904	0.0002	0.0007
Ningxia	2022	0.1039	0.2682	0.0916	0.0096	0.2016	0.0846	0.1488	0.0009	0.0003	0.0898	0.0003	0.0004
Xinjiang	2008	0.1127	0.2193	0.21	0.0008	0.2076	0.0957	0.0256	0.0028	0.0042	0.1109	0.0012	0.0091
Xinjiang	2009	0.112	0.2245	0.2108	0.0009	0.2075	0.0944	0.0248	0.0033	0.0035	0.1088	0.0013	0.0082
Xinjiang	2010	0.1116	0.2034	0.2234	0.0006	0.211	0.0979	0.0243	0.0027	0.0028	0.1118	0.0014	0.0092
Xinjiang	2011	0.1126	0.2178	0.2141	0.0008	0.2085	0.0956	0.0271	0.0023	0.0022	0.1097	0.0014	0.0078
Xinjiang	2012	0.1143	0.2223	0.2181	0.0009	0.2131	0.0991	0.0084	0.0022	0.0023	0.1122	0.0017	0.0055
Xinjiang	2013	0.1148	0.2192	0.2218	0.0008	0.213	0.0992	0.009	0.0022	0.002	0.1119	0.0018	0.0043
Xinjiang	2014	0.1136	0.2327	0.2147	0.0011	0.2102	0.097	0.0106	0.0021	0.0018	0.1097	0.0018	0.0047
Xinjiang	2015	0.1126	0.2221	0.2203	0.0008	0.2117	0.0979	0.0121	0.0022	0.0018	0.1112	0.0018	0.0057
Xinjiang	2016	0.1117	0.2136	0.2251	0.0007	0.2124	0.0982	0.0156	0.0022	0.0017	0.1121	0.0017	0.005
Xinjiang	2017	0.1127	0.2183	0.2211	0.0007	0.2109	0.0969	0.0193	0.002	0.0014	0.111	0.0018	0.0037
Xinjiang	2018	0.1116	0.2283	0.2186	0.0008	0.2099	0.096	0.0201	0.0016	0.0013	0.1089	0.0013	0.0016
Xinjiang	2019	0.1133	0.2313	0.2208	0.0009	0.2124	0.0972	0.0091	0.0014	0.0012	0.1102	0.0013	0.0008
Xinjiang	2020	0.1149	0.2354	0.2142	0.0009	0.2111	0.0957	0.014	0.0014	0.0012	0.1093	0.0013	0.0007
Xinjiang	2021	0.1133	0.2336	0.2225	0.0009	0.2096	0.0944	0.0129	0.001	0.001	0.1085	0.0013	0.001
Xinjiang	2022	0.1151	0.2278	0.2242	0.0008	0.2098	0.0946	0.0151	0.0007	0.0009	0.109	0.0013	0.0007

## Sheet: 水-全国平均障碍度时间变化
year	X1	X2	X3	X4	X5	X6	X7	X8	X9	X10	X11	X12
2008	0.08715	0.265717	0.201667	0.00195333	0.185637	0.0259133	0.156537	0.00044	1.33333e-05	0.06994	0.00175	0.00325
2009	0.08738	0.262127	0.18157	0.00113667	0.192357	0.0633367	0.12983	0.000953333	0.000133333	0.0752967	0.00325667	0.00261
2010	0.0896833	0.243993	0.218027	0.000533333	0.18661	0.06955	0.12152	0.00179333	0.000216667	0.06122	0.00311667	0.00372333
2011	0.0844233	0.24259	0.239343	0.000406667	0.187143	0.0823233	0.107823	0.00409667	0.00048	0.04311	0.00232667	0.00591333
2012	0.0592433	0.277307	0.248423	0.00292333	0.159347	0.0673433	0.0752567	0.00446333	0.00017	0.0944967	0.00831333	0.00271
2013	0.0482033	0.282743	0.28058	0.000363333	0.139993	0.0683267	0.120953	0.00427667	0.000263333	0.04369	0.00761667	0.00299333
2014	0.0383567	0.277893	0.306287	0.000236667	0.125703	0.0885467	0.137547	0.00530667	0.000406667	0.00913	0.00564333	0.00493
2015	0.0813833	0.265943	0.206783	0.000973333	0.184463	0.0627733	0.106847	0.00111333	0.00012	0.0791233	0.00838667	0.00210333
2016	0.0506133	0.275187	0.279093	0.00034	0.15366	0.0788867	0.0966233	0.00590667	0.00037	0.0482167	0.00682667	0.00428667
2017	0.0314467	0.291157	0.313973	0.00029	0.145087	0.0758767	0.0889133	0.00556333	0.000436667	0.02875	0.0137567	0.00476333
2018	0.0448067	0.25524	0.28018	0.000156667	0.13348	0.06204	0.173967	0.00444	0.000303333	0.0382567	0.00198333	0.00516333
2019	0.0503333	0.24784	0.2661	0.000103333	0.16621	0.0657	0.13345	0.00466667	0.00028	0.0560167	0.00477333	0.00453
2020	0.06242	0.24719	0.248977	0.00018	0.1831	0.0674567	0.144107	0.00211667	0.000253333	0.03776	0.00296333	0.00349
2021	0.09542	0.14848	0.21874	0.000286667	0.19788	0.07789	0.15048	0.00315	0.000433333	0.0992367	0.00049	0.00749
2022	0.107237	0.24872	0.14151	0.005	0.208413	0.0939733	0.08397	0.00222333	0.00138	0.102367	0.00091	0.00430333

## Sheet: Sheet1
year	X1	X2	X3	X4	X5	X6	X7	X8	X9	X10	X11	X12
2008	0.0872	0.2657	0.2017	0.002	0.1856	0.0259	0.1565	0.0004	0	0.0699	0.0018	0.0033
2009	0.0874	0.2621	0.1816	0.0011	0.1924	0.0633	0.1298	0.001	0.0001	0.0753	0.0033	0.0026
2010	0.0897	0.2441	0.218	0.0005	0.1866	0.0696	0.1215	0.0018	0.0002	0.0612	0.0031	0.0037
2011	0.0844	0.2428	0.2393	0.0004	0.1871	0.0823	0.1078	0.0041	0.0005	0.0431	0.0023	0.0059
2012	0.0592	0.2774	0.2484	0.0029	0.1593	0.0673	0.0753	0.0045	0.0002	0.0945	0.0083	0.0027
2013	0.0482	0.2826	0.2806	0.0004	0.14	0.0683	0.121	0.0043	0.0003	0.0437	0.0076	0.003
2014	0.0384	0.2781	0.3063	0.0002	0.1257	0.0885	0.1375	0.0053	0.0004	0.0091	0.0056	0.0049
2015	0.0814	0.2659	0.2068	0.001	0.1845	0.0628	0.1068	0.0011	0.0001	0.0791	0.0084	0.0021
2016	0.0506	0.2752	0.2791	0.0003	0.1537	0.0789	0.0966	0.0059	0.0004	0.0482	0.0068	0.0043
2017	0.0314	0.291	0.314	0.0003	0.1451	0.0759	0.0889	0.0056	0.0004	0.0288	0.0138	0.0048
2018	0.0448	0.2551	0.2802	0.0002	0.1335	0.062	0.174	0.0044	0.0003	0.0383	0.002	0.0052
2019	0.0503	0.2478	0.2661	0.0001	0.1662	0.0657	0.1335	0.0047	0.0003	0.056	0.0048	0.0045
2020	0.0624	0.247	0.249	0.0002	0.1831	0.0675	0.1441	0.0021	0.0003	0.0378	0.003	0.0035
2021	0.0954	0.1485	0.2187	0.0003	0.1979	0.0779	0.1505	0.0032	0.0004	0.0992	0.0005	0.0075
2022	0.1072	0.2487	0.1415	0.005	0.2084	0.094	0.084	0.0022	0.0014	0.1024	0.0009	0.0043
